# Supplementary material for: 3′quant mRNA-Seq of Porcine Liver Reveals Alterations in UPR, Acute Phase Response, and Cholesterol and Bile Acid Metabolism in Response to Different Dietary Fats
Source: MDPI journal article supplement (doi:10.3390/genes11091087), 2020-09-18

# Rapeseed oil vs Beef tallow

## MA plot

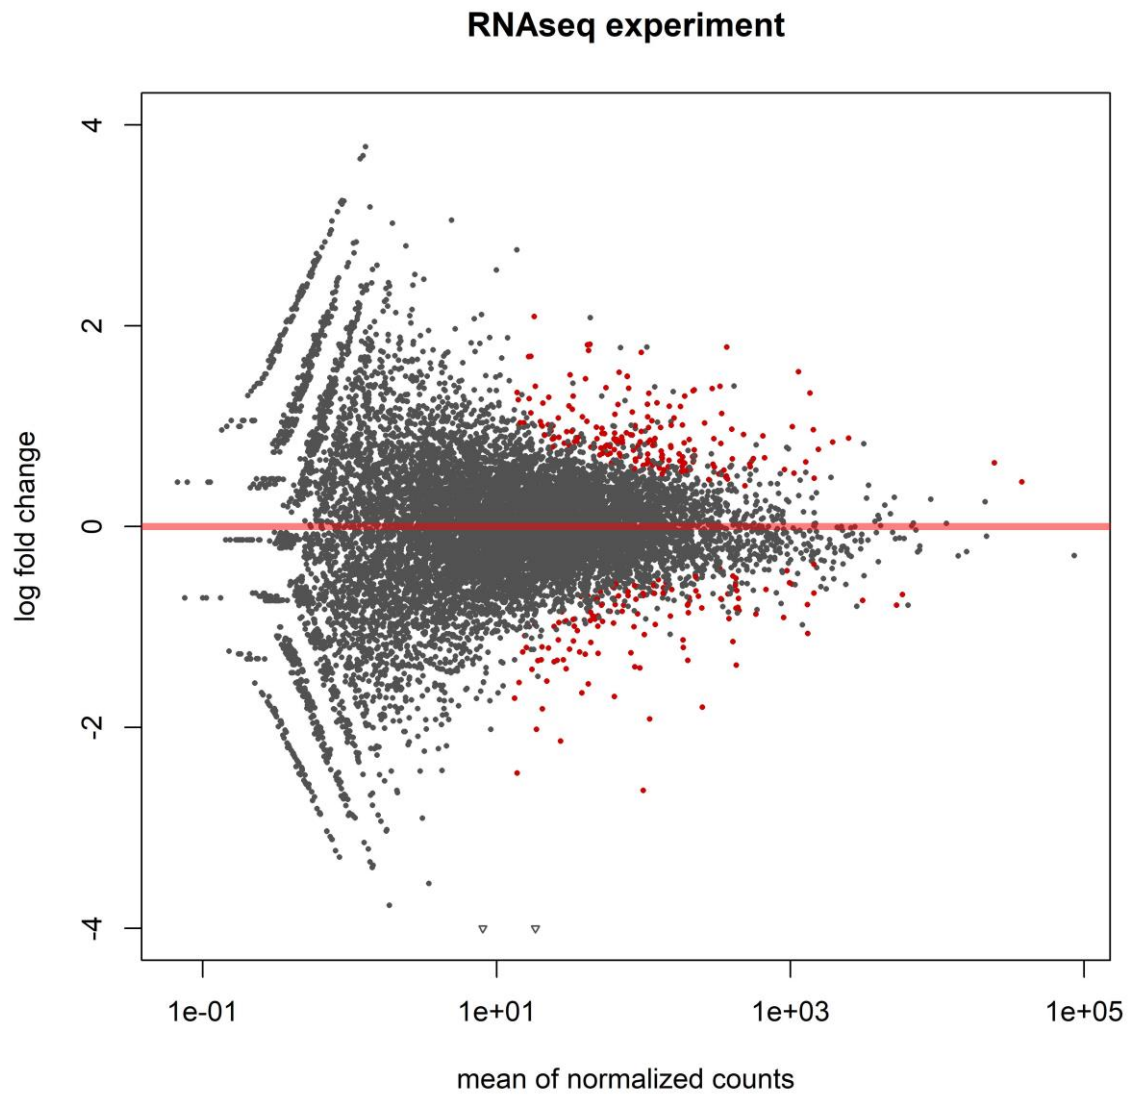

# Rapeseed oil vs Beef tallow

## PCA plot

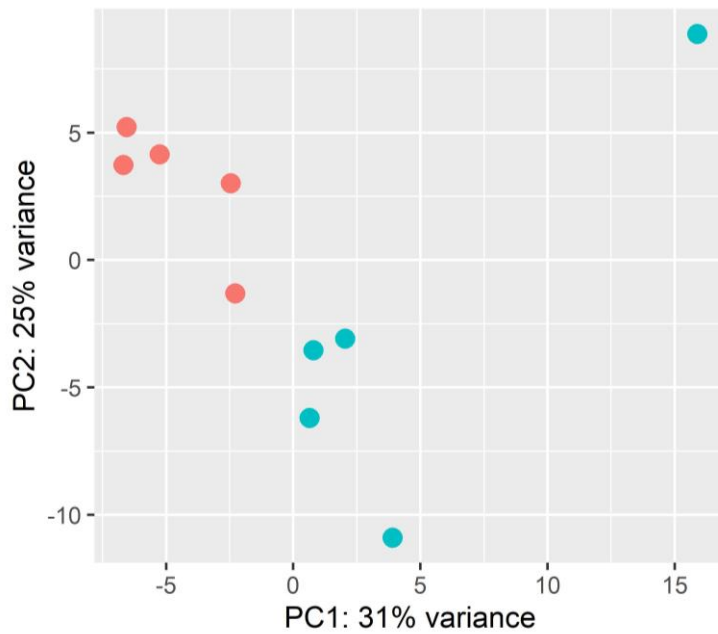

Rapeseed oil

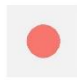

Beef tallow

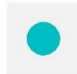

# Rapeseed oil vs Coconut oil

## MA plot

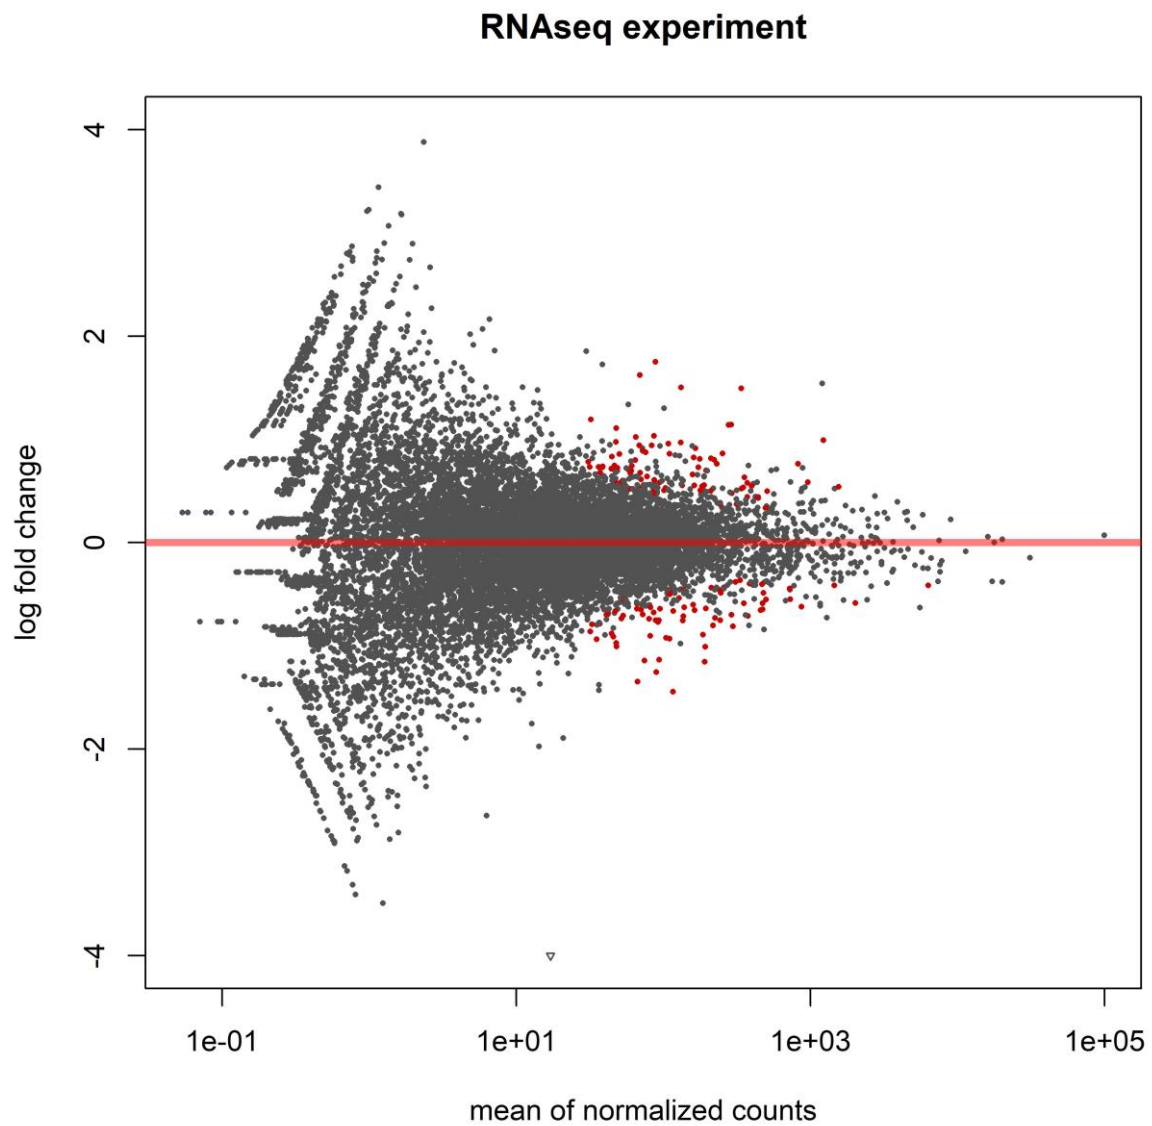

# Rapeseed oil vs Coconut oil

## PCA plot

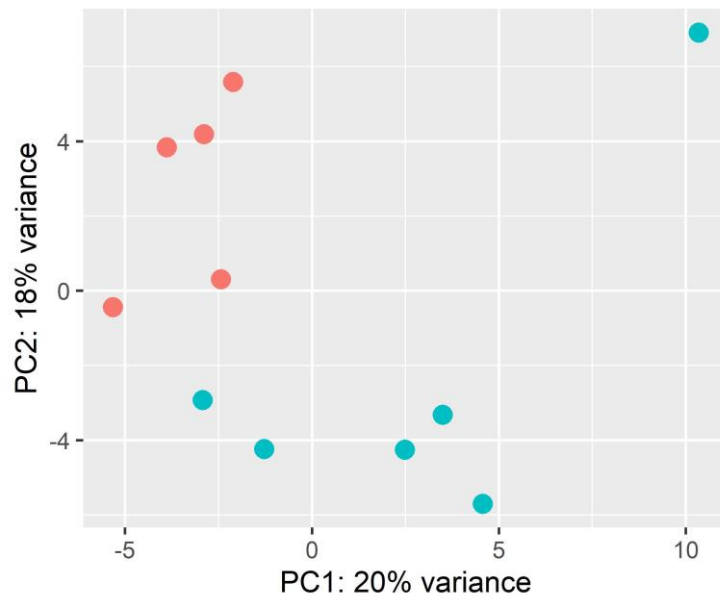

Rapeseed oil

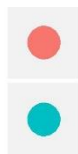

Coconut oil

# Beef tallow vs Coconut oil

## MA plot

RNAseq experiment

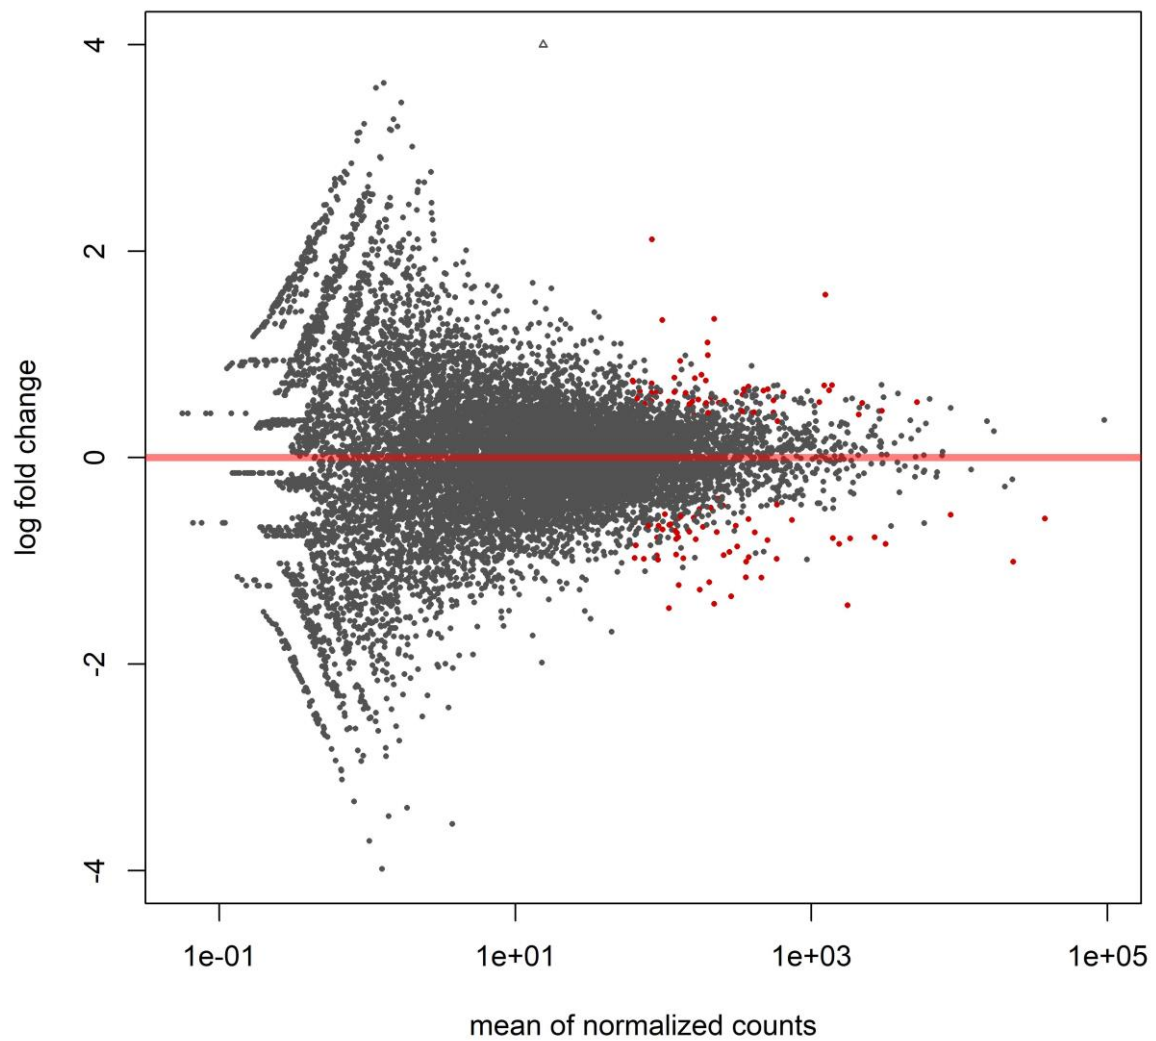

# Beef tallow vs Coconut oil

## PCA plot

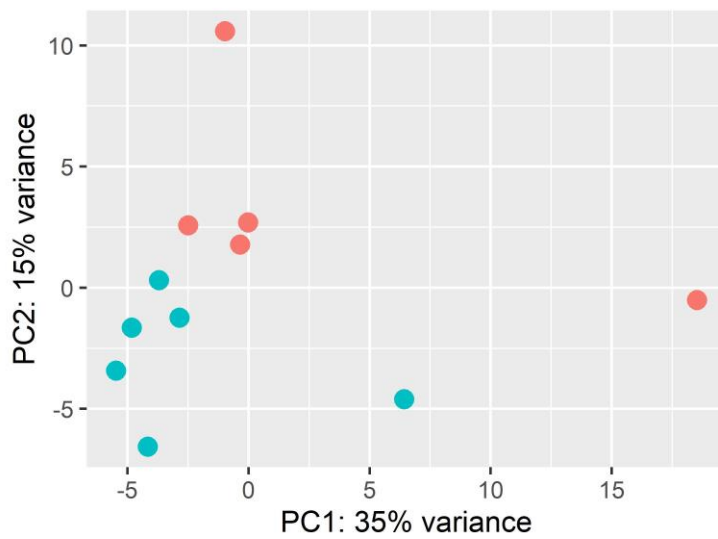

Beef tallow

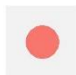

Coconut oil

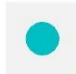

Supplement: s1 [file s1]
