# Supplementary material for: 3′quant mRNA-Seq of Porcine Liver Reveals Alterations in UPR, Acute Phase Response, and Cholesterol and Bile Acid Metabolism in Response to Different Dietary Fats
Source: MDPI journal article supplement (doi:10.3390/genes11091087), 2020-09-18

Rapeseed oil vs Beef tallow, the more intense red colour, the lower p-value.

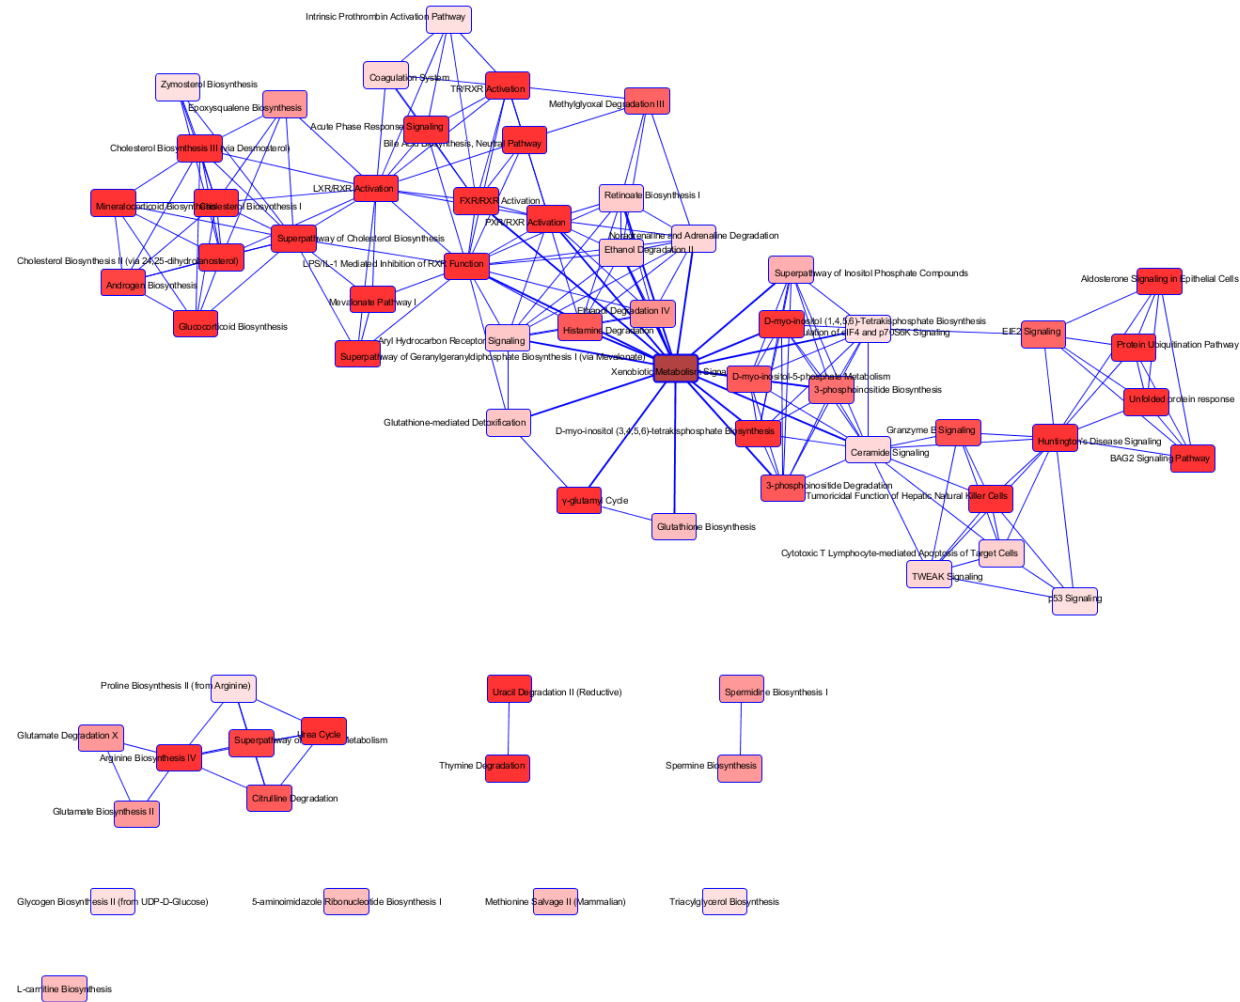

Rapeseed oil vs Coconut oil, the more intense red colour, the lower p-value.

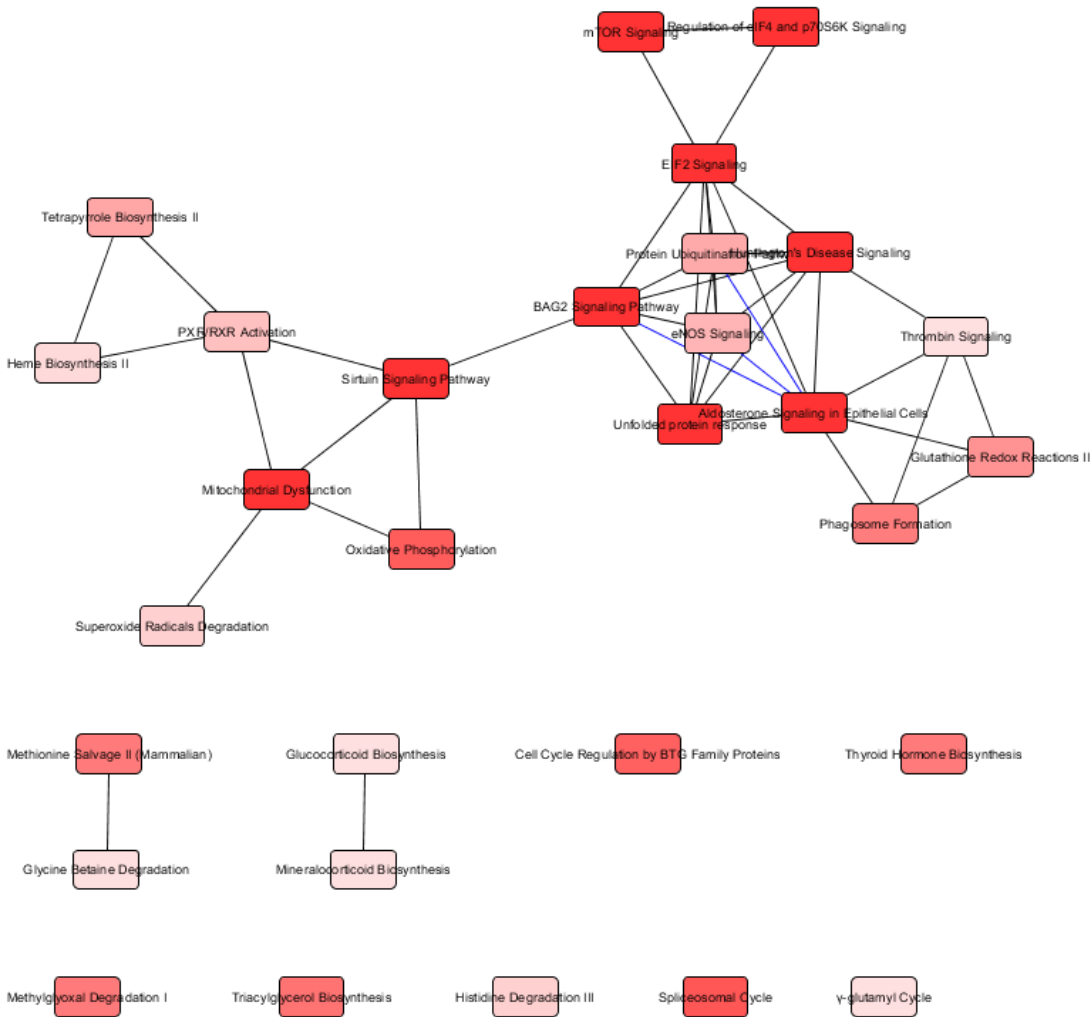

Beef tallow vs Coconut oil, the more intense red colour, the lower p-value.

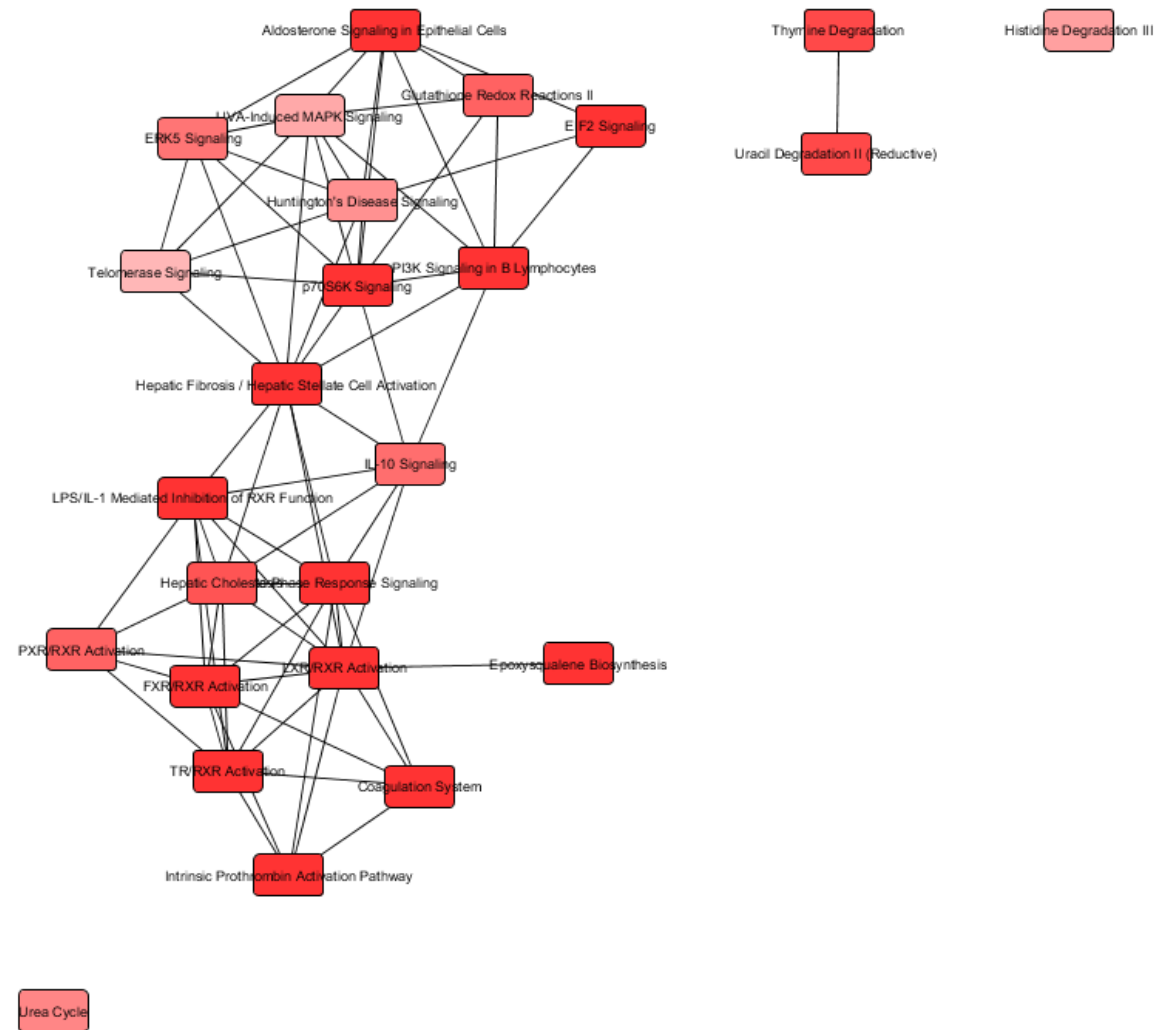

Supplement: s1 [file s1]
