# Supplementary material for: 3′quant mRNA-Seq of Porcine Liver Reveals Alterations in UPR, Acute Phase Response, and Cholesterol and Bile Acid Metabolism in Response to Different Dietary Fats
Source: Genes (Basel). 2020 Sep 18;11(9):1087. doi: 10.3390/genes11091087 (PMC7565913; doi:10.3390/genes11091087)
Supplement: Supplementary file 1 [file genes-11-01087-s001.zip]

Archive with 6 entries (6 files):
- Supplementary figure 2..pdf
- Supplementary figure1.pdf
- Supplementary table 2.xlsx
- Supplementary table 3.xlsx
- Supplementary table 4.xlsx
- Supplementary table1..xlsx
