# Supplementary material for: 3′quant mRNA-Seq of Porcine Liver Reveals Alterations in UPR, Acute Phase Response, and Cholesterol and Bile Acid Metabolism in Response to Different Dietary Fats
Source: Genes (Basel). 2020 Sep 18;11(9):1087. doi: 10.3390/genes11091087 (PMC7565913; doi:10.3390/genes11091087)
Supplement: Supplementary file 1 [file genes-11-01087-s001.zip › Supplementary table 2.xlsx]

## Sheet: common DEGs
2 common elements in "R vs B", "R vs C" and "B vs C":
Ensemble gene ID					Gene Symbol	Expression up or down
ENSSSCG00000005601					HSPA5	R<C<B
ENSSSCG00000022126					EGFR	R<C<B
28 common elements in "R vs B" and "R vs C":
ENSSSCG00000006719					HSD3B1		upregulated in rapeseed oil
ENSSSCG00000005994					SNTB1
ENSSSCG00000014111					BHMT2
ENSSSCG00000008233					TMEM150A
ENSSSCG00000001849					ANPEP
ENSSSCG00000039388					#N/A
ENSSSCG00000013302					CAT
ENSSSCG00000037562					SLC2A4RG		downregulated in rapeseed oil
ENSSSCG00000014338					HSPA9
ENSSSCG00000007355					TOP1
ENSSSCG00000008180					EIF5B
ENSSSCG00000008433					STPG4
ENSSSCG00000010679					EIF3A
ENSSSCG00000033402					SARAF
ENSSSCG00000004542					NARS1
ENSSSCG00000002470					DDX24
ENSSSCG00000039658					CDNF
ENSSSCG00000029849					S1PR1
ENSSSCG00000029886					LYVE1
ENSSSCG00000038494					LPIN2
ENSSSCG00000012880					CPT1A
ENSSSCG00000030268					ZFAND5
ENSSSCG00000015067					ZPR1
ENSSSCG00000011297					ABHD5
ENSSSCG00000015140					HSPA8
ENSSSCG00000030095					ZBTB16
ENSSSCG00000010686					BAG3
ENSSSCG00000007554					ZFAND2A
23 common elements in "R vs B" and "B vs C":
ENSSSCG00000006238					CYP7A1		downregulated in beef tallow
ENSSSCG00000026044					FDFT1
ENSSSCG00000006872					AGL
ENSSSCG00000010060					UPB1
ENSSSCG00000015926					ABCB11
ENSSSCG00000023686					TTR
ENSSSCG00000008214					FABP1
ENSSSCG00000015799					KLKB1
ENSSSCG00000008998					FGA		upregulated in beef tallow
ENSSSCG00000001499					DST
ENSSSCG00000033074					ZCCHC24
ENSSSCG00000016159					CPS1
ENSSSCG00000028758					LBP
ENSSSCG00000011453					ITIH4
ENSSSCG00000010494					SORBS1
ENSSSCG00000008550					SLC5A6
ENSSSCG00000034072					#N/A
ENSSSCG00000032914					MANF
ENSSSCG00000012007					HSPA13
ENSSSCG00000015106					HYOU1
ENSSSCG00000021443					SGK1
ENSSSCG00000032381					LITAF
ENSSSCG00000000892					HAL
6 common elements in "R vs C" and "B vs C":
ENSSSCG00000018093					0		downregulated in coconut oil
ENSSSCG00000016174					FN1
ENSSSCG00000004700					PDIA3
ENSSSCG00000013514					#N/A
ENSSSCG00000003524					C1QA
ENSSSCG00000002529					0		upregulated in coconut oil

## Sheet: Common GO terms and pathways
3 common elements in R vs B and R vs C and B vs C
CELLULAR COMPONENT; term description
organelle membrane
MOLECULAR FUNCTION; term description
binding
KEGG PATHWAYS; term description
Metabolic pathways
26 common elements in R vs B and R vs C
REACTOME PATHWAYS; term description
Regulation of HSF1-mediated heat shock response
Cellular responses to stress
CELLULAR COMPONENT; term description
cytoplasm
endoplasmic reticulum membrane
cytoplasmic part
endoplasmic reticulum subcompartment
peroxisome
mitochondrion
intracellular membrane-bounded organelle
mitochondrial membrane
intracellular organelle part
membrane part
integral component of membrane
MOLECULAR FUNCTION; term description
oxidoreductase activity
catalytic activity
ion binding
metal ion binding
heme binding
BIOLOGICAL PROCESSES; term description
oxidation-reduction process
metabolic process
primary metabolic process
small molecule metabolic process
organic substance metabolic process
cellular metabolic process
organic substance biosynthetic process
cofactor metabolic process
4 common elements in R vs B and B vs C
KEGG PATHWAYS; term description
Cholesterol metabolism
Bile secretion
Metabolism
Metabolism of steroids
1 common element in R vs C and B vs C
BIOLOGICAL PROCESSES; term description
regulation of biological process
