# Supplementary material for: 3′quant mRNA-Seq of Porcine Liver Reveals Alterations in UPR, Acute Phase Response, and Cholesterol and Bile Acid Metabolism in Response to Different Dietary Fats
Source: Genes (Basel). 2020 Sep 18;11(9):1087. doi: 10.3390/genes11091087 (PMC7565913; doi:10.3390/genes11091087)
Supplement: Supplementary file 1 [file genes-11-01087-s001.zip › Supplementary table 3.xlsx]

## Sheet: gilts vs barrows
	baseMean	log2FoldChange	lfcSE	stat	pvalue	padj	Chromosome/scaffold name
ENSSSCG00000026430	137.306958914527	7.56714673745617	0.427993144469392	17.680532586188	5.92340193980186e-70	9.38326101284012e-66	Y
ENSSSCG00000033734	96.2587999160043	7.44849122027186	0.479962044952868	15.518917169801	2.5837424752e-54	2.04645322748216e-50	Y
ENSSSCG00000037509	25.1086711623705	5.81850292327496	0.544068868184755	10.694423562017	1.08089653019357e-26	5.70749397826547e-23	Y
ENSSSCG00000012178	27.5258848538659	7.27628910338728	0.75070634941935	9.69259033044717	3.2419998071771e-22	1.28391297363731e-18	Y
ENSSSCG00000027046	12.0934794608351	7.18367696754919	0.75199701175121	9.55279988522858	1.26237571151461e-21	3.9994587292206e-18	Y
ENSSSCG00000038249	5.94440595845526	6.15996668388533	0.785971755751643	7.83738937030176	4.6000992180992e-15	1.21450286189849e-11	Y
ENSSSCG00000012179	5.30622137190263	5.22034279565776	0.795052423882144	6.56603594787808	5.1672346664996e-11	1.16934520502886e-07	Y
ENSSSCG00000025253	2.55083583014186	4.93119102482938	0.848324231563845	5.81286121668241	6.14139753740449e-09	1.21607347987531e-05	Y
ENSSSCG00000026864	2.13080875429947	4.6827115632511	0.909416624720109	5.1491378494343	2.61686510703813e-07	0.000460597335117678	Y
ENSSSCG00000032223	138.466438382834	-0.529466882949361	0.111055723451505	-4.767578531696	1.86453325916457e-06	0.00284519688477556	X
ENSSSCG00000032661	1.98303261894655	4.19541203093465	0.88215012812309	4.75589346663819	1.97570644104104e-06	0.00284519688477556	Y
ENSSSCG00000007839	53.3157582305623	0.708643930713403	0.189207751105315	3.74532188334592	0.000180162632423832	0.23782968835216
ENSSSCG00000017311	3.92645911489175	-2.65937907340354	0.740752811171982	-3.59010324806733	0.0003305470052144	0.4027842392001
ENSSSCG00000028908	44.4777607259653	-0.811071143053341	0.228201404303169	-3.55418997323881	0.000379145234509498	0.429002832847498
ENSSSCG00000003797	2.13479918947097	3.46324628685626	0.996221527350166	3.47638170003021	0.000508228390126773	0.536723061866547
ENSSSCG00000023258	31.247491653435	-0.892341713300778	0.259590811677666	-3.4374934441393	0.000587124932140702	0.558521122987554
ENSSSCG00000033718	1.13006794700624	-3.5342235088751	1.0298176596308	-3.43189250623469	0.000599385082430934	0.558521122987554
ENSSSCG00000029857	56.3265399918898	-0.611467173332682	0.179872794835923	-3.39944222187937	0.000675234445327079	0.562967834127698
ENSSSCG00000038811	10.5494684157566	-1.28443986478177	0.377334415370922	-3.40398281328025	0.000664109318260122	0.562967834127698
ENSSSCG00000012148	58.1330887183111	-0.596669682511311	0.182457598650773	-3.27018269956159	0.00107478043663045	0.810742709364904
ENSSSCG00000023909	4.77423233600156	-1.70758718713603	0.520070424273808	-3.28337684174291	0.00102571451766996	0.810742709364904
ENSSSCG00000016778	59.3926574020826	0.699755056952274	0.217087795103242	3.22337355086907	0.00126690219894613	0.9122271697048
ENSSSCG00000007463	5.28860786105795	1.49424708189097	0.468499289166453	3.18943297555374	0.00142552191295821	0.981812722746566
ENSSSCG00000000002	0.75297066865535	2.7069368513671	1.11298736254103	2.43213619711456	0.0150100619529226	0.994731562947848
ENSSSCG00000000003	188.095740716486	0.0849896944624013	0.181517241834594	0.46821830038519	0.639628486466462	0.994731562947848
ENSSSCG00000000005	4.8432887461242	0.325497216557082	0.449410751637965	0.724275543855469	0.46889658815175	0.994731562947848
ENSSSCG00000000006	0.406780098621437	1.19898596103276	1.49987155035051	0.799392428473334	0.424062899387062	0.994731562947848
ENSSSCG00000000007	4.28327915289776	-0.240698890231106	0.47942895960372	-0.502053297802576	0.615630030448895	0.994731562947848
ENSSSCG00000000010	231.295242496036	-0.233700323894978	0.216282722146352	-1.08053163736695	0.279905506300879	0.994731562947848
ENSSSCG00000000014	6.43108491076003	0.3752862630933	0.390857730548727	0.960160779131665	0.336974302861192	0.994731562947848
ENSSSCG00000000018	23.1140748492539	-0.118402658689429	0.228597471920485	-0.517952616425321	0.604491329676843	0.994731562947848
ENSSSCG00000000019	93.7829536465546	0.138504250995016	0.14489446681056	0.955897447596129	0.33912404865417	0.994731562947848
ENSSSCG00000000021	0.932526462483179	-0.833491509360765	1.07638930143185	-0.774340202240976	0.438729635555904	0.994731562947848
ENSSSCG00000000025	1.98626761250036	0.0388150769749959	0.637100473462247	0.060924577192762	0.95141927603032	0.994731562947848
ENSSSCG00000000031	10.1768857264599	-0.118372936029338	0.330712371669844	-0.357933195639598	0.720393307746386	0.994731562947848
ENSSSCG00000000033	4.642628028719	0.178833578606578	0.493452984153296	0.362412599274142	0.717043725679126	0.994731562947848
ENSSSCG00000000034	40.8808108952381	-0.134879564896392	0.20323111372703	-0.663675765107283	0.506897853662931	0.994731562947848
ENSSSCG00000000035	0.755319912897453	0.186544561126085	1.12865683951859	0.165280140601153	0.868723489343096	0.994731562947848
ENSSSCG00000000036	32.9867181161947	0.169992802218563	0.198789723899987	0.85513878123845	0.392474322320634	0.994731562947848
ENSSSCG00000000037	129.412184530931	0.133451125577843	0.182723148696944	0.730346026376652	0.46517870102684	0.994731562947848
ENSSSCG00000000038	0.314558520902961	-0.545114442103835	1.55876577590452	-0.349709013714723	0.726557088355785	0.994731562947848
ENSSSCG00000000039	21.0128662091809	0.0398136385695528	0.258933042621201	0.153760362781497	0.877798688013153	0.994731562947848
ENSSSCG00000000040	0.158759300434308	-0.157686731533015	2.20176377300534	-0.0716183695391527	0.942905620836241	0.994731562947848
ENSSSCG00000000045	101.058446908884	0.0164164421639809	0.164187272807995	0.0999860822536392	0.920355374823377	0.994731562947848
ENSSSCG00000000046	344.412931279977	-0.366345294011095	0.211827794182004	-1.72944865628128	0.0837288281775153	0.994731562947848
ENSSSCG00000000050	50.485208266709	-0.0957843990205251	0.191607411258597	-0.499899238716047	0.617146028347834	0.994731562947848
ENSSSCG00000000058	2.15028997232687	-0.177734376022355	0.638718429148101	-0.278267179889283	0.780807268185891	0.994731562947848
ENSSSCG00000000059	9.61010242576381	-0.0467625885243542	0.327879003032426	-0.142621479545397	0.886589132677362	0.994731562947848
ENSSSCG00000000061	43.4676917201813	-0.170427659162852	0.356288988100439	-0.478341079446464	0.632407462700955	0.994731562947848
ENSSSCG00000000063	28.2076410640307	-0.0125967909429901	0.209871894663052	-0.0600213333148498	0.952138643791295	0.994731562947848
ENSSSCG00000000064	67.7947859115917	0.0658708646552608	0.208381530758049	0.31610701973268	0.751921278756093	0.994731562947848
ENSSSCG00000000066	5.11021096304378	-0.127979792209058	0.401374965961453	-0.318853448925235	0.749837645541666	0.994731562947848
ENSSSCG00000000067	0.115877222000554	0.935974038739643	3.05963454045915	0.305910404122704	0.759672864132239	0.994731562947848
ENSSSCG00000000071	645.869311927095	-0.0997671698262714	0.12414447760597	-0.803637598306457	0.421606302415671	0.994731562947848
ENSSSCG00000000072	94.6152151731536	0.0213636024392103	0.167255711945567	0.127730181473043	0.898362504360201	0.994731562947848
ENSSSCG00000000073	32.7823890423787	0.0923537634062146	0.24435850749454	0.377943720286793	0.705472402966983	0.994731562947848
ENSSSCG00000000075	5.65817042901715	-0.263801499050726	0.412260822873717	-0.639889808621309	0.522244240029766	0.994731562947848
ENSSSCG00000000077	14.8724432863028	0.0332136676754997	0.252768985820666	0.131399299513209	0.895459442766713	0.994731562947848
ENSSSCG00000000078	85.8581790426166	-0.0880672970564278	0.150325462008778	-0.58584418021802	0.557980231310535	0.994731562947848
ENSSSCG00000000079	0.306490468691366	-0.164028031240717	1.69510118943969	-0.0967659230390462	0.922912286373366	0.994731562947848
ENSSSCG00000000080	0.801599186095287	-0.586212696013377	1.11212896400544	-0.527108559336565	0.598118203164625	0.994731562947848
ENSSSCG00000000083	26.9804615280571	-0.401221098215876	0.301200707032038	-1.33207223239751	0.182836453837765	0.994731562947848
ENSSSCG00000000084	214.759535131614	-0.060831324365717	0.206613285948478	-0.294421165059474	0.768436095875336	0.994731562947848
ENSSSCG00000000087	23.5676841867513	-0.1177958304321	0.229517665179148	-0.513232087561345	0.607788982895935	0.994731562947848
ENSSSCG00000000091	2.89930378953882	-0.777444311800491	0.617307551539342	-1.25941163341	0.207881689656717	0.994731562947848
ENSSSCG00000000092	0.141344085941771	-0.891117318245809	2.63618025391538	-0.338033530492567	0.735337919841526	0.994731562947848
ENSSSCG00000000093	11.0900938415959	0.131051683016496	0.327654944394298	0.3999685805406	0.689179658622211	0.994731562947848
ENSSSCG00000000094	116.25511780692	0.161048662339818	0.232651820742738	0.692230397448308	0.48879265212002	0.994731562947848
ENSSSCG00000000095	19.4133305678089	0.0953220133253861	0.235143132037224	0.405378683610867	0.685199177316579	0.994731562947848
ENSSSCG00000000097	126.623004710218	-0.0252276960897389	0.145356270536591	-0.173557673133807	0.862213099018718	0.994731562947848
ENSSSCG00000000103	0.159371357838489	-0.868657405099234	2.19801457409773	-0.395200930574272	0.692694605966997	0.994731562947848
ENSSSCG00000000104	440.141566131827	0.0498957127515055	0.110723249697041	0.450634468262349	0.65225302007806	0.994731562947848
ENSSSCG00000000105	8.62161912947488	-0.217025390058097	0.337299340865036	-0.643420735722504	0.519951132106972	0.994731562947848
ENSSSCG00000000107	12.6666418399685	0.0455021126135363	0.285298466343329	0.15948951004447	0.873283222307613	0.994731562947848
ENSSSCG00000000108	8.64237311367796	0.157382098263238	0.31585438572213	0.498274221848842	0.618290774576523	0.994731562947848
ENSSSCG00000000110	2.17679588120213	0.618916433685419	0.764298471817694	0.809783685964306	0.418064510486216	0.994731562947848
ENSSSCG00000000111	0.0976488361359357	-0.518360598299771	3.06038250977364	-0.169377715577819	0.865499550639651	0.994731562947848
ENSSSCG00000000114	2.88563429911205	-0.236009675872563	0.597058115589231	-0.395287610553032	0.692630641830311	0.994731562947848
ENSSSCG00000000116	23.0758264377096	-0.0938268152101077	0.338626502582058	-0.277080543001418	0.781718261580847	0.994731562947848
ENSSSCG00000000117	1.7523063260106	0.220449288315863	0.668471333119757	0.329781214830898	0.741565282455096	0.994731562947848
ENSSSCG00000000118	0.293630859639515	1.23070799826669	1.54803692455674	0.795012043152057	0.426606496707573	0.994731562947848
ENSSSCG00000000119	101.575076428969	-0.345011036391883	0.163921236727688	-2.10473666060139	0.0353142373949511	0.994731562947848
ENSSSCG00000000120	4.90860826420103	-0.281430789347783	0.463024877555738	-0.607809219308968	0.543314013987589	0.994731562947848
ENSSSCG00000000121	0.0372208994596494	0.563647170019878	3.06038250977364	0.184175399061984	0.853875858043919	0.994731562947848
ENSSSCG00000000130	4.91230512035026	0.206449724856814	0.433403988213846	0.476344774093195	0.63382877206351	0.994731562947848
ENSSSCG00000000132	1.5523185597858	1.35114945904729	0.807367534097037	1.67352463653177	0.0942240607250734	0.994731562947848
ENSSSCG00000000133	425.298532397928	-0.275591507031599	0.167304819352749	-1.64724189116475	0.0995083364940327	0.994731562947848
ENSSSCG00000000136	17.1034667911161	-0.438267111330985	0.394674090218207	-1.11045321239272	0.266803778989406	0.994731562947848
ENSSSCG00000000137	7.9444026523418	-0.363946023299218	0.355324307762206	-1.02426435610699	0.305710428734133	0.994731562947848
ENSSSCG00000000138	0.203260286640982	0.573361671776418	2.04830957791229	0.27991944086929	0.779539311564271	0.994731562947848
ENSSSCG00000000139	5.68663038865997	-0.650753211812725	0.414212986460394	-1.57105941407984	0.116168848734056	0.994731562947848
ENSSSCG00000000141	72.6056458275425	-0.544652729983347	0.207165261766544	-2.62907364554738	0.0085617817040803	0.994731562947848
ENSSSCG00000000142	4.46860331731807	-0.381595208935846	0.462442030043467	-0.825174149719865	0.409272727235655	0.994731562947848
ENSSSCG00000000144	88.6810118089882	0.0259059881201322	0.128001640338069	0.20238793855853	0.839613456935796	0.994731562947848
ENSSSCG00000000145	10.0727648346154	-0.0225223934209424	0.31884796763532	-0.0706367789889829	0.943686838107891	0.994731562947848
ENSSSCG00000000146	4.03115024404443	0.776737307686164	0.644781133235452	1.20465266064559	0.228337418242017	0.994731562947848
ENSSSCG00000000148	1.74184674717137	0.312861083247915	0.698944264582793	0.447619501441455	0.654427826471749	0.994731562947848
ENSSSCG00000000151	0.159311475472336	0.93585510612721	2.95061848357674	0.317172522078411	0.751112698543591	0.994731562947848
ENSSSCG00000000152	39.583412829259	0.151050859571679	0.182513917281686	0.82761282986739	0.407889799999008	0.994731562947848
ENSSSCG00000000156	28.735713464836	0.282785301763273	0.253738074186086	1.11447721304878	0.265074514826402	0.994731562947848
ENSSSCG00000000157	2.30320958406743	-0.470707531048959	0.608692521139359	-0.773309207361185	0.439339407978872	0.994731562947848
ENSSSCG00000000158	99.7346399795648	-0.123735621114562	0.17645226048198	-0.701241348660412	0.483152409360415	0.994731562947848
ENSSSCG00000000160	8.0358189389491	0.519825081091222	0.349754391631221	1.48625748104779	0.137211028609097	0.994731562947848
ENSSSCG00000000161	23.0478785200081	-0.201601998827388	0.283306185454429	-0.711604649591446	0.476709627018445	0.994731562947848
ENSSSCG00000000162	1.26429770597177	0.146940172155272	0.785928546603382	0.186963780346593	0.851689031249042	0.994731562947848
ENSSSCG00000000164	25.6289032951492	-0.14168044278532	0.27749146799395	-0.510575852330023	0.6096480882636	0.994731562947848
ENSSSCG00000000167	4.72239052122908	-0.0653636472372597	0.441210858794158	-0.148146052923313	0.882227505425895	0.994731562947848
ENSSSCG00000000169	24.6728699932381	0.225260443427311	0.224936275886939	1.00144115278469	0.316613576849997	0.994731562947848
ENSSSCG00000000171	0.926952414850593	-0.663765143109197	1.13112708504439	-0.58681747779309	0.557326297219	0.994731562947848
ENSSSCG00000000175	0.0488244180679678	-0.157691905206694	3.06038250977364	-0.0515268613328854	0.958905698028026	0.994731562947848
ENSSSCG00000000176	4.13644956945849	-0.480069907625296	0.466330512614367	-1.02946278366797	0.303262259482939	0.994731562947848
ENSSSCG00000000179	0.585361995720942	-0.873635707981077	1.32742571574582	-0.658142823073319	0.510446361078988	0.994731562947848
ENSSSCG00000000182	0.387135494648805	1.00014126397166	1.51515782908111	0.660090483496501	0.509195765318803	0.994731562947848
ENSSSCG00000000185	55.8759806532248	-0.138991946773525	0.242300618966605	-0.573634303396813	0.566215293610456	0.994731562947848
ENSSSCG00000000186	1.29511342549146	0.384954220746979	0.824164796577117	0.467084037495599	0.640439754161644	0.994731562947848
ENSSSCG00000000188	0.0700083978008061	0.563647170019878	3.06038250977364	0.184175399061984	0.853875858043919	0.994731562947848
ENSSSCG00000000189	25.2853274993544	-0.195559942882887	0.260391328297958	-0.751023254734174	0.452638660674076	0.994731562947848
ENSSSCG00000000190	77.4098124789156	-0.166515089083011	0.202828821238596	-0.820963648391628	0.411666974588378	0.994731562947848
ENSSSCG00000000191	0.345101460535106	-1.18666185238282	1.50468730889622	-0.788643491153857	0.430320404139378	0.994731562947848
ENSSSCG00000000194	44.6218875441917	0.202369624885949	0.330824652948765	0.611712649230196	0.540727891399697	0.994731562947848
ENSSSCG00000000195	0.584475863762008	0.200492240923264	1.19218269734012	0.168172412978801	0.866447643082735	0.994731562947848
ENSSSCG00000000198	155.563480905312	-0.0575949886203566	0.139454284889864	-0.413002645747622	0.679604675309714	0.994731562947848
ENSSSCG00000000199	3.37223467064433	0.122104656779891	0.528823784987527	0.23089857197473	0.817393600162033	0.994731562947848
ENSSSCG00000000203	0.10094398972121	-0.518360598299771	3.06038250977364	-0.169377715577819	0.865499550639651	0.994731562947848
ENSSSCG00000000204	3.64356645534855	-0.223960219783784	0.500520056842713	-0.447455035461571	0.654546546448398	0.994731562947848
ENSSSCG00000000206	0.0643693610981611	0.563647170019878	3.06038250977364	0.184175399061984	0.853875858043919	0.994731562947848
ENSSSCG00000000207	295.661148530412	0.151176300728951	0.334675120291989	0.451710603994275	0.65147747806397	0.994731562947848
ENSSSCG00000000209	1.09106158032309	-1.05758353823858	0.959533678863507	-1.10218490662173	0.270381292389633	0.994731562947848
ENSSSCG00000000212	0.114051434981982	0.202980520767743	2.79436172566702	0.0726393146969158	0.942093140736155	0.994731562947848
ENSSSCG00000000214	142.687453458944	-0.137236971792839	0.146344984467294	-0.937763410836329	0.34836600837773	0.994731562947848
ENSSSCG00000000215	41.0787020806883	-0.179449997774151	0.185812663291199	-0.965757632422087	0.334165473318158	0.994731562947848
ENSSSCG00000000216	0.128738722196322	0.935974038739643	3.05963454045915	0.305910404122704	0.759672864132239	0.994731562947848
ENSSSCG00000000217	0.854000386165757	-1.47727339179647	1.03356312633327	-1.42930156287341	0.152917577007501	0.994731562947848
ENSSSCG00000000223	9.72084546172458	0.127532930894924	0.323194932000257	0.394600652014005	0.69313763226503	0.994731562947848
ENSSSCG00000000228	22.8306566070992	-0.0401108497231676	0.279633707064743	-0.143440682256095	0.885942155358423	0.994731562947848
ENSSSCG00000000231	0.603506218425639	0.192793721259758	1.11636505166493	0.17269773984077	0.862889020445079	0.994731562947848
ENSSSCG00000000232	23.0056168534443	0.154573451012539	0.26510890881621	0.583056418974209	0.559855320469889	0.994731562947848
ENSSSCG00000000233	13.1113388889525	-0.0199456955655692	0.327643012454521	-0.0608763038043968	0.951457721261385	0.994731562947848
ENSSSCG00000000234	3.67721087060604	0.0876820665529198	0.612169971182585	0.143231570773614	0.886107297000377	0.994731562947848
ENSSSCG00000000252	73.538642851217	-0.0834075707338379	0.265054982898999	-0.31468025924878	0.753004434185917	0.994731562947848
ENSSSCG00000000253	81.0070498096683	0.257160753975326	0.259040463786388	0.992743566840537	0.320834937696423	0.994731562947848
ENSSSCG00000000257	11.3856555986205	0.201965096266545	0.349496180611381	0.57787497395034	0.563348532525618	0.994731562947848
ENSSSCG00000000258	1.43605835932978	-0.8900847729005	0.91730120621345	-0.970329883871736	0.331882086069484	0.994731562947848
ENSSSCG00000000259	33.5304577469947	-0.111509345435629	0.239519911356246	-0.46555355170359	0.641535096725455	0.994731562947848
ENSSSCG00000000260	23.9510866700419	-0.242367376223465	0.257740454168475	-0.940354423621207	0.347035791991789	0.994731562947848
ENSSSCG00000000261	2.20801867416968	0.0439325766383434	0.749368737992803	0.0586261134351795	0.953249910937231	0.994731562947848
ENSSSCG00000000262	45.1475709447283	-0.231482187809851	0.187246839061789	-1.23624083039108	0.216369057750481	0.994731562947848
ENSSSCG00000000263	0.0504719948606048	-0.157691905206694	3.06038250977364	-0.0515268613328854	0.958905698028026	0.994731562947848
ENSSSCG00000000264	17.4347332326087	-0.0622275663722426	0.265334185208469	-0.234525250952309	0.814577232308869	0.994731562947848
ENSSSCG00000000265	0.0488244180679678	-0.157691905206694	3.06038250977364	-0.0515268613328854	0.958905698028026	0.994731562947848
ENSSSCG00000000267	95.2655418903943	-0.351015147808515	0.210021086764341	-1.67133288002828	0.0946559453967989	0.994731562947848
ENSSSCG00000000268	0.191475850001636	-1.1970901369221	2.10439052256737	-0.568853605870476	0.569455492261028	0.994731562947848
ENSSSCG00000000272	3.28739407011842	-0.126759607175334	0.499594923549386	-0.253724770209367	0.799708196259135	0.994731562947848
ENSSSCG00000000273	318.666922035419	-0.183916322793152	0.141290822328724	-1.30168626498087	0.193023656741103	0.994731562947848
ENSSSCG00000000274	21.4377581545671	-0.366838848578752	0.308898456491697	-1.18757099904321	0.2350024691764	0.994731562947848
ENSSSCG00000000275	4.26647025767802	0.130091197963154	0.475088690954052	0.273825078222575	0.784219050296809	0.994731562947848
ENSSSCG00000000276	17.8020378575656	-0.192525082061062	0.241092548713912	-0.79855260184552	0.424549880612955	0.994731562947848
ENSSSCG00000000277	1.92736475925758	-0.162749433642033	0.694274406728712	-0.234416582355206	0.814661586390648	0.994731562947848
ENSSSCG00000000278	4.42883761809969	0.20372974776118	0.463445924708593	0.439597668032753	0.660228529986568	0.994731562947848
ENSSSCG00000000288	12.0910016947149	-0.0807259316275613	0.327698283404985	-0.246342247474627	0.805417308601068	0.994731562947848
ENSSSCG00000000290	80.9643899886639	-0.124713734049582	0.172910190411832	-0.721263065829396	0.470747676453402	0.994731562947848
ENSSSCG00000000291	0.0504719948606048	-0.157691905206694	3.06038250977364	-0.0515268613328854	0.958905698028026	0.994731562947848
ENSSSCG00000000292	0.707123991185384	-0.159602986687313	1.16204364167295	-0.137346809503246	0.890756672356188	0.994731562947848
ENSSSCG00000000293	3.982666323675	0.327385479147824	0.483675791913234	0.676869681347529	0.498488642068263	0.994731562947848
ENSSSCG00000000295	18.0206261205937	-0.344451595746853	0.243347112858771	-1.41547434732361	0.156929464561162	0.994731562947848
ENSSSCG00000000297	0.512040648394643	-0.637526745224084	1.25273567904227	-0.508907629829365	0.610816971657527	0.994731562947848
ENSSSCG00000000298	34.7135855897208	-0.504151831343585	0.238443345875746	-2.11434640581793	0.0344856915485946	0.994731562947848
ENSSSCG00000000299	0.343435633002494	0.6032756572999	1.65736246281993	0.363997418086478	0.715859937397647	0.994731562947848
ENSSSCG00000000359	1.31329040180303	0.967911545717271	0.877710899081172	1.10276806033801	0.270127901765239	0.994731562947848
ENSSSCG00000000361	1035.58730348538	-0.0948670926557585	0.128297997670377	-0.739427694729041	0.459647330427367	0.994731562947848
ENSSSCG00000000363	1.11450738130736	-0.415435058753174	0.925958097084649	-0.448654275027303	0.653681074423083	0.994731562947848
ENSSSCG00000000364	40.8760159070999	-0.0812114970253967	0.172437078092447	-0.470963077800804	0.637667101813343	0.994731562947848
ENSSSCG00000000365	43.0138755500023	0.244695126352411	0.175734783751326	1.39241145736218	0.163797836942479	0.994731562947848
ENSSSCG00000000366	4.45917167240558	-0.419333141789768	0.467335869777685	-0.897284306443774	0.369567228489546	0.994731562947848
ENSSSCG00000000368	0.485847430801045	-1.23372945575704	1.18534624022634	-1.04081779136656	0.297960121259047	0.994731562947848
ENSSSCG00000000370	1.51902284718744	-0.640768552903455	0.798571407545573	-0.802393557857113	0.422325338399452	0.994731562947848
ENSSSCG00000000371	0.118832815868774	0.202980791566415	2.75719029177876	0.0736187096594863	0.941313783380359	0.994731562947848
ENSSSCG00000000373	15.5714307114625	0.128017092309748	0.397331470137969	0.322192179404505	0.747307108797417	0.994731562947848
ENSSSCG00000000374	411.130642545956	-0.0214347641734802	0.14611320003056	-0.146699710696891	0.883369046964581	0.994731562947848
ENSSSCG00000000376	62.8739008030447	0.163669887300542	0.206106276835134	0.794104332064874	0.427134695873089	0.994731562947848
ENSSSCG00000000377	130.125144667562	-0.117515061601259	0.214407599453617	-0.548091867549133	0.58362882437581	0.994731562947848
ENSSSCG00000000379	0.0744417989192988	0.901547010715773	3.05987602153388	0.294635143506186	0.76827261262798	0.994731562947848
ENSSSCG00000000382	14.3073734633613	-0.0767990066562435	0.299231043263487	-0.256654542986766	0.79744546568589	0.994731562947848
ENSSSCG00000000383	5.31686220265903	-0.226199712037879	0.467427925829011	-0.483924257706042	0.628439624067519	0.994731562947848
ENSSSCG00000000384	0.212149961293962	-0.528143721018275	1.82410830743109	-0.289535286291233	0.772171781076251	0.994731562947848
ENSSSCG00000000385	91.3095634797361	-0.167745513913788	0.186371667500752	-0.900059092475047	0.368088804257776	0.994731562947848
ENSSSCG00000000386	0.646340907972975	0.740351417017317	1.18316935290176	0.625735796149202	0.531488250010628	0.994731562947848
ENSSSCG00000000393	8.27980663595365	-0.355799578439034	0.457353925953773	-0.777952387086311	0.436597082871754	0.994731562947848
ENSSSCG00000000394	99.7083144647713	-0.0193156136213891	0.143491805631283	-0.134611266033007	0.892919233680553	0.994731562947848
ENSSSCG00000000398	0.376725191492821	-0.49355849529592	1.49740950119951	-0.329608230013602	0.74169600317922	0.994731562947848
ENSSSCG00000000399	3.14210398858889	-0.120855254438666	0.691013920371045	-0.174895542442578	0.861161712907003	0.994731562947848
ENSSSCG00000000400	4.61937016152476	-0.300011015956553	0.495936210727004	-0.604938718866203	0.545219715368831	0.994731562947848
ENSSSCG00000000401	0.933454031522057	0.136762181729636	0.989583022665071	0.138201827029447	0.890080911193965	0.994731562947848
ENSSSCG00000000402	17.8203516800496	-0.182585935253646	0.237366584452467	-0.769214991549114	0.441765692179369	0.994731562947848
ENSSSCG00000000403	47.1092200836094	0.277905829217295	0.207494915779329	1.33933801786666	0.180460657480704	0.994731562947848
ENSSSCG00000000405	210.594742483904	-0.0862382969811721	0.128501435595504	-0.671107654023666	0.502151951330986	0.994731562947848
ENSSSCG00000000406	109.690955169664	0.0208281182061865	0.153120830348188	0.136024067782447	0.891802254457363	0.994731562947848
ENSSSCG00000000411	1.44516562320718	-0.547941414551191	0.823932231092129	-0.665032139627418	0.50602993661545	0.994731562947848
ENSSSCG00000000413	0.187991114428328	0.573514376782668	2.09451846351336	0.27381681602398	0.784225400014906	0.994731562947848
ENSSSCG00000000415	14.1954253095878	-0.428619435847906	0.30070301307129	-1.42539122395255	0.154044143489551	0.994731562947848
ENSSSCG00000000418	0.232316899550211	-0.509290147486512	1.78329396597081	-0.285589564707162	0.775192496886727	0.994731562947848
ENSSSCG00000000419	36.0193135504004	-0.307340342278117	0.284581949407678	-1.07997131553076	0.280154953770268	0.994731562947848
ENSSSCG00000000423	7.0129030234286	-0.382752881047276	0.404383418259266	-0.946509831424091	0.343888610155766	0.994731562947848
ENSSSCG00000000431	0.161250493436157	-0.157686698017044	2.19187287427781	-0.0719415345057358	0.942648435908952	0.994731562947848
ENSSSCG00000000433	3.44278379293255	-0.108617961828728	0.502594684156741	-0.21611442630152	0.828898554860393	0.994731562947848
ENSSSCG00000000435	3.74115163530223	0.0728745827214627	0.557828813406211	0.130639689040938	0.896060344451548	0.994731562947848
ENSSSCG00000000436	0.153754619591939	0.202982319531598	2.5372677409142	0.0800003548141362	0.936236973775782	0.994731562947848
ENSSSCG00000000437	0.100633342097899	-0.157691905206694	3.06038250977364	-0.0515268613328854	0.958905698028026	0.994731562947848
ENSSSCG00000000439	0.24197742803967	-1.22345797660311	1.97259669374671	-0.62022712523121	0.535108265500725	0.994731562947848
ENSSSCG00000000443	0.304514186970406	-1.05467377170704	1.90073107913152	-0.554877953691873	0.578978142404775	0.994731562947848
ENSSSCG00000000444	150.199413090438	-0.137938937864197	0.150405150545242	-0.917115786022931	0.359081969783971	0.994731562947848
ENSSSCG00000000449	2.80984623049247	0.748307535833458	0.665933335425435	1.12369736732791	0.261141433661159	0.994731562947848
ENSSSCG00000000453	32.7955386782334	0.239693157094925	0.242500602555027	0.988422934085433	0.322945560153517	0.994731562947848
ENSSSCG00000000455	0.552345504567889	0.498354804927789	1.4937528836589	0.333626003591094	0.738661793448314	0.994731562947848
ENSSSCG00000000458	32.9364177033511	0.0148920981198323	0.212908049581114	0.0699461488146258	0.944236521608741	0.994731562947848
ENSSSCG00000000461	0.33920390855583	-0.401597783934944	1.68154802925312	-0.238826234486635	0.81124032660497	0.994731562947848
ENSSSCG00000000462	4.56704075685329	0.360779532679689	0.474977175226486	0.759572357361501	0.447510247579782	0.994731562947848
ENSSSCG00000000464	0.0643693610981611	0.563647170019878	3.06038250977364	0.184175399061984	0.853875858043919	0.994731562947848
ENSSSCG00000000466	48.4961495526855	-0.256488256217085	0.171822757707097	-1.49274903767006	0.13550289185572	0.994731562947848
ENSSSCG00000000469	14.3769410018614	0.578745350019203	0.247445518238475	2.33887990430863	0.0193416498070045	0.994731562947848
ENSSSCG00000000473	64.8007502017037	0.0467303869302114	0.24143942048927	0.19354911818258	0.846528942466187	0.994731562947848
ENSSSCG00000000475	2.83250487418434	-0.0940461627742475	0.556969828238027	-0.16885324483691	0.865912076235729	0.994731562947848
ENSSSCG00000000477	6.07019368816492	0.129582101970617	0.400552001601952	0.323508811471097	0.746309935422155	0.994731562947848
ENSSSCG00000000478	3.01153390134722	-0.184363825075681	0.548539859258435	-0.336099231375675	0.73679603801777	0.994731562947848
ENSSSCG00000000482	0.0404223133994059	-0.157691905206694	3.06038250977364	-0.0515268613328854	0.958905698028026	0.994731562947848
ENSSSCG00000000483	0.215924443480499	0.195844771161271	1.81700876515795	0.107784164235579	0.914166904811283	0.994731562947848
ENSSSCG00000000484	15.4339554096033	-0.123883259409836	0.320263926546599	-0.386816151121569	0.698892319373894	0.994731562947848
ENSSSCG00000000486	3.84895239382837	-0.524465984906279	0.535912177087594	-0.978641664304925	0.327757065203509	0.994731562947848
ENSSSCG00000000487	5.67885165444438	0.146317643308804	0.381345443180302	0.383687928951137	0.701209760419786	0.994731562947848
ENSSSCG00000000492	4.50573265372067	0.970930632495024	0.503775793267031	1.92730703910653	0.0539413768800235	0.994731562947848
ENSSSCG00000000493	31.2481646070925	0.0952585231214858	0.2081570119903	0.457628221171454	0.647219564713099	0.994731562947848
ENSSSCG00000000499	0.502412568005797	-1.1301111270732	1.46991309211549	-0.768828533560951	0.441995107634209	0.994731562947848
ENSSSCG00000000500	12.2323030965236	-0.0500281105281843	0.287968402544052	-0.17372777737492	0.862079406278939	0.994731562947848
ENSSSCG00000000502	25.5817989672678	0.209569557992587	0.197352272367561	1.06190597898094	0.288278370508044	0.994731562947848
ENSSSCG00000000504	46.2859004036796	-0.0808746557851699	0.235583777234857	-0.343294673064626	0.731376787873438	0.994731562947848
ENSSSCG00000000510	284.072066592737	0.0507772141707476	0.118032598455442	0.430196529053931	0.667052686652719	0.994731562947848
ENSSSCG00000000512	45.58321511627	0.233165410310334	0.182932706092733	1.2745966278558	0.202452051673578	0.994731562947848
ENSSSCG00000000515	8.88140409362337	0.095276563495735	0.401407822744569	0.237356020727984	0.8123806052684	0.994731562947848
ENSSSCG00000000519	4.04878855978912	-0.283165177567786	0.472283816098148	-0.599565701630859	0.548795711008219	0.994731562947848
ENSSSCG00000000522	134.384898361379	-0.0716466109015099	0.119885077402418	-0.59762743165285	0.550088556288854	0.994731562947848
ENSSSCG00000000523	0.899232887352698	0.791453430417398	1.02358579519215	0.773216504307605	0.439394260181191	0.994731562947848
ENSSSCG00000000528	64.0172860576938	0.0472725696070732	0.217072029433665	0.217773656653997	0.827605470901297	0.994731562947848
ENSSSCG00000000529	6.28416900343837	0.506927320491736	0.402755957621279	1.25864636115057	0.208158093589071	0.994731562947848
ENSSSCG00000000530	148.434592143511	0.0695043689243157	0.197892409129023	0.351223016740373	0.725421043843223	0.994731562947848
ENSSSCG00000000531	2.20802053798687	0.405907424890139	0.68615964766903	0.591564115244983	0.554142509483987	0.994731562947848
ENSSSCG00000000534	38.6680811497536	-0.189153560687459	0.220196840417921	-0.859020321674262	0.390329304422727	0.994731562947848
ENSSSCG00000000536	14.6913948608226	0.0489489251178563	0.294164847985788	0.166399641061876	0.867842456407597	0.994731562947848
ENSSSCG00000000540	0.100633342097899	-0.157691905206694	3.06038250977364	-0.0515268613328854	0.958905698028026	0.994731562947848
ENSSSCG00000000541	3.5276832526359	-0.147553708073986	0.554137973835523	-0.266276117214414	0.790026565028833	0.994731562947848
ENSSSCG00000000545	3.24055894769618	-0.596299438534736	0.53345149067122	-1.1178138011845	0.263646525865436	0.994731562947848
ENSSSCG00000000546	0.0724844478316902	0.563647170019878	3.06038250977364	0.184175399061984	0.853875858043919	0.994731562947848
ENSSSCG00000000547	31.1967800666844	0.36962459987239	0.29117101067904	1.26944162130147	0.204283599459333	0.994731562947848
ENSSSCG00000000549	39.3064508347663	0.393373118479541	0.1891422021622	2.07977444474397	0.0375462261370947	0.994731562947848
ENSSSCG00000000551	0.0436952498058356	-0.157691905206694	3.06038250977364	-0.0515268613328854	0.958905698028026	0.994731562947848
ENSSSCG00000000552	11.835344975792	0.042380943097697	0.302652106495679	0.140031878807697	0.888634802887445	0.994731562947848
ENSSSCG00000000553	47.3160948397405	0.112688891998549	0.251909514338755	0.447338768820819	0.654630478942437	0.994731562947848
ENSSSCG00000000555	71.2135103260524	0.0350849391548873	0.142419406991695	0.246349425938371	0.805411752198334	0.994731562947848
ENSSSCG00000000559	18.2899980650213	0.33528390686834	0.253609053297273	1.32205022852765	0.186151425716244	0.994731562947848
ENSSSCG00000000563	2.00497935635451	-0.201239643734636	0.87590299117564	-0.229751063487672	0.818285213153715	0.994731562947848
ENSSSCG00000000567	6.11891834412162	-0.232646081199962	0.413549025535666	-0.562559858286736	0.573734632733715	0.994731562947848
ENSSSCG00000000570	7.89424876186147	0.354626167265075	0.341743670680349	1.03769637213494	0.299411434484371	0.994731562947848
ENSSSCG00000000571	11.9856971194136	-0.359162824991125	0.293863273747552	-1.2222106573946	0.2216279746778	0.994731562947848
ENSSSCG00000000573	2.99866547986794	0.178954024967384	0.595189343008305	0.300667387730575	0.76366813952099	0.994731562947848
ENSSSCG00000000576	209.775323571087	-0.0606990967196335	0.230799146007333	-0.262995326324583	0.792554181407795	0.994731562947848
ENSSSCG00000000577	456.774655624849	0.0215059827734919	0.218737600024015	0.0983186373587842	0.921679279408255	0.994731562947848
ENSSSCG00000000579	8.94503427559674	0.293157654487019	0.359430464283898	0.815617159973025	0.414719131839624	0.994731562947848
ENSSSCG00000000580	1.56613574062862	-0.426899466909212	0.78326912829092	-0.54502271504138	0.585737895032006	0.994731562947848
ENSSSCG00000000582	0.100633342097899	-0.157691905206694	3.06038250977364	-0.0515268613328854	0.958905698028026	0.994731562947848
ENSSSCG00000000583	10.1126514514327	0.383140132376514	0.324450037137853	1.18089101100557	0.237646022731541	0.994731562947848
ENSSSCG00000000584	99.7227005087729	0.0885559206168191	0.125693741099302	0.70453723345586	0.481098271146819	0.994731562947848
ENSSSCG00000000585	0.174815248196094	1.25183180426976	2.13239562257981	0.58705419904927	0.557167306612589	0.994731562947848
ENSSSCG00000000587	17.2317982699163	-0.193518309692071	0.259195303635529	-0.74661194465232	0.4552978361637	0.994731562947848
ENSSSCG00000000588	9.34112678729181	0.729065027060943	0.343805536323897	2.12057384199333	0.0339576813566002	0.994731562947848
ENSSSCG00000000591	8.88369278961332	-0.128816667472574	0.387949633536903	-0.332044823185327	0.739855413212602	0.994731562947848
ENSSSCG00000000599	6.50196317119107	-0.36142509579519	0.591658327837277	-0.610867926284969	0.54128701995415	0.994731562947848
ENSSSCG00000000600	7.17211174961921	-0.0778267681408759	0.416337228789668	-0.18693204152587	0.851713916478841	0.994731562947848
ENSSSCG00000000601	1.3108987193907	-0.23759839176131	0.83968770175799	-0.282960428340046	0.777207171420255	0.994731562947848
ENSSSCG00000000602	5.25830213460458	-0.675325840197112	0.486460044089077	-1.38824523905493	0.165062380973993	0.994731562947848
ENSSSCG00000000607	17.585051191703	0.394962327869796	0.31376348461988	1.25878997152357	0.208106203551047	0.994731562947848
ENSSSCG00000000608	0.453166338874249	0.359793555830911	1.49250570697624	0.241066787315566	0.809503353644691	0.994731562947848
ENSSSCG00000000610	0.134725546274307	0.935441599711027	2.64640415417483	0.353476470415648	0.723731265610158	0.994731562947848
ENSSSCG00000000611	69.5213740096312	0.107020904721896	0.162532081062859	0.658460188425851	0.510242470830675	0.994731562947848
ENSSSCG00000000612	51.1643575191598	0.236348455275633	0.179835868516269	1.31424535731175	0.188763649207219	0.994731562947848
ENSSSCG00000000614	0.192964840493101	0.573463747862355	2.07886027295812	0.275854878426409	0.782659531440474	0.994731562947848
ENSSSCG00000000622	15.5545820372325	-0.473383183797742	0.37578682668689	-1.25971202335991	0.207773266453986	0.994731562947848
ENSSSCG00000000623	1.0326659085675	0.850410359430794	0.919466937166712	0.924894985404573	0.355020535309234	0.994731562947848
ENSSSCG00000000625	14.9579229733688	-0.160714462483037	0.294646968673257	-0.545447534066633	0.585445755590744	0.994731562947848
ENSSSCG00000000635	9.35429296331281	-0.112435441663172	0.312552789278092	-0.359732645236877	0.719047076746176	0.994731562947848
ENSSSCG00000000639	5.37882587008226	0.0884338326528869	0.441753844045702	0.200188031965915	0.841333526834758	0.994731562947848
ENSSSCG00000000640	6.76669017334292	0.549167010269676	0.428106645826088	1.28278085758278	0.199568862400814	0.994731562947848
ENSSSCG00000000645	546.58229550504	0.105322948899331	0.135152683770952	0.779288623508399	0.43580971468601	0.994731562947848
ENSSSCG00000000647	0.229319702368295	0.195930386513658	1.78971497127988	0.109475748740897	0.912825155843716	0.994731562947848
ENSSSCG00000000648	0.590796852887753	0.750104940859331	1.18164956820536	0.634794748834513	0.525562288553191	0.994731562947848
ENSSSCG00000000649	2.89426317725534	-0.487639331616637	0.57257152513554	-0.851665355697181	0.394399854257165	0.994731562947848
ENSSSCG00000000650	0.0679250454452981	-0.157691905206694	3.06038250977364	-0.0515268613328854	0.958905698028026	0.994731562947848
ENSSSCG00000000651	0.369193476508638	0.951510155774131	1.6531409283617	0.575577157064944	0.564901024732559	0.994731562947848
ENSSSCG00000000653	2.18513408799248	-0.547185051317331	0.646601596065683	-0.846247603851795	0.397414630745645	0.994731562947848
ENSSSCG00000000656	0.903828310181367	1.22299280736413	1.17257781272602	1.04299500987564	0.296950603915161	0.994731562947848
ENSSSCG00000000657	58.1227611383023	-0.276412698438842	0.226854575684664	-1.21845767317943	0.223050100075031	0.994731562947848
ENSSSCG00000000659	2.64284147270868	0.668727692101888	0.646169911471916	1.03490998300832	0.300710952022547	0.994731562947848
ENSSSCG00000000660	1205.55409525729	-0.357770863582222	0.205388579690349	-1.74192189323092	0.0815221124534165	0.994731562947848
ENSSSCG00000000663	1.57392957126893	-0.833907535368483	0.906487437430781	-0.919932809804835	0.357607872069106	0.994731562947848
ENSSSCG00000000664	0.128480155804136	0.202981284604697	2.68819338578071	0.0755084383729136	0.939810183855054	0.994731562947848
ENSSSCG00000000665	0.985689149261994	1.88940639650587	1.07233457974614	1.76195604636117	0.0780767240264445	0.994731562947848
ENSSSCG00000000667	0.299720968749324	0.969864217291945	1.88156430383541	0.515456322866543	0.606234183255827	0.994731562947848
ENSSSCG00000000670	0.261547447608711	0.478077185731961	1.75977433115792	0.271669598349801	0.785876079380732	0.994731562947848
ENSSSCG00000000672	0.322070804053661	-0.479579872126861	1.54548274992157	-0.310310724691814	0.756324676305944	0.994731562947848
ENSSSCG00000000675	2387.66581180227	-0.0313827858375523	0.146694297310325	-0.213933236758097	0.830599121009195	0.994731562947848
ENSSSCG00000000680	0.0679250454452981	-0.157691905206694	3.06038250977364	-0.0515268613328854	0.958905698028026	0.994731562947848
ENSSSCG00000000681	0.795062367546009	-0.596581432109222	1.08725386353965	-0.548704816892533	0.583208039987437	0.994731562947848
ENSSSCG00000000683	1.14378161562326	0.743627225573483	0.955387516554975	0.778351415198436	0.436361872497101	0.994731562947848
ENSSSCG00000000684	7.43684148280638	-0.504992652281879	0.409483481894791	-1.2332430357023	0.217485103589811	0.994731562947848
ENSSSCG00000000687	1.88894707867215	-0.82590719037335	0.756512869135291	-1.09172920127238	0.274952146032533	0.994731562947848
ENSSSCG00000000688	0.20387259195778	0.195765087371537	1.84363848450247	0.106184096837383	0.915436288492169	0.994731562947848
ENSSSCG00000000690	14.5390841557218	-0.0537648690782124	0.339255987028175	-0.158478762745452	0.874079554052785	0.994731562947848
ENSSSCG00000000691	0.565208391234051	0.659688539596019	1.23848679923024	0.532656900344871	0.594271106168925	0.994731562947848
ENSSSCG00000000693	2.69349791530378	1.40930387447852	0.599960393769193	2.34899484885112	0.0188241672286702	0.994731562947848
ENSSSCG00000000694	389.856326808162	-0.269059584152884	0.151810201974389	-1.7723419154549	0.076337817349782	0.994731562947848
ENSSSCG00000000696	12.3899950165073	-0.306175159857794	0.340111475989698	-0.900220020411979	0.368003173913914	0.994731562947848
ENSSSCG00000000697	176.842434897455	0.0225300454307552	0.169666265254479	0.132790365821767	0.894359173841672	0.994731562947848
ENSSSCG00000000699	10.7495486854607	0.492270524941688	0.430971072013927	1.14223565549611	0.253356078897287	0.994731562947848
ENSSSCG00000000700	23.2108612966805	-0.0352114783963975	0.21198646828012	-0.166102481361541	0.868076301440157	0.994731562947848
ENSSSCG00000000703	0.0684770495784786	-0.157691905206694	3.06038250977364	-0.0515268613328854	0.958905698028026	0.994731562947848
ENSSSCG00000000704	15.8722602656518	-0.523748702835706	0.27686017289086	-1.89174447652379	0.0585250342997898	0.994731562947848
ENSSSCG00000000706	64.6399718816679	-0.117177461655019	0.164905964256845	-0.710571398573023	0.477349872056738	0.994731562947848
ENSSSCG00000000707	1.29895572168735	1.10032107995042	0.940467847370126	1.16997203362912	0.242012223451288	0.994731562947848
ENSSSCG00000000708	1.36421951964134	0.1015686527703	0.970819651204784	0.104621545973296	0.916676117315625	0.994731562947848
ENSSSCG00000000712	2.74748816900917	-0.19156545161917	0.667671074826867	-0.286915906412217	0.774176710761388	0.994731562947848
ENSSSCG00000000719	45.8690872946768	-0.103919181800235	0.203301274047564	-0.511158536940215	0.609240049550799	0.994731562947848
ENSSSCG00000000720	1.37177872659882	1.33394468054454	0.900247370669237	1.48175348688094	0.138405899479239	0.994731562947848
ENSSSCG00000000721	0.0700083978008061	0.563647170019878	3.06038250977364	0.184175399061984	0.853875858043919	0.994731562947848
ENSSSCG00000000722	1.01857156095325	0.107044880891417	0.930929224459746	0.114987131222074	0.908455322179315	0.994731562947848
ENSSSCG00000000723	4.54983509012197	-0.021400000781479	0.408075781685792	-0.0524412419013792	0.958177113023241	0.994731562947848
ENSSSCG00000000728	10.5187476888704	-0.0256645751949019	0.314756662002402	-0.0815378299910488	0.935014241039185	0.994731562947848
ENSSSCG00000000730	0.0684770495784786	-0.157691905206694	3.06038250977364	-0.0515268613328854	0.958905698028026	0.994731562947848
ENSSSCG00000000732	0.233859938628075	0.972240666199567	2.00373366710257	0.485214518357345	0.627524184473445	0.994731562947848
ENSSSCG00000000735	56.8640603740031	-0.0652143561658493	0.160268275733975	-0.406907454810937	0.684075960478649	0.994731562947848
ENSSSCG00000000736	1.14629233838415	-0.0627257450077333	0.814544783067634	-0.0770071165043911	0.938617883629619	0.994731562947848
ENSSSCG00000000737	3.51426952126463	-0.323474923791801	0.564835967002965	-0.572688254092896	0.566855791856289	0.994731562947848
ENSSSCG00000000738	4.99178992958832	-0.835759841266312	0.463285451532418	-1.80398464597119	0.0712337139790306	0.994731562947848
ENSSSCG00000000739	0.135850090890596	-0.518360598299771	3.06038250977364	-0.169377715577819	0.865499550639651	0.994731562947848
ENSSSCG00000000741	0.0684770495784786	-0.157691905206694	3.06038250977364	-0.0515268613328854	0.958905698028026	0.994731562947848
ENSSSCG00000000742	8.55656374696109	-0.0488834486535868	0.387582521898761	-0.126123975906105	0.899633788987274	0.994731562947848
ENSSSCG00000000743	17.9999724569007	0.43118445700989	0.277348480788084	1.55466673473271	0.120025461042731	0.994731562947848
ENSSSCG00000000744	17.4535562998651	0.550637819566779	0.30648964375911	1.79659518936164	0.0723999086777373	0.994731562947848
ENSSSCG00000000745	15.8478200412691	-0.422144428172369	0.291591907582284	-1.44772340107979	0.14769442262735	0.994731562947848
ENSSSCG00000000748	0.122090405107839	-0.518359819690576	2.73304264213287	-0.18966400732264	0.849572426804126	0.994731562947848
ENSSSCG00000000749	14.0405549640556	-0.181254011556422	0.28995200970065	-0.625117279730364	0.531894087658757	0.994731562947848
ENSSSCG00000000751	0.674201560984689	-0.599099909781372	1.29186649905434	-0.463747539099371	0.642828633186538	0.994731562947848
ENSSSCG00000000753	40.5702250771708	-0.212097670862802	0.221789599776728	-0.956301247111304	0.338920060041714	0.994731562947848
ENSSSCG00000000754	4.892280047417	-0.444583649948368	0.449181907481369	-0.989763039302309	0.322289954423143	0.994731562947848
ENSSSCG00000000755	53.0636074888695	-0.0590464051149843	0.158893992809579	-0.371608794460508	0.710184140267748	0.994731562947848
ENSSSCG00000000757	344.211023593276	0.0813438710852112	0.164335254975359	0.494987342170786	0.620609055500626	0.994731562947848
ENSSSCG00000000759	0.605327760023858	0.225649625496106	1.2455727969384	0.181161330795559	0.856240945889852	0.994731562947848
ENSSSCG00000000760	0.154246697627259	-0.518359390673817	2.53467662011916	-0.204507110121783	0.837957236334123	0.994731562947848
ENSSSCG00000000764	0.0504719948606048	-0.157691905206694	3.06038250977364	-0.0515268613328854	0.958905698028026	0.994731562947848
ENSSSCG00000000765	1.10951030837711	0.145773820323301	0.971674297850303	0.150023336673416	0.880746203621112	0.994731562947848
ENSSSCG00000000766	5.12399893655577	0.330198926421325	0.427128684060146	0.773066616089937	0.439482957043249	0.994731562947848
ENSSSCG00000000767	76.9171043801543	-0.172931027016237	0.188896452604999	-0.915480543077495	0.359939412290556	0.994731562947848
ENSSSCG00000000769	6.26945167329401	0.0462090111001697	0.397272752723716	0.11631558112999	0.907402437473004	0.994731562947848
ENSSSCG00000000770	0.33465529204547	0.268871435324468	1.69266131973533	0.158845382823842	0.873790692384134	0.994731562947848
ENSSSCG00000000773	83.648887730345	0.195841387807262	0.197288239628295	0.992666304774382	0.320872600772584	0.994731562947848
ENSSSCG00000000774	10.9183784543286	-0.215240419603992	0.550756598603795	-0.390808607921612	0.695938711795494	0.994731562947848
ENSSSCG00000000778	44.3391566769302	-0.088226451217712	0.176976078217904	-0.498521902542568	0.618116235487481	0.994731562947848
ENSSSCG00000000779	66.8045609682977	0.334949240507709	0.212802347021652	1.57399222891855	0.115489246020806	0.994731562947848
ENSSSCG00000000781	0.30740385492603	0.599620430862873	1.55522848058886	0.385551343964481	0.69982897397459	0.994731562947848
ENSSSCG00000000783	7.66316444973224	-0.562225519519794	0.403250580703977	-1.39423362649171	0.163247066653134	0.994731562947848
ENSSSCG00000000789	0.19043423631172	0.573490220394603	2.08700442501645	0.274791089812894	0.783476743981891	0.994731562947848
ENSSSCG00000000791	2.77686492388487	0.283021647325213	1.19630384286308	0.236580070367294	0.812982582875029	0.994731562947848
ENSSSCG00000000793	31.266180086603	0.0740278502289358	0.19529273889908	0.379060945359524	0.704642606980537	0.994731562947848
ENSSSCG00000000795	0.0504719948606048	-0.157691905206694	3.06038250977364	-0.0515268613328854	0.958905698028026	0.994731562947848
ENSSSCG00000000798	32.1523004859611	-0.0405958118427483	0.256622625178659	-0.158192644995684	0.874304999223735	0.994731562947848
ENSSSCG00000000799	14.2528414143553	0.016844802531474	0.31208371670633	0.0539752689094154	0.956954868062622	0.994731562947848
ENSSSCG00000000800	19.8488032288076	-0.193044502210511	0.209801839322513	-0.920127787410662	0.357505984954385	0.994731562947848
ENSSSCG00000000801	0.266004882691299	1.21303553821267	1.74111329089054	0.69670109610859	0.485989872697502	0.994731562947848
ENSSSCG00000000802	43.0309837918567	0.0947687225336493	0.35063741885915	0.270275553710135	0.786948271045457	0.994731562947848
ENSSSCG00000000804	2.11281269162727	-0.499789385064287	0.651814128253308	-0.766766725973848	0.44322022303223	0.994731562947848
ENSSSCG00000000806	148.182583021764	0.169835351118973	0.13175495090599	1.28902443476416	0.197389591905685	0.994731562947848
ENSSSCG00000000807	4.87750051838065	-0.10708488445515	0.447529092451908	-0.23928027531899	0.81088825923719	0.994731562947848
ENSSSCG00000000808	603.206700989755	0.156250019755503	0.21801942642592	0.716679345125213	0.47357197343186	0.994731562947848
ENSSSCG00000000810	2.01396306786257	0.484653890286315	0.686092237104111	0.706397571749191	0.479940930536099	0.994731562947848
ENSSSCG00000000811	4.32148382618815	-0.223165593969262	0.479601441458238	-0.465314685649656	0.641706119569265	0.994731562947848
ENSSSCG00000000812	1.40438327277443	-0.56530416548659	0.875109232903419	-0.645981260660496	0.518291491477669	0.994731562947848
ENSSSCG00000000816	2.81712410977067	0.373089489936243	0.536074257175124	0.695966062429971	0.48645008353569	0.994731562947848
ENSSSCG00000000837	1.56166498335375	0.328172019969145	0.765719350967052	0.428580026813592	0.668228883374649	0.994731562947848
ENSSSCG00000000838	83.3227056634185	0.0985998119764799	0.170475293726613	0.578381827777355	0.563006360000706	0.994731562947848
ENSSSCG00000000839	3.54700157422577	0.531093213632395	0.506505767270191	1.04854327028637	0.294388377281065	0.994731562947848
ENSSSCG00000000840	33.46366772763	0.0841782900070256	0.221538030999626	0.379972186388023	0.703966061520747	0.994731562947848
ENSSSCG00000000841	11.9280149338878	-0.332108142686433	0.29412174254802	-1.12915196207302	0.258833734384718	0.994731562947848
ENSSSCG00000000842	1.25697900079716	0.640384632846125	0.849767775300801	0.753599573270993	0.451089700652845	0.994731562947848
ENSSSCG00000000843	76.9923308705176	-0.153384979239017	0.212916548656096	-0.720399519000117	0.471279046085342	0.994731562947848
ENSSSCG00000000844	17.73700566522	0.178878254436492	0.226165159479672	0.790918702279471	0.428991433979518	0.994731562947848
ENSSSCG00000000846	18.6795739306128	-0.547483255718339	0.237171262788572	-2.30838782608497	0.020977575490849	0.994731562947848
ENSSSCG00000000847	5.43159365410165	-0.137407753571972	0.407271692017789	-0.337385966825238	0.735825962009239	0.994731562947848
ENSSSCG00000000848	2.52772233486414	0.579193684736796	0.596742213211124	0.970592781797859	0.331751101845131	0.994731562947848
ENSSSCG00000000849	734.93034219424	0.292857834310286	0.173493744220067	1.68800227136036	0.0914107929294877	0.994731562947848
ENSSSCG00000000853	0.309416208898295	-0.163095319602561	1.54718359193529	-0.10541432862441	0.916047046812789	0.994731562947848
ENSSSCG00000000854	25.5110449799188	-0.0141498411314426	0.273852385037483	-0.0516695924686062	0.958791966557426	0.994731562947848
ENSSSCG00000000856	24.9952321129068	-0.623235705913487	0.30418603205877	-2.04886365654382	0.0404754490280735	0.994731562947848
ENSSSCG00000000857	11.8525862547074	-0.826025417443014	0.381524993180722	-2.16506240012365	0.0303829069193759	0.994731562947848
ENSSSCG00000000858	0.0700083978008061	0.563647170019878	3.06038250977364	0.184175399061984	0.853875858043919	0.994731562947848
ENSSSCG00000000859	0.493828925413468	-1.18200519444064	1.34334475069999	-0.87989713275369	0.378915038137459	0.994731562947848
ENSSSCG00000000860	5.20825367399802	0.514127758275724	0.420290943214122	1.22326632675926	0.221229121140952	0.994731562947848
ENSSSCG00000000862	9.41497095647911	-0.0422082142277385	0.312163108802918	-0.135212051128009	0.892444219172737	0.994731562947848
ENSSSCG00000000863	0.151105336958504	-0.518359425633325	2.55141821392152	-0.203165213293907	0.839005901559171	0.994731562947848
ENSSSCG00000000866	4.14612579425151	-0.258910513397326	0.443724134251425	-0.583494323188245	0.559560577478825	0.994731562947848
ENSSSCG00000000867	0.533677032769388	0.48235651608751	1.35151187477101	0.356901426537029	0.721165601683195	0.994731562947848
ENSSSCG00000000869	30.1660917783996	0.336042865777954	0.228663690970362	1.46959433896967	0.141671654405871	0.994731562947848
ENSSSCG00000000870	84.0982990802713	0.0850698649063668	0.167071717175667	0.509181723540437	0.610624852563191	0.994731562947848
ENSSSCG00000000873	0.15770129212106	0.555635106984728	2.20517609474526	0.251968588045534	0.801065343708475	0.994731562947848
ENSSSCG00000000874	2.04195342554948	-0.0853963876994603	0.688785184363263	-0.12398116225221	0.901330190318753	0.994731562947848
ENSSSCG00000000875	84.5774742885754	-0.0724869948148969	0.172779849228393	-0.419533846907566	0.674826023670992	0.994731562947848
ENSSSCG00000000877	28.1778524289078	0.342934521344013	0.189006481931998	1.81440614014178	0.0696152211405882	0.994731562947848
ENSSSCG00000000883	0.188073924059267	0.195101890481388	2.12692844484404	0.0917294095879632	0.926913030420569	0.994731562947848
ENSSSCG00000000884	4.89218596104745	0.293079820307705	0.582898993214142	0.502796923171276	0.615107057099478	0.994731562947848
ENSSSCG00000000886	154.695894728609	0.0959981526482255	0.182228197658722	0.526801855484579	0.598331194264394	0.994731562947848
ENSSSCG00000000887	0.159874947443361	-0.157687958685145	2.53749763652092	-0.0621430957868186	0.950448877821369	0.994731562947848
ENSSSCG00000000890	22.7000375456838	-0.0117928894400437	0.225990891082584	-0.0521830299599739	0.958382854639357	0.994731562947848
ENSSSCG00000000891	6.72585266393666	0.250011197769383	0.382095532283516	0.654315941029831	0.512908277754031	0.994731562947848
ENSSSCG00000000892	105.20919398158	0.0790833307419925	0.363557460078447	0.217526359450658	0.827798166887819	0.994731562947848
ENSSSCG00000000893	9.84736494264158	-0.809619880225531	0.417694835179719	-1.93830474316777	0.0525860540769028	0.994731562947848
ENSSSCG00000000894	8.46325642968147	-0.586242874788944	0.334065903523173	-1.75487192379176	0.0792812175575137	0.994731562947848
ENSSSCG00000000895	16.5826262457169	-0.198133429565855	0.291796266772141	-0.679012900876399	0.497129687780335	0.994731562947848
ENSSSCG00000000896	5.28149501116527	-0.115452534587785	0.480554665154568	-0.240248493999429	0.810137621544811	0.994731562947848
ENSSSCG00000000900	16.9397622788998	0.0145122112968422	0.255454563337858	0.0568093640889423	0.954697054522377	0.994731562947848
ENSSSCG00000000901	9.86906053409616	-0.259864150661396	0.360319023630754	-0.721205747181693	0.470782936310472	0.994731562947848
ENSSSCG00000000902	4.2188326240633	-0.0791113324876315	0.525593322664323	-0.150518146019441	0.880355835373465	0.994731562947848
ENSSSCG00000000905	54.7017818872254	0.279571522176067	0.171186525128402	1.63313976942033	0.10243960403483	0.994731562947848
ENSSSCG00000000906	13.189364049768	0.69582449627263	0.355460039221207	1.95753226662874	0.0502849220068044	0.994731562947848
ENSSSCG00000000907	4.45028665816873	-0.0367693464232351	0.4221476689823	-0.0871006738278987	0.930591489785783	0.994731562947848
ENSSSCG00000000908	0.843396061507117	-0.352454822087922	1.18286656717505	-0.297966678464556	0.765728595808681	0.994731562947848
ENSSSCG00000000910	60.5767188010181	-0.0821356411880041	0.280307636073599	-0.293019634921534	0.769507143578601	0.994731562947848
ENSSSCG00000000915	37.8118405865078	-0.249273307093885	0.330347690212532	-0.754578628757821	0.450501850683032	0.994731562947848
ENSSSCG00000000916	1.24136427595015	0.725867732930375	0.85656321614544	0.847418753512207	0.396761755165074	0.994731562947848
ENSSSCG00000000917	0.173822982402608	-0.157686536239175	2.14348885369033	-0.0735653632943763	0.941356232517916	0.994731562947848
ENSSSCG00000000920	10.2224306289021	0.043032906753396	0.334904990300172	0.128492880069736	0.897758932400566	0.994731562947848
ENSSSCG00000000924	2.98003738549429	-0.222444943403365	0.542004730812889	-0.410411442479009	0.681504153895979	0.994731562947848
ENSSSCG00000000925	19.8493777928108	0.0848333140288083	0.269444174194274	0.314845604966177	0.752878883527045	0.994731562947848
ENSSSCG00000000926	14.6835239001196	-0.0533558831570927	0.34319832242432	-0.155466619942055	0.876453467379217	0.994731562947848
ENSSSCG00000000927	18.4775961645644	0.252782052038786	0.24595591953271	1.02775347923744	0.304065804420873	0.994731562947848
ENSSSCG00000000934	0.332773889310403	-0.414667868105872	1.53623183677797	-0.269925318678189	0.787217708415118	0.994731562947848
ENSSSCG00000000936	0.0684770495784786	-0.157691905206694	3.06038250977364	-0.0515268613328854	0.958905698028026	0.994731562947848
ENSSSCG00000000939	643.627488670576	0.317922613055606	0.127585140986857	2.49184670406373	0.0127080872105602	0.994731562947848
ENSSSCG00000000940	0.160902706060817	-0.15768670264529	2.1932413706499	-0.0718966479273387	0.942684157714336	0.994731562947848
ENSSSCG00000000941	1.75647375695683	0.700273716509949	0.714991340823693	0.979415660759208	0.327374642183613	0.994731562947848
ENSSSCG00000000948	0.806941921366738	1.49505670076464	1.20913230451197	1.23647072796395	0.216283639932838	0.994731562947848
ENSSSCG00000000950	0.165701055263785	0.555690806941288	2.17256675445946	0.25577617157248	0.798123674339956	0.994731562947848
ENSSSCG00000000951	2.38461180572258	-1.02968602615183	0.609916809114561	-1.68824011859365	0.0913651448900749	0.994731562947848
ENSSSCG00000000952	26.1259649567394	0.122618095909143	0.224898057884988	0.545216339626416	0.585604734933518	0.994731562947848
ENSSSCG00000000955	0.537782035247012	-0.623514932202135	1.43186949741585	-0.435455139820646	0.663232094254756	0.994731562947848
ENSSSCG00000000958	28.6862615801665	0.278838393481415	0.204278450384295	1.36499172064824	0.172255652243353	0.994731562947848
ENSSSCG00000000959	20.0728416335627	-0.274591196849106	0.238760538659346	-1.15006943103308	0.250115275680185	0.994731562947848
ENSSSCG00000000964	13.0956749480148	-0.12608039932317	0.350853703967787	-0.359353194500536	0.719330884720554	0.994731562947848
ENSSSCG00000000965	1.21943469547809	-0.197408744122999	0.89301730324227	-0.221058140090084	0.825047163312979	0.994731562947848
ENSSSCG00000000967	0.0404223133994059	-0.157691905206694	3.06038250977364	-0.0515268613328854	0.958905698028026	0.994731562947848
ENSSSCG00000000968	0.662045639438553	-1.01611382026417	1.30871481825767	-0.776421116417827	0.437500380552941	0.994731562947848
ENSSSCG00000000971	2.7351621126608	-0.736151645009065	0.581426917076554	-1.26611208285725	0.205472957314019	0.994731562947848
ENSSSCG00000000972	2.96409178563247	0.485714071670235	0.599842212256502	0.809736396915221	0.418091694572344	0.994731562947848
ENSSSCG00000000973	12.8435879119007	-0.111943447560479	0.357342471894537	-0.313266561813892	0.754078152288647	0.994731562947848
ENSSSCG00000000974	6.7578822294655	-0.324954414887528	0.378281583367662	-0.859027849028791	0.390325151588225	0.994731562947848
ENSSSCG00000000975	1.45109834968486	-0.273165795014756	0.844642862799241	-0.323409818570483	0.746384894611199	0.994731562947848
ENSSSCG00000000978	2.26413306154076	0.195188210519896	0.63371417208739	0.308006699419339	0.758077234602933	0.994731562947848
ENSSSCG00000000980	20.9030584050494	-0.329416507124404	0.239182015623805	-1.37726286094404	0.168430993167594	0.994731562947848
ENSSSCG00000000981	14.7823407939862	-0.470772055541984	0.360633716346597	-1.30540222448179	0.191755921323566	0.994731562947848
ENSSSCG00000000985	40.113026943173	0.0159722474295166	0.179410326884277	0.0890263548754303	0.929060965114757	0.994731562947848
ENSSSCG00000000994	43.0662032741112	-0.0441744996787923	0.18693446230007	-0.236310090366766	0.813192057663483	0.994731562947848
ENSSSCG00000000997	5.2532877981364	0.239091216907905	0.407285320189658	0.587036176006954	0.557179410766464	0.994731562947848
ENSSSCG00000000998	18.4048498770144	0.131601287809033	0.293553998670171	0.448303509423139	0.653934168228109	0.994731562947848
ENSSSCG00000000999	0.363282749235691	0.225553306846564	1.52565826965343	0.147839992305617	0.882469046818305	0.994731562947848
ENSSSCG00000001000	15.1486220664333	-0.375656760073304	0.274674965878058	-1.36764105484618	0.17142445900371	0.994731562947848
ENSSSCG00000001001	0.119180603244114	0.202980810530868	2.75456832356336	0.0736887913777681	0.94125801772554	0.994731562947848
ENSSSCG00000001002	137.595526758669	0.245632393336938	0.193892049221976	1.26685129340052	0.205208467296078	0.994731562947848
ENSSSCG00000001004	8.52561370566841	-0.0993671024437991	0.401781598560925	-0.247316210597264	0.804663514151722	0.994731562947848
ENSSSCG00000001008	0.328972667217714	0.363612806837436	1.57947324439509	0.230211437976395	0.817927474316446	0.994731562947848
ENSSSCG00000001009	107.339346482486	0.132493396879548	0.172656427115068	0.767381782962803	0.442854556386843	0.994731562947848
ENSSSCG00000001010	38.4593275512892	0.374449481292687	0.214406553856066	1.74644606033853	0.0807334721788282	0.994731562947848
ENSSSCG00000001011	150.956858271702	0.0745955126023034	0.197280488675425	0.378119058317173	0.705342151037585	0.994731562947848
ENSSSCG00000001021	0.230563080377106	0.893595697520985	1.77909249909094	0.502276131217227	0.615473296712612	0.994731562947848
ENSSSCG00000001022	175.852704596329	0.067979408926553	0.167520484099204	0.405797591214555	0.684891328701707	0.994731562947848
ENSSSCG00000001024	22.0517306070414	-0.10664630678938	0.225477769817704	-0.472979251460586	0.636227982105223	0.994731562947848
ENSSSCG00000001025	78.2480335626098	-0.0442198294008061	0.166344152938307	-0.265833385903297	0.79036752979237	0.994731562947848
ENSSSCG00000001027	8.66227252963667	0.308411948071049	0.383384157982971	0.80444624966676	0.421139299826128	0.994731562947848
ENSSSCG00000001033	7.35212548033017	0.301286590670321	0.351208869849269	0.857855870210869	0.390972054559187	0.994731562947848
ENSSSCG00000001036	0.0852775700134604	0.563647170019878	3.06038250977364	0.184175399061984	0.853875858043919	0.994731562947848
ENSSSCG00000001038	123.281327757968	-0.281570456981442	0.181972707602305	-1.5473224567104	0.121785509247928	0.994731562947848
ENSSSCG00000001040	4.57795135518313	0.395882364707862	0.448500189054456	0.882680485692714	0.377408928560847	0.994731562947848
ENSSSCG00000001041	70.8213541743554	0.179103627600408	0.210284957945515	0.851718683781527	0.394370248107394	0.994731562947848
ENSSSCG00000001042	0.892248628853872	0.318070183582529	1.02394524197236	0.310632024589371	0.756080378657259	0.994731562947848
ENSSSCG00000001045	5.98888259896003	0.281485621874073	0.497162620891976	0.566184202201384	0.571268567980093	0.994731562947848
ENSSSCG00000001048	59.5411995520912	-0.084462330524968	0.205240484069184	-0.411528607077817	0.680684969202292	0.994731562947848
ENSSSCG00000001049	17.109922138875	0.47486211326728	0.253188573890857	1.87552742199172	0.0607202006101433	0.994731562947848
ENSSSCG00000001052	13.2990517353979	0.154012719571192	0.326059297000818	0.472345738912655	0.636680027915138	0.994731562947848
ENSSSCG00000001053	22.03588434869	0.433852031865505	0.231880541967925	1.87101525718151	0.0613429662946118	0.994731562947848
ENSSSCG00000001056	1.21786968506998	-0.064662317709067	0.866176261975729	-0.0746526088830623	0.940491115030234	0.994731562947848
ENSSSCG00000001062	13.1923965136884	-0.326834005114762	0.314818143732324	-1.03816762668118	0.29919202152437	0.994731562947848
ENSSSCG00000001063	4.89812684200428	0.02847608191077	0.554067931312708	0.0513945678886413	0.959011113251588	0.994731562947848
ENSSSCG00000001064	5.38187270986784	-0.11671787463175	0.538125202860316	-0.216897246238153	0.828288423707983	0.994731562947848
ENSSSCG00000001065	2.23330965208248	-0.101193642544894	0.805134444386356	-0.125685397327673	0.899980961440002	0.994731562947848
ENSSSCG00000001068	0.493476438169233	-0.607754273788914	1.35021585963866	-0.450116379133303	0.6526265271425	0.994731562947848
ENSSSCG00000001070	51.8684609045165	0.0171526877150463	0.18115790241116	0.0946836295118725	0.924566121310545	0.994731562947848
ENSSSCG00000001072	1.64707489578846	0.534123423146221	0.718946656354809	0.74292497005873	0.457527107096397	0.994731562947848
ENSSSCG00000001073	27.774641224322	-0.104197925828076	0.239806076626369	-0.434509113755369	0.663918778116122	0.994731562947848
ENSSSCG00000001074	6.16162532476804	-0.270258456333979	0.447928392477454	-0.603351921585506	0.546274599035948	0.994731562947848
ENSSSCG00000001075	219.517835304873	0.173865893236622	0.109589047695409	1.5865261802426	0.112619998122102	0.994731562947848
ENSSSCG00000001076	13.525697768928	0.106641759305161	0.294124819520302	0.36257313979516	0.716923778138675	0.994731562947848
ENSSSCG00000001078	6.40079752192546	-0.173969779503221	0.408475971335446	-0.425899665369434	0.670180958770673	0.994731562947848
ENSSSCG00000001080	10.909639579073	-0.122427846028004	0.335333909893334	-0.365092352476214	0.71504246933104	0.994731562947848
ENSSSCG00000001081	5.91564382512137	-0.253186941245391	0.44521338891498	-0.568686718659623	0.569568762572379	0.994731562947848
ENSSSCG00000001085	9.27626143066577	-0.700769000255031	0.540469807928121	-1.29659231649112	0.194771497557833	0.994731562947848
ENSSSCG00000001087	13.3844588733998	0.0409892825176433	0.419119338182806	0.0977985952529948	0.922092222863376	0.994731562947848
ENSSSCG00000001089	5.17819518868626	-0.157693172186784	0.456868762766347	-0.345160766150763	0.729973512376562	0.994731562947848
ENSSSCG00000001090	205.440623281736	0.136838993442933	0.191253201228634	0.715486028802981	0.474308770824869	0.994731562947848
ENSSSCG00000001091	0.662567825444259	-1.71034319308007	1.36759302357609	-1.25062292918673	0.211072081027106	0.994731562947848
ENSSSCG00000001092	14.0993266422372	0.0861262345685954	0.319253278850032	0.269774001629136	0.787334125176742	0.994731562947848
ENSSSCG00000001095	19.1929716502403	0.0722810241819474	0.278651786459727	0.259395516893246	0.795330088373909	0.994731562947848
ENSSSCG00000001097	23.5371805465752	-0.0273345767366666	0.252954817979653	-0.10806110338197	0.913947222428035	0.994731562947848
ENSSSCG00000001098	0.217985453663696	0.212664145561861	2.04070739103642	0.104210993940613	0.917001909574966	0.994731562947848
ENSSSCG00000001100	5.75141031525679	-0.365200628899274	0.391167629268669	-0.933616694157581	0.350501650754247	0.994731562947848
ENSSSCG00000001107	42.7947816004736	-0.0187757995023619	0.193195989236107	-0.0971852447693194	0.922579285542152	0.994731562947848
ENSSSCG00000001131	0.0504719948606048	-0.157691905206694	3.06038250977364	-0.0515268613328854	0.958905698028026	0.994731562947848
ENSSSCG00000001137	0.602741010008941	-1.58018195823132	1.30453626379772	-1.21129783976349	0.225781276379364	0.994731562947848
ENSSSCG00000001156	17.6125697264899	0.265511555446615	0.247396424736644	1.07322309014471	0.283171033076983	0.994731562947848
ENSSSCG00000001164	2.15359591273139	-1.10369883557538	0.654561145380165	-1.68616613339364	0.0917638049353814	0.994731562947848
ENSSSCG00000001197	1.33342173331216	-0.805495977921952	0.934289776338901	-0.862147909911163	0.388606129959959	0.994731562947848
ENSSSCG00000001201	3.97105797200384	0.0386548675856115	0.469738395978837	0.0822902021987427	0.934415945509036	0.994731562947848
ENSSSCG00000001203	0.0700083978008061	0.563647170019878	3.06038250977364	0.184175399061984	0.853875858043919	0.994731562947848
ENSSSCG00000001204	0.835297474540211	-1.84143103412803	1.02366556790205	-1.79885999086786	0.0720408308055736	0.994731562947848
ENSSSCG00000001206	2.99572056465518	-0.854770700548646	0.562944459932244	-1.51839259711611	0.128915456786508	0.994731562947848
ENSSSCG00000001209	0.538007299432382	-0.741070291998429	1.1584649585517	-0.639700222719645	0.522367510642742	0.994731562947848
ENSSSCG00000001219	15.8044860989831	-0.113276131702446	0.248324866546105	-0.45616104934628	0.648274172404977	0.994731562947848
ENSSSCG00000001229	3135.33217789586	-0.581229706385386	0.278564443164763	-2.08651793381112	0.0369317324303473	0.994731562947848
ENSSSCG00000001231	16.4728435431369	-0.154851946146689	0.648162125634398	-0.238909279055954	0.811175930239939	0.994731562947848
ENSSSCG00000001232	0.155587447136212	-0.157688043919822	2.55918145360381	-0.0616165937345973	0.950868162162274	0.994731562947848
ENSSSCG00000001233	0.0724844478316902	0.563647170019878	3.06038250977364	0.184175399061984	0.853875858043919	0.994731562947848
ENSSSCG00000001234	1.0157212918843	0.494240780341159	1.18700353148448	0.416376840701607	0.677134272478996	0.994731562947848
ENSSSCG00000001235	2.39711538098587	-0.442828593676045	0.725025138611326	-0.610776882197788	0.541347299962127	0.994731562947848
ENSSSCG00000001242	2.86692599112207	-0.66027066246037	0.627368200713349	-1.05244521751279	0.29259533217303	0.994731562947848
ENSSSCG00000001245	3.65894648252059	-0.102502310774256	0.493463083263638	-0.207720322453166	0.835447348746207	0.994731562947848
ENSSSCG00000001247	0.271775216027834	-0.826479814249661	1.57100902021172	-0.526082157146545	0.598831125313943	0.994731562947848
ENSSSCG00000001252	1.91421435691484	0.0922461636089437	0.719533892540582	0.128202666427893	0.897988589980392	0.994731562947848
ENSSSCG00000001341	204.050587781712	-0.151486247003903	0.199033885172898	-0.761107822782586	0.446592668378058	0.994731562947848
ENSSSCG00000001342	0.0908342549890099	0.202978862886978	3.01194709849946	0.0673912443509055	0.946270239339948	0.994731562947848
ENSSSCG00000001346	84.9236853498488	-0.102142463206657	0.216378451468207	-0.472054691738403	0.63688775133607	0.994731562947848
ENSSSCG00000001347	6.52841656783805	-0.36819367975713	0.409516177780366	-0.89909434531449	0.368602409808906	0.994731562947848
ENSSSCG00000001362	0.343950113283482	1.39632181385888	1.67060535190328	0.835817874202357	0.403257369402459	0.994731562947848
ENSSSCG00000001372	2.44871428627442	-0.598562360758554	0.6062350352858	-0.987343729608718	0.323474159814373	0.994731562947848
ENSSSCG00000001376	12.9925310553326	0.336036569271349	0.26976698974296	1.24565488754399	0.212891122284331	0.994731562947848
ENSSSCG00000001382	7.41394375518693	-0.112717232220562	0.378365628231002	-0.297905580767355	0.765775228408104	0.994731562947848
ENSSSCG00000001383	1.93515065045431	1.0166933136384	0.662040102393039	1.53569747506747	0.124612594632885	0.994731562947848
ENSSSCG00000001391	0.0579386110002768	0.563647170019878	3.06038250977364	0.184175399061984	0.853875858043919	0.994731562947848
ENSSSCG00000001392	1.20083625222819	0.804080324151751	0.901707750879336	0.891730522852466	0.372537389182499	0.994731562947848
ENSSSCG00000001394	2.54080610994656	0.252490068690447	0.586774830791047	0.430301463936443	0.666976362339634	0.994731562947848
ENSSSCG00000001396	10.8839120285818	-0.0240521903737622	0.343257240058251	-0.0700704531962111	0.944137583814308	0.994731562947848
ENSSSCG00000001398	30.6180996367814	-0.265057507979336	0.198514021072998	-1.33520799461248	0.181808281018035	0.994731562947848
ENSSSCG00000001400	19.7370479983616	0.0903483557651616	0.303166742418786	0.298015392599881	0.765691415526952	0.994731562947848
ENSSSCG00000001401	0.558053005365049	1.55915693553365	1.39889832854357	1.11456058222396	0.26503876980136	0.994731562947848
ENSSSCG00000001402	11.7916481070426	-0.196939642787686	0.361010365070124	-0.545523513568458	0.585393513160224	0.994731562947848
ENSSSCG00000001403	0.146133023403164	-0.89034367543321	2.2522734454449	-0.395308872123801	0.692614952520895	0.994731562947848
ENSSSCG00000001404	1.45648832928966	-0.47600406855627	0.775324002023357	-0.613942129115113	0.539253569527556	0.994731562947848
ENSSSCG00000001405	4.95250557869619	-0.21263375646396	0.453817459138765	-0.468544680646458	0.639395126733611	0.994731562947848
ENSSSCG00000001407	0.2152375615955	0.893306091939142	1.81139030489453	0.493160468798663	0.621899207442725	0.994731562947848
ENSSSCG00000001409	0.442118571190741	-0.785872611430656	1.47160357169964	-0.534024669784546	0.593324466104814	0.994731562947848
ENSSSCG00000001410	9.12018019083041	0.36878399603508	0.360848613421109	1.02199089124588	0.306785211570588	0.994731562947848
ENSSSCG00000001411	368.623014158711	-0.188109625653836	0.192743725776432	-0.975957193397975	0.329085677751152	0.994731562947848
ENSSSCG00000001413	23.3216606638635	-0.127507944525841	0.219186439538688	-0.581732815196969	0.56074666433432	0.994731562947848
ENSSSCG00000001418	28.8879684018618	0.0863618166953987	0.226599305241343	0.381121277505321	0.703113259631459	0.994731562947848
ENSSSCG00000001419	3.84625180755502	-0.254180662153721	0.55245665197913	-0.46009159495707	0.645450476804209	0.994731562947848
ENSSSCG00000001420	0.197657337328255	-0.508989295101785	1.85768777504206	-0.27399076526208	0.784091718458831	0.994731562947848
ENSSSCG00000001422	32.9598247891391	-0.278319481144739	0.210588598775583	-1.32162653991223	0.186292541269836	0.994731562947848
ENSSSCG00000001423	3.20282710524816	-0.667312431190572	0.595888201951681	-1.119861794553	0.262772661277005	0.994731562947848
ENSSSCG00000001424	9.57087623805908	0.137606910444923	0.346994268078531	0.396568252285308	0.691685867862944	0.994731562947848
ENSSSCG00000001426	14.2742561679099	0.253389601719769	0.31444203786849	0.805838823070295	0.420335789488453	0.994731562947848
ENSSSCG00000001427	430.038660651005	0.0465822552714917	0.161486171606927	0.288459716444809	0.772994862157607	0.994731562947848
ENSSSCG00000001428	1.58943188382134	0.822652906577479	0.819784323807022	1.00349919202789	0.315620066569425	0.994731562947848
ENSSSCG00000001430	33.6942065094304	-0.0680978934323614	0.248729858995565	-0.273782543468476	0.784251739533455	0.994731562947848
ENSSSCG00000001431	2.34834697458255	0.152437609524931	0.623806118428728	0.244366967590664	0.806946622426294	0.994731562947848
ENSSSCG00000001433	4.88539895375713	-0.451104702059504	0.438922534835125	-1.027754708992	0.30406522580473	0.994731562947848
ENSSSCG00000001434	7.11215624695275	0.150347734234303	0.370416968955886	0.405887815177841	0.684825031376184	0.994731562947848
ENSSSCG00000001435	0.234211015290279	-0.508510637203403	1.99848180562315	-0.254448469719665	0.799149109376086	0.994731562947848
ENSSSCG00000001436	2.06393877314767	-0.261752926647012	0.705927634095545	-0.370792860350874	0.710791819521752	0.994731562947848
ENSSSCG00000001438	29.4455178662141	0.322383969104072	0.199943558980162	1.61237486592934	0.106880390817899	0.994731562947848
ENSSSCG00000001439	0.452674286245358	0.515563881691465	1.4747586437464	0.349592039265322	0.726644886154722	0.994731562947848
ENSSSCG00000001440	0.434006268955402	-0.880237972597655	1.61996373026155	-0.543368938547494	0.586875807567891	0.994731562947848
ENSSSCG00000001453	158.514699037657	-0.457611144829997	0.207207913720028	-2.20846364704152	0.0272119692516687	0.994731562947848
ENSSSCG00000001455	29.6277472589053	-0.817215772888978	0.365629221537256	-2.23509425601451	0.0254111614035387	0.994731562947848
ENSSSCG00000001456	85.4760359370129	-0.122686290771786	0.203454046178602	-0.603017207453742	0.546497242052125	0.994731562947848
ENSSSCG00000001457	83.8043973200038	-0.116197721344744	0.206944633858964	-0.561491830824347	0.574462297766787	0.994731562947848
ENSSSCG00000001459	0.760629622919666	0.840716625647836	1.10789880348228	0.758838824453409	0.44794897773096	0.994731562947848
ENSSSCG00000001469	42.0672653205391	-0.33023685928504	0.187532312413289	-1.76095977826613	0.0782452109495293	0.994731562947848
ENSSSCG00000001470	27.4078399616269	-0.537747851584243	0.285628992308662	-1.88267951106004	0.0597438137379809	0.994731562947848
ENSSSCG00000001471	225.304670877976	0.214233408386999	0.16738833075731	1.27985868201056	0.200594841214702	0.994731562947848
ENSSSCG00000001472	3.21648281796486	-0.943753049623251	0.540402969857975	-1.74638760751311	0.0807436218650864	0.994731562947848
ENSSSCG00000001474	5.48439727319189	-0.653426553591278	0.477543291266741	-1.36830851891561	0.171215525358397	0.994731562947848
ENSSSCG00000001475	45.7785075775315	-0.432755133395087	0.280356673651151	-1.54358777252995	0.122688229074613	0.994731562947848
ENSSSCG00000001476	69.3521754777682	-0.109007160096672	0.161513473110397	-0.674910631276956	0.49973254567738	0.994731562947848
ENSSSCG00000001477	14.138999786977	-0.44237904966481	0.355128477005357	-1.24568734502848	0.212879201404793	0.994731562947848
ENSSSCG00000001478	3.1793980850306	0.452066814936986	0.657398967534025	0.687659758019909	0.491667067190841	0.994731562947848
ENSSSCG00000001479	0.0703561851761459	0.563647170019878	3.06038250977364	0.184175399061984	0.853875858043919	0.994731562947848
ENSSSCG00000001481	0.0488244180679678	-0.157691905206694	3.06038250977364	-0.0515268613328854	0.958905698028026	0.994731562947848
ENSSSCG00000001483	0.829481924834798	1.56299704285796	1.09190155682676	1.43144501725987	0.152302714314788	0.994731562947848
ENSSSCG00000001484	1.20286663056816	-1.02938702973944	0.904893800668927	-1.13757772346157	0.255296852907564	0.994731562947848
ENSSSCG00000001486	4.57221631506141	-0.331648185252612	0.486571551432599	-0.681602087660385	0.495490594522588	0.994731562947848
ENSSSCG00000001487	0.0700083978008061	0.563647170019878	3.06038250977364	0.184175399061984	0.853875858043919	0.994731562947848
ENSSSCG00000001489	14.4305316883323	0.259293728448893	0.347018760504249	0.747203776741397	0.454940564689027	0.994731562947848
ENSSSCG00000001493	2.50174245365774	-0.23422904031858	0.636024472364568	-0.368270484070808	0.712671558668643	0.994731562947848
ENSSSCG00000001497	9.38347631922144	-0.313891828029364	0.327516354429161	-0.958400470035936	0.33786085831206	0.994731562947848
ENSSSCG00000001498	0.28197035332813	-0.931547035651308	1.73488776578678	-0.536949452305837	0.591302530398373	0.994731562947848
ENSSSCG00000001499	150.591855775276	0.216813185434129	0.197284713178274	1.09898624146418	0.271774067193522	0.994731562947848
ENSSSCG00000001500	0.107226711058721	-0.518360598299771	3.06038250977364	-0.169377715577819	0.865499550639651	0.994731562947848
ENSSSCG00000001501	9.28740951019837	0.234713049941465	0.336393949187408	0.697732674765516	0.485344389928175	0.994731562947848
ENSSSCG00000001502	256.074263419085	-0.253984884940497	0.125638710299933	-2.02154960309739	0.0432229029866974	0.994731562947848
ENSSSCG00000001503	4.65603284880337	-0.363759991491255	0.49207043292729	-0.739243748760261	0.45975899975345	0.994731562947848
ENSSSCG00000001504	3.04145528707525	-0.462179646901405	0.597228607142176	-0.773873925954419	0.439005350113357	0.994731562947848
ENSSSCG00000001506	0.784206460187102	-0.943654271736691	1.11753200891098	-0.844409166101893	0.398440802084709	0.994731562947848
ENSSSCG00000001507	100.180930689545	-0.0319249454574411	0.183256321120841	-0.174209245619361	0.861701019690308	0.994731562947848
ENSSSCG00000001509	21.4983758978312	0.178159352340693	0.236867644165389	0.752147271816897	0.451962498703388	0.994731562947848
ENSSSCG00000001511	7.47261156058022	0.0812379188414387	0.397602654717167	0.204319357221664	0.838103944155345	0.994731562947848
ENSSSCG00000001516	6.42987019155822	0.727202797235627	0.42736716448542	1.70158790301831	0.0888326467880154	0.994731562947848
ENSSSCG00000001518	0.116876637195817	0.915635343764289	2.77147085842898	0.330378845940066	0.741113723513652	0.994731562947848
ENSSSCG00000001520	16.0041018547154	0.0388696722599839	0.276975412142719	0.14033618348749	0.888394376899934	0.994731562947848
ENSSSCG00000001527	135.596330084306	-0.0406029988683456	0.135295386675836	-0.300106307139869	0.764096068419592	0.994731562947848
ENSSSCG00000001528	712.479731543751	-0.125481135151351	0.0842147063086714	-1.49001451945253	0.136220418275493	0.994731562947848
ENSSSCG00000001531	24.8969152478959	0.427906767420598	0.258008328064291	1.65849982685044	0.0972166224472395	0.994731562947848
ENSSSCG00000001532	2.65468889314388	-0.252162162848872	0.563705898059764	-0.447329296565454	0.654637317123821	0.994731562947848
ENSSSCG00000001533	43.0019157806858	0.0422876558892772	0.165796307474954	0.255057887194896	0.798678389777718	0.994731562947848
ENSSSCG00000001534	11.4597481402411	-0.109233215891481	0.295634798363397	-0.369487003885148	0.711764758340698	0.994731562947848
ENSSSCG00000001535	0.117301467646446	-0.518359900607868	2.76886411157684	-0.187210307086059	0.85149574382437	0.994731562947848
ENSSSCG00000001536	0.735612860217781	-0.237787446447131	1.22045517494736	-0.194835051158178	0.845522081230902	0.994731562947848
ENSSSCG00000001537	0.222148583368664	1.3329731166763	2.00720832772069	0.664093058138101	0.506630752873919	0.994731562947848
ENSSSCG00000001539	5.30177116514314	-0.0771654647141324	0.421236535125364	-0.183187967518457	0.854650535145238	0.994731562947848
ENSSSCG00000001543	0.118949044439083	-0.518359872135849	2.75631285202059	-0.188062785309676	0.850827433551466	0.994731562947848
ENSSSCG00000001546	4.05202390292794	0.576938149327719	0.493472353921346	1.16913975979225	0.242347327031175	0.994731562947848
ENSSSCG00000001549	150.585608488924	0.491609501977616	0.410719720383348	1.19694642740497	0.231327436463502	0.994731562947848
ENSSSCG00000001550	0.239801450967692	0.211508269141673	1.76965518565306	0.119519480888939	0.904863807141479	0.994731562947848
ENSSSCG00000001551	0.0488244180679678	-0.157691905206694	3.06038250977364	-0.0515268613328854	0.958905698028026	0.994731562947848
ENSSSCG00000001554	22.8403003798561	0.227131077918057	0.226231332946562	1.00397710149066	0.315389650926788	0.994731562947848
ENSSSCG00000001555	0.0372208994596494	0.563647170019878	3.06038250977364	0.184175399061984	0.853875858043919	0.994731562947848
ENSSSCG00000001556	70.7146700130048	0.0562436022534923	0.155770030856219	0.361068184581712	0.718048476198985	0.994731562947848
ENSSSCG00000001560	1.47948443679095	-0.258179997818134	0.84482503342768	-0.305601737167552	0.759907897650997	0.994731562947848
ENSSSCG00000001561	1.06782745618886	-0.615269069308177	0.922332884312418	-0.66707918558802	0.504721554645372	0.994731562947848
ENSSSCG00000001562	44.0322893889572	0.0193610755768593	0.204278379317146	0.0947778988729928	0.924491241978155	0.994731562947848
ENSSSCG00000001563	38.2297316630999	0.151868507166944	0.209191160415677	0.725979562736646	0.467851299452424	0.994731562947848
ENSSSCG00000001564	3.37579608267543	0.534574422541109	0.59497439029196	0.898483079715059	0.368928061907891	0.994731562947848
ENSSSCG00000001565	0.079655737736168	0.563647170019878	3.06038250977364	0.184175399061984	0.853875858043919	0.994731562947848
ENSSSCG00000001571	190.468935817953	-0.124494318564769	0.166314652894633	-0.748546904304583	0.454130344517428	0.994731562947848
ENSSSCG00000001572	10.5919191766628	0.0908791403219616	0.363652418589217	0.249906602228924	0.802659577357805	0.994731562947848
ENSSSCG00000001573	59.8430394289366	0.285186199038057	0.464169741579664	0.614400667453054	0.538950594830828	0.994731562947848
ENSSSCG00000001578	16.4244539274201	0.0179579145624429	0.225454951504288	0.0796518969427085	0.936514118509633	0.994731562947848
ENSSSCG00000001579	0.645044216672607	1.37623445997191	1.21326423653826	1.13432376767212	0.256658762939188	0.994731562947848
ENSSSCG00000001582	0.188142860324206	-0.529317693333579	2.12581195611608	-0.24899553876847	0.803364232308726	0.994731562947848
ENSSSCG00000001588	0.745943288878312	-0.47512436610035	1.17469348386904	-0.404466673753439	0.685869579783627	0.994731562947848
ENSSSCG00000001594	0.0876928943202542	0.202978580668231	3.04743931136787	0.0666062749505985	0.946895150153615	0.994731562947848
ENSSSCG00000001595	0.244509109055588	1.05022989865161	2.0030141561434	0.524324750991138	0.600052684625322	0.994731562947848
ENSSSCG00000001596	3.56066586268671	-0.515327908153826	0.550741604792623	-0.935698163475171	0.349428616467829	0.994731562947848
ENSSSCG00000001611	15.254950616591	-0.0818618317205524	0.347084631650938	-0.235855535669123	0.813544772303625	0.994731562947848
ENSSSCG00000001612	0.396032120590515	0.229167383502479	1.50292804076178	0.152480609375232	0.878807883077489	0.994731562947848
ENSSSCG00000001616	0.458186512816176	0.228232879135613	1.47708689198103	0.154515540266905	0.877203259002677	0.994731562947848
ENSSSCG00000001620	0.339819363901588	0.872350037220716	1.42333299453297	0.612892443701803	0.539947459930342	0.994731562947848
ENSSSCG00000001621	22.2686097786585	0.341598722603324	0.262570142555682	1.30098083231563	0.193265015748776	0.994731562947848
ENSSSCG00000001624	0.308986631723954	0.535711615707047	1.54284786370949	0.347222579949672	0.72842410854132	0.994731562947848
ENSSSCG00000001625	7.54845562327118	-0.143660221853568	0.360518312155685	-0.398482454315747	0.690274589185246	0.994731562947848
ENSSSCG00000001629	0.63972681707543	2.48031273673596	1.23812361607973	2.00328360151094	0.0451468566128748	0.994731562947848
ENSSSCG00000001633	0.0488244180679678	-0.157691905206694	3.06038250977364	-0.0515268613328854	0.958905698028026	0.994731562947848
ENSSSCG00000001636	0.154246697627259	-0.518359390673817	2.53467662011916	-0.204507110121783	0.837957236334123	0.994731562947848
ENSSSCG00000001638	16.8091584110806	0.149421831537769	0.256770560184984	0.581927427467238	0.560615565077385	0.994731562947848
ENSSSCG00000001639	1.23125685332925	0.401826045062154	0.883597504349374	0.454761407862999	0.649280897152972	0.994731562947848
ENSSSCG00000001641	28.9056501154468	0.230886134732019	0.182668424837668	1.26396302446468	0.206243298738537	0.994731562947848
ENSSSCG00000001646	14.6353640275767	0.153855087917576	0.286923832924833	0.536222754133785	0.591804609424976	0.994731562947848
ENSSSCG00000001650	0.0679250454452981	-0.157691905206694	3.06038250977364	-0.0515268613328854	0.958905698028026	0.994731562947848
ENSSSCG00000001651	15.4433243599022	-0.62916198338811	0.346347091805292	-1.81656493810495	0.0692837561917329	0.994731562947848
ENSSSCG00000001653	3.3609233555375	0.142628870030713	0.535703055349372	0.266246138801083	0.790049651313878	0.994731562947848
ENSSSCG00000001654	1.08604262561208	-1.52643621893664	1.10851791556875	-1.37700635912003	0.168510281783297	0.994731562947848
ENSSSCG00000001656	26.9421827105919	-0.215589565469923	0.208609907636081	-1.03345794029121	0.301389643763455	0.994731562947848
ENSSSCG00000001657	0.414931981369215	-0.53433532376163	1.31376517503799	-0.406720572225686	0.684213229184114	0.994731562947848
ENSSSCG00000001658	1.9840925821572	-0.760006473277302	0.791891203612182	-0.959735971065927	0.337188114548597	0.994731562947848
ENSSSCG00000001659	4.3309563211624	-0.276540615677914	0.462271848941202	-0.598220757572213	0.549692642736393	0.994731562947848
ENSSSCG00000001660	1.21828175304633	0.0783315189655258	0.874551133570186	0.0895676833048657	0.928630766141777	0.994731562947848
ENSSSCG00000001661	0.71451721175713	1.02110886260107	1.1500564916009	0.887877134782894	0.374606845389856	0.994731562947848
ENSSSCG00000001664	0.0908342549890099	0.202978862886978	3.01194709849946	0.0673912443509055	0.946270239339948	0.994731562947848
ENSSSCG00000001667	37.5156519171991	0.0559003457476508	0.230877555918687	0.242121177717848	0.808686268881569	0.994731562947848
ENSSSCG00000001679	23.2862789975809	-0.204324589090447	0.212237835073775	-0.962715196465429	0.335690468399755	0.994731562947848
ENSSSCG00000001680	2.71904284920114	0.149052937481822	0.630288615714275	0.236483626335069	0.813057411302	0.994731562947848
ENSSSCG00000001683	15.0906574832336	-0.026676368731247	0.342951316929772	-0.077784709999261	0.937999309247895	0.994731562947848
ENSSSCG00000001688	3.30437456197723	-0.0580916650692309	0.503608230291437	-0.115350904880195	0.908166991346348	0.994731562947848
ENSSSCG00000001689	1.16092540711062	-1.22845309438639	1.12976011253603	-1.08735746708991	0.27687886054334	0.994731562947848
ENSSSCG00000001692	0.565631982947977	0.674052017342293	1.18387192258613	0.569362280228633	0.569110309244663	0.994731562947848
ENSSSCG00000001695	60.6387161183678	0.296733077487019	0.242494929960195	1.22366714032218	0.221077820385258	0.994731562947848
ENSSSCG00000001696	37.0197542168219	-0.421674219765369	0.196467355557646	-2.14628134311934	0.0318505391741723	0.994731562947848
ENSSSCG00000001697	58.5667447329844	0.257575367619339	0.250199147047404	1.02948139775447	0.303253516767016	0.994731562947848
ENSSSCG00000001700	15.08011287577	-0.0452303504084329	0.258317231080495	-0.175096141357827	0.861004090185127	0.994731562947848
ENSSSCG00000001701	864.263972314135	0.0735818131817753	0.172676846320908	0.426124374804879	0.670017219771012	0.994731562947848
ENSSSCG00000001703	8.32777533882298	0.0395526567292477	0.374143522768673	0.105715198372424	0.91580832136819	0.994731562947848
ENSSSCG00000001706	1.87671874393951	0.95096184545621	0.689601887245365	1.37900122236448	0.167894377017514	0.994731562947848
ENSSSCG00000001708	66.2951852587006	0.0967746860127482	0.141682380969714	0.683039664850317	0.494581778952116	0.994731562947848
ENSSSCG00000001709	40.2698344729014	0.351323408198713	0.184364767286604	1.90558865107108	0.0567035957090378	0.994731562947848
ENSSSCG00000001710	0.306346789137831	-0.86282007756624	1.68462789074612	-0.512172499521007	0.608530287981777	0.994731562947848
ENSSSCG00000001715	0.0404223133994059	-0.157691905206694	3.06038250977364	-0.0515268613328854	0.958905698028026	0.994731562947848
ENSSSCG00000001716	0.677752131458505	0.344753827364223	1.15759580777359	0.297818828514325	0.765841443213911	0.994731562947848
ENSSSCG00000001718	25.1163492966392	-0.171865098241749	0.216677295008669	-0.793184621558401	0.42767026598549	0.994731562947848
ENSSSCG00000001720	74.4981783136386	0.332951713600016	0.169767468555491	1.96122211418371	0.0498531182605235	0.994731562947848
ENSSSCG00000001723	29.5567000431046	-0.0489812922871712	0.288054286146565	-0.170041879752655	0.864977200937033	0.994731562947848
ENSSSCG00000001724	0.0700083978008061	0.563647170019878	3.06038250977364	0.184175399061984	0.853875858043919	0.994731562947848
ENSSSCG00000001725	73.7862041904484	-0.179093746108127	0.216481232696332	-0.827294559798401	0.408070126505628	0.994731562947848
ENSSSCG00000001726	0.134529504794845	-0.157687109725775	2.31043946602324	-0.0682498338712974	0.945586757727143	0.994731562947848
ENSSSCG00000001731	10.1125258759442	-0.535441707633042	0.317667363601794	-1.68554207634699	0.091884033956221	0.994731562947848
ENSSSCG00000001732	111.688757458603	-0.134083641826339	0.192322536345422	-0.697181122785928	0.485689451083649	0.994731562947848
ENSSSCG00000001734	0.301284257353945	1.2484569567266	1.69019902879596	0.738644937937251	0.460122629073106	0.994731562947848
ENSSSCG00000001736	0.0643693610981611	0.563647170019878	3.06038250977364	0.184175399061984	0.853875858043919	0.994731562947848
ENSSSCG00000001739	0.100633342097899	-0.157691905206694	3.06038250977364	-0.0515268613328854	0.958905698028026	0.994731562947848
ENSSSCG00000001746	0.972752103554363	-0.799613605297056	1.0118847873782	-0.790221985023476	0.429398138763413	0.994731562947848
ENSSSCG00000001749	0.180599727457378	-0.157687595749128	2.44301256858038	-0.0645463710572555	0.948535185299858	0.994731562947848
ENSSSCG00000001750	1.73422095764821	0.264955665650767	0.696508730675261	0.380405376101882	0.70364452450992	0.994731562947848
ENSSSCG00000001755	3.8483198195182	-0.127559306488537	0.469433878235378	-0.271730082558245	0.785829568766059	0.994731562947848
ENSSSCG00000001756	59.2012869150981	0.151708603391923	0.17735743696604	0.855383377134461	0.392338943038747	0.994731562947848
ENSSSCG00000001757	1.17755964307364	0.969948410474555	0.90492465672034	1.07185543378813	0.283784970060481	0.994731562947848
ENSSSCG00000001760	1.11331724254574	0.0886228479051591	1.0093973177021	0.0877977842331795	0.930037398891529	0.994731562947848
ENSSSCG00000001764	1.32613354217795	0.696476156183027	0.876054611271938	0.795014542725616	0.426605042725979	0.994731562947848
ENSSSCG00000001765	0.420796439766992	1.26532846919418	1.63294895481206	0.774873253364989	0.438414558198328	0.994731562947848
ENSSSCG00000001769	667.160896751154	0.131730329463153	0.172553176772343	0.763418743874825	0.445213704941686	0.994731562947848
ENSSSCG00000001770	111.158080586142	-0.07562603085177	0.174579516979582	-0.433189598414429	0.664877034856975	0.994731562947848
ENSSSCG00000001771	0.110778498575552	0.202980323815535	2.82108891420421	0.071951055067257	0.942640859234755	0.994731562947848
ENSSSCG00000001773	3.62108265374899	0.0658254189121127	0.531007774784124	0.1239631923259	0.901344418487256	0.994731562947848
ENSSSCG00000001775	0.652915758902218	-1.23365661456118	1.33969935651135	-0.920845866324582	0.357130904662093	0.994731562947848
ENSSSCG00000001776	0.100633342097899	-0.157691905206694	3.06038250977364	-0.0515268613328854	0.958905698028026	0.994731562947848
ENSSSCG00000001779	169.090501695173	0.188777990784889	0.139219164382384	1.35597704254556	0.175106472611785	0.994731562947848
ENSSSCG00000001780	178.967763774103	-0.239379830121869	0.130784698283506	-1.83033514825227	0.0671998386411814	0.994731562947848
ENSSSCG00000001782	0.104085350389965	-0.518360156846722	2.87936049415203	-0.18002614049179	0.857132046314458	0.994731562947848
ENSSSCG00000001786	0.339439826291384	-1.77248995081325	1.83097072390743	-0.968060235846164	0.333014287455688	0.994731562947848
ENSSSCG00000001787	0.788166719675733	0.278854490345372	1.19142350853308	0.23405152605114	0.814944977355484	0.994731562947848
ENSSSCG00000001788	0.36469399533245	1.60315564823893	1.63199829936615	0.982326788490881	0.325938881219707	0.994731562947848
ENSSSCG00000001792	27.0405628862941	-0.0176939794574675	0.246899471069001	-0.0716647118799318	0.94286873976581	0.994731562947848
ENSSSCG00000001793	3.72792355968164	-0.36695563182834	0.547342407359371	-0.670431574265734	0.502582712478092	0.994731562947848
ENSSSCG00000001800	3.56578040428718	0.233743067393137	0.554871919668396	0.421255895473728	0.673568232390537	0.994731562947848
ENSSSCG00000001801	44.0984269362864	0.037028024035217	0.204062895496895	0.181453977436974	0.856011254117397	0.994731562947848
ENSSSCG00000001804	51.8913278789776	-0.554989244168747	0.248210033975513	-2.23596619072821	0.0253539858949205	0.994731562947848
ENSSSCG00000001805	52.1572885884788	0.202667931815088	0.168256825571193	1.20451536588235	0.228390446635503	0.994731562947848
ENSSSCG00000001806	0.388182020771071	0.630044979910899	1.51651888787775	0.415454752952399	0.67780903177903	0.994731562947848
ENSSSCG00000001808	0.0404223133994059	-0.157691905206694	3.06038250977364	-0.0515268613328854	0.958905698028026	0.994731562947848
ENSSSCG00000001810	19.0492851409544	-0.0191713827399404	0.3659929065186	-0.0523818423758606	0.958224441937354	0.994731562947848
ENSSSCG00000001814	30.5910071628435	-0.455148688554795	0.209914687915774	-2.16825555693091	0.0301392478592773	0.994731562947848
ENSSSCG00000001816	1.2277169787943	-1.00416533552689	0.857890891261039	-1.17050471773962	0.241797916720765	0.994731562947848
ENSSSCG00000001817	127.546738052987	0.159974505889347	0.243001750646475	0.658326557169878	0.510328316566487	0.994731562947848
ENSSSCG00000001818	4.2757622496407	-0.192687953539031	0.462372156635204	-0.416737796110536	0.676870205422482	0.994731562947848
ENSSSCG00000001819	23.2174425446515	-0.118574434991861	0.226654816257654	-0.523149858227892	0.600869971676177	0.994731562947848
ENSSSCG00000001820	10.3397935665631	-0.249737263754659	0.354739616629988	-0.704001617093555	0.481431766553597	0.994731562947848
ENSSSCG00000001821	9.77957688609079	-0.105253996670844	0.341420199109815	-0.308282863595278	0.757867104354199	0.994731562947848
ENSSSCG00000001822	5.19832269022244	-0.0438461816992244	0.473407745483066	-0.0926182178419655	0.926206870213662	0.994731562947848
ENSSSCG00000001823	103.186430332192	0.0144893794246186	0.17816317213377	0.0813264562540434	0.935182334624644	0.994731562947848
ENSSSCG00000001824	0.66643809601157	-1.5954678062933	1.24382340248252	-1.28271248403024	0.199592824544242	0.994731562947848
ENSSSCG00000001825	0.943280319394964	1.25365465144493	0.97161742585905	1.29027600584306	0.1969548446897	0.994731562947848
ENSSSCG00000001826	0.717436978015814	-1.25804388329475	1.31269585085553	-0.9583666181887	0.337877922000243	0.994731562947848
ENSSSCG00000001832	0.0703561851761459	0.563647170019878	3.06038250977364	0.184175399061984	0.853875858043919	0.994731562947848
ENSSSCG00000001834	12.7270258864269	-0.437213885097016	0.355500875483534	-1.22985318813165	0.218752086578426	0.994731562947848
ENSSSCG00000001835	7.77746687095505	-0.312372366544121	0.338128962840777	-0.923826116283377	0.355576855437553	0.994731562947848
ENSSSCG00000001836	0.299612545970541	0.604934750103984	1.71149632908044	0.353453723402963	0.723748316010538	0.994731562947848
ENSSSCG00000001837	3.06160835628748	0.590873745177042	0.55273394292942	1.06900209899447	0.28506872359835	0.994731562947848
ENSSSCG00000001838	3.6997205878202	0.106222394091663	0.490064502858459	0.216751863218182	0.828401727652195	0.994731562947848
ENSSSCG00000001840	0.0684770495784786	-0.157691905206694	3.06038250977364	-0.0515268613328854	0.958905698028026	0.994731562947848
ENSSSCG00000001844	0.297462878640996	0.210992785326525	1.67851802738055	0.12570182856826	0.899967954362379	0.994731562947848
ENSSSCG00000001846	0.153754619591939	0.202982319531598	2.5372677409142	0.0800003548141362	0.936236973775782	0.994731562947848
ENSSSCG00000001847	2.94801500242301	0.937316542359114	0.58743043632172	1.59562134408332	0.110573359207146	0.994731562947848
ENSSSCG00000001848	0.44538062128923	-0.651444937946273	1.21879130133812	-0.534500810131354	0.592995089115164	0.994731562947848
ENSSSCG00000001849	146.941314658	-0.0304860842719086	0.21422244915465	-0.142310408606618	0.886834825325244	0.994731562947848
ENSSSCG00000001850	9.08406662547358	-0.119011428498448	0.341203468793025	-0.348798999375474	0.727240214677215	0.994731562947848
ENSSSCG00000001852	0.781744367695045	-0.256432945104622	1.12276813463943	-0.228393501020559	0.819340341386708	0.994731562947848
ENSSSCG00000001855	0.178419003661688	0.573613837395085	2.12631661626107	0.269768779027712	0.787338143304172	0.994731562947848
ENSSSCG00000001858	0.146120262437534	-0.157686911104222	2.25401792014769	-0.0699581443850679	0.944226973916762	0.994731562947848
ENSSSCG00000001860	1.1899005312786	-1.5769212442597	1.0943811127246	-1.44092512738433	0.14960583639416	0.994731562947848
ENSSSCG00000001862	221.085212010631	0.237574670352582	0.251120311797831	0.946059156472558	0.344118414398065	0.994731562947848
ENSSSCG00000001863	0.30099816588653	-0.904749940916643	1.69854177834031	-0.532662753694935	0.594267053565241	0.994731562947848
ENSSSCG00000001865	52.5871965668946	0.24699473923412	0.168650039513764	1.46454006145645	0.143046445387168	0.994731562947848
ENSSSCG00000001866	34.0836358656168	-0.181348482758977	0.208789537249211	-0.868570739454819	0.385081964727473	0.994731562947848
ENSSSCG00000001867	3.66876324303112	0.378340843017974	0.546255466329865	0.692607884658689	0.48855566087511	0.994731562947848
ENSSSCG00000001868	453.959822789571	0.168651373482929	0.161606730158481	1.04359127443232	0.296674531607949	0.994731562947848
ENSSSCG00000001871	19.9745807985748	0.237306884418888	0.228007032755093	1.04078756497737	0.297974152535877	0.994731562947848
ENSSSCG00000001872	1.85847239783661	-0.230116809069238	0.728472550851075	-0.315889471470671	0.752086403616948	0.994731562947848
ENSSSCG00000001873	1.62339259869162	0.256045521659261	0.742272698399413	0.344948052395541	0.730133424552272	0.994731562947848
ENSSSCG00000001875	19.4169096986085	-0.269545038184417	0.224960490355508	-1.19818834746693	0.230843700731372	0.994731562947848
ENSSSCG00000001877	37.1311805262254	-0.149551107521409	0.230500847384018	-0.648809361087747	0.51646160602877	0.994731562947848
ENSSSCG00000001878	7.89618432929386	-0.817477552299862	0.330961596044743	-2.47000728202116	0.0135110301751484	0.994731562947848
ENSSSCG00000001880	17.1025230952449	-0.169331690606048	0.264077707085502	-0.641219179289612	0.521380290371186	0.994731562947848
ENSSSCG00000001881	0.0579386110002768	0.563647170019878	3.06038250977364	0.184175399061984	0.853875858043919	0.994731562947848
ENSSSCG00000001882	21.268249060462	0.203108441101721	0.360260047049177	0.563782863976577	0.572901915272981	0.994731562947848
ENSSSCG00000001884	15.2917638222884	-0.409271576512445	0.296551602285432	-1.38010239485578	0.167555120032197	0.994731562947848
ENSSSCG00000001885	7.83855619999751	0.66071325014946	0.359775428458493	1.83646018567854	0.0662896253283737	0.994731562947848
ENSSSCG00000001887	9.93011003308018	-0.382156437065837	0.355509148315546	-1.07495528280088	0.282394749263296	0.994731562947848
ENSSSCG00000001888	0.365635324693428	-1.21139910028651	1.49062042822097	-0.812681134212211	0.416400900467309	0.994731562947848
ENSSSCG00000001892	50.4193667321514	0.0639552294140517	0.168434161822712	0.37970462002458	0.704164690301983	0.994731562947848
ENSSSCG00000001898	19.7518601337256	-0.15569953267301	0.27928246409981	-0.557498420729222	0.577186937794104	0.994731562947848
ENSSSCG00000001900	12.8987756034556	-0.374479033594175	0.279512597762736	-1.33975726529525	0.180324273270399	0.994731562947848
ENSSSCG00000001901	142.528181272978	0.0374021178747325	0.1766627524865	0.211714791874935	0.832329547437322	0.994731562947848
ENSSSCG00000001903	0.269424716224099	1.71249514361977	1.90865780624439	0.897224813173503	0.369598967259999	0.994731562947848
ENSSSCG00000001904	1.07297383645819	-1.45586441007385	0.957433820059738	-1.52059012285885	0.128362726995515	0.994731562947848
ENSSSCG00000001906	62.115678215449	0.228084924237659	0.304885921371579	0.748099234007205	0.454400304019086	0.994731562947848
ENSSSCG00000001907	13.398500492948	-0.239994641954263	0.31392810412105	-0.764489189734096	0.444575776365613	0.994731562947848
ENSSSCG00000001910	6.09335493059902	-0.313876289263978	0.380038982342039	-0.825905509297165	0.408857695133502	0.994731562947848
ENSSSCG00000001912	21.8988143014433	0.219844091486446	0.330535658107721	0.665114598361424	0.505977198137108	0.994731562947848
ENSSSCG00000001913	1.9125271211182	-0.505793175231492	0.691924568823257	-0.73099467488441	0.464782405569276	0.994731562947848
ENSSSCG00000001914	3.70388608728554	0.595670636751027	0.496523735143189	1.19968209894185	0.23026282789863	0.994731562947848
ENSSSCG00000001917	8.1037736634017	0.431329450052953	0.352399129748517	1.22397989563925	0.22095981175046	0.994731562947848
ENSSSCG00000001918	17.872167684166	0.149816851301289	0.255598133649662	0.586142195805845	0.557779962517382	0.994731562947848
ENSSSCG00000001921	25.6243952691888	0.317689340117707	0.218226473054757	1.45577819075137	0.145453946591009	0.994731562947848
ENSSSCG00000001924	12.4063543489762	-0.144198002250653	0.281409308594325	-0.512413761189849	0.608361461976976	0.994731562947848
ENSSSCG00000001925	9.22360646922054	0.522354962903703	0.303979822185781	1.7183869611729	0.0857260570264167	0.994731562947848
ENSSSCG00000001927	39.9972492771651	-0.0843077858048952	0.198800222293353	-0.424082955402782	0.671505315537149	0.994731562947848
ENSSSCG00000001929	4.27843097034646	-0.153534928246933	0.453801822045241	-0.338330347716467	0.735114256568875	0.994731562947848
ENSSSCG00000001930	11.6887501929612	-0.155648891540079	0.288481721175093	-0.539545073795537	0.589510804448887	0.994731562947848
ENSSSCG00000001942	3.06642439146336	-0.415958965661	0.542445650285422	-0.766821460255294	0.44318767515056	0.994731562947848
ENSSSCG00000001946	48.6342451820971	-0.0981147518409387	0.177486135702061	-0.552802343984997	0.58039876328101	0.994731562947848
ENSSSCG00000001947	5.6071352274967	0.646112057705124	0.420327386385347	1.53716383617408	0.124253193774541	0.994731562947848
ENSSSCG00000001950	3.21722157502734	-0.599602955285276	0.551523279587765	-1.08717614917986	0.276958969365813	0.994731562947848
ENSSSCG00000001951	43.5723411524855	-0.0831066795629614	0.188011439271846	-0.442029909907755	0.658467562326483	0.994731562947848
ENSSSCG00000001952	453.796410681491	-0.121245280788274	0.185276086072876	-0.654403292719512	0.512852013592314	0.994731562947848
ENSSSCG00000001955	31.7009641895821	0.0678714256164387	0.190390448125606	0.356485455466032	0.721477042477151	0.994731562947848
ENSSSCG00000001956	0.120480392661411	0.202980880570515	2.7448631461352	0.0739493627783646	0.941050677523841	0.994731562947848
ENSSSCG00000001958	49.3402120288434	0.588631670720505	0.223862256754399	2.62943686557353	0.00855264110558975	0.994731562947848
ENSSSCG00000001959	16.1659282773039	0.10353639906265	0.237164892177309	0.436558708635694	0.662431413610117	0.994731562947848
ENSSSCG00000001960	25.9655524065704	0.0923496104553443	0.200833407565722	0.459831915290903	0.645636873104767	0.994731562947848
ENSSSCG00000001963	7.11691953326147	0.133316572292031	0.519314725250151	0.256716333679568	0.797397761569517	0.994731562947848
ENSSSCG00000001966	82.6505822433113	0.0436072743382883	0.134954206511592	0.32312645500637	0.746599475817788	0.994731562947848
ENSSSCG00000001968	25.2941405643005	-0.220851691046723	0.307632635088032	-0.71790722393131	0.472814493381729	0.994731562947848
ENSSSCG00000001970	6.08828116272872	0.0703508862422661	0.382420214491749	0.183962258207938	0.85404306314557	0.994731562947848
ENSSSCG00000001971	192.816689323437	0.0810986494367659	0.149371900966222	0.5429310928774	0.587177247018503	0.994731562947848
ENSSSCG00000001972	0.193332081857339	-1.20589934920047	1.85612599441568	-0.649686148908281	0.515894972743993	0.994731562947848
ENSSSCG00000001973	30.0112699679207	0.115504070796281	0.209778481939117	0.550600184197171	0.581907782573908	0.994731562947848
ENSSSCG00000001974	11.4182631832727	-0.250164781366728	0.334256608967138	-0.748421346520997	0.454206050749552	0.994731562947848
ENSSSCG00000001975	2.69103206550168	-0.586597839523227	0.578662767479938	-1.01371277450223	0.310719826697623	0.994731562947848
ENSSSCG00000001977	4.52859679373203	-0.94617376889428	0.543736690806621	-1.74013228257717	0.0818357928496951	0.994731562947848
ENSSSCG00000001978	1.5478806320696	0.0960579838268729	0.817187280881158	0.117547086297397	0.906426533171172	0.994731562947848
ENSSSCG00000001983	0.0809161492654849	0.202978476926801	3.06038250977364	0.066324544817051	0.947119442306996	0.994731562947848
ENSSSCG00000001984	49.7388246711175	-0.0356349224086147	0.2466790119958	-0.144458671697702	0.885138289288445	0.994731562947848
ENSSSCG00000001985	0.236954688331391	0.892002136971792	1.98553233490696	0.449250874080371	0.653250691765946	0.994731562947848
ENSSSCG00000001986	1.49415348920321	0.345441365321157	0.76424638173551	0.452002617973411	0.651267096443692	0.994731562947848
ENSSSCG00000001987	14.6485188675333	-0.0516204996758496	0.256679182674224	-0.201109023092714	0.84061332672794	0.994731562947848
ENSSSCG00000001988	1.54845944872117	1.53351108956625	0.768982987107547	1.99420678386449	0.0461294611003741	0.994731562947848
ENSSSCG00000001989	115.058703464381	0.025453493506141	0.171008578678771	0.148843372085758	0.881677225831508	0.994731562947848
ENSSSCG00000001990	30.6617540370125	-0.162019366516555	0.189846186484313	-0.853424393278203	0.393423998934812	0.994731562947848
ENSSSCG00000001991	30.7199940994191	-0.247346182315695	0.222205902697258	-1.11313956701091	0.265648492649837	0.994731562947848
ENSSSCG00000001993	0.170555140026921	0.935777913035074	2.88582574811421	0.324266949813783	0.745735939193831	0.994731562947848
ENSSSCG00000001994	14.0358748641919	0.304758767445873	0.321993034076484	0.946476274929233	0.343905717614122	0.994731562947848
ENSSSCG00000002001	1.31581229698182	-0.34837598637751	0.888414238020218	-0.392132376394425	0.694960406421991	0.994731562947848
ENSSSCG00000002002	0.164933307749628	0.935155663201491	2.48361152707698	0.376530569699077	0.706522493429545	0.994731562947848
ENSSSCG00000002003	4.78735354346692	-0.286793082181851	0.452707494006087	-0.633506372169741	0.526403020976822	0.994731562947848
ENSSSCG00000002004	54.0143848234986	-0.0319104019346478	0.203043182912782	-0.157160666400482	0.875118226680431	0.994731562947848
ENSSSCG00000002005	0.409095964916051	-0.346512991568203	1.49808706927852	-0.231303639604261	0.817078919353135	0.994731562947848
ENSSSCG00000002006	3.83905350361314	0.517590624870114	0.56696174642761	0.912919836534686	0.361284703931089	0.994731562947848
ENSSSCG00000002007	0.241221011396417	-0.803913166520182	1.78034640806101	-0.451548733931914	0.651594109389599	0.994731562947848
ENSSSCG00000002008	95.5230799147656	-0.0804526888428974	0.165345766752492	-0.486572413815274	0.626561376794757	0.994731562947848
ENSSSCG00000002009	118.533386171843	0.0943975338789117	0.175584389904414	0.537619169507612	0.590839993212751	0.994731562947848
ENSSSCG00000002014	0.0436952498058356	-0.157691905206694	3.06038250977364	-0.0515268613328854	0.958905698028026	0.994731562947848
ENSSSCG00000002016	6.57177110865906	0.363322444479381	0.368634370998916	0.985590257074671	0.324334220959228	0.994731562947848
ENSSSCG00000002020	40.4051218231763	0.103569361480581	0.248242190231092	0.417210955898216	0.676524112267291	0.994731562947848
ENSSSCG00000002023	107.514298712243	0.300343170049356	0.187994233770347	1.59761905472194	0.110127783131221	0.994731562947848
ENSSSCG00000002025	2.9589227131565	-0.328678626229564	0.54731097309112	-0.600533594956524	0.548150678502099	0.994731562947848
ENSSSCG00000002026	0.323718505839765	0.169554883498761	1.44295224463076	0.117505540553872	0.906459453735034	0.994731562947848
ENSSSCG00000002028	0.0643693610981611	0.563647170019878	3.06038250977364	0.184175399061984	0.853875858043919	0.994731562947848
ENSSSCG00000002029	1.39431485161425	0.31205427091192	1.04173065962756	0.299553697520516	0.764517607057302	0.994731562947848
ENSSSCG00000002032	6.6751144552503	-0.789335616892286	0.538479432363683	-1.46586029001601	0.142686352108632	0.994731562947848
ENSSSCG00000002033	0.113703647606642	0.202980500305038	2.79715048399039	0.0725668860030253	0.942150778362372	0.994731562947848
ENSSSCG00000002034	100.218259703786	-0.0490191445652674	0.126273699548727	-0.388197579863823	0.697869824006307	0.994731562947848
ENSSSCG00000002035	11.278781450155	0.0193080190362868	0.286283789778453	0.0674436336448835	0.946228533617483	0.994731562947848
ENSSSCG00000002036	92.9798325374789	-0.179539943906702	0.13829641121186	-1.29822561795663	0.19420981750121	0.994731562947848
ENSSSCG00000002039	124.263823904945	-0.127466539967394	0.204029317457202	-0.624746196066316	0.53213764839756	0.994731562947848
ENSSSCG00000002040	50.1854040806705	-0.0436938085472332	0.168741444010021	-0.258939401660202	0.795681996534777	0.994731562947848
ENSSSCG00000002042	7.47587168331782	0.955987239773489	0.366892461239886	2.60563336881549	0.00917045638453527	0.994731562947848
ENSSSCG00000002045	120.691459185363	0.201742404818892	0.273030951566528	0.738899394597519	0.459968089991898	0.994731562947848
ENSSSCG00000002050	39.4754921110455	-0.299239386723337	0.275488180879329	-1.08621497215669	0.277383894769507	0.994731562947848
ENSSSCG00000002051	6.6092563767109	0.0874571422146176	0.367207689431372	0.238168057836824	0.81175075049939	0.994731562947848
ENSSSCG00000002090	0.0404223133994059	-0.157691905206694	3.06038250977364	-0.0515268613328854	0.958905698028026	0.994731562947848
ENSSSCG00000002097	0.18802384170957	-0.885453020416962	2.41040242914655	-0.367346551642198	0.713360534369721	0.994731562947848
ENSSSCG00000002100	0.0436952498058356	-0.157691905206694	3.06038250977364	-0.0515268613328854	0.958905698028026	0.994731562947848
ENSSSCG00000002127	48.1194444367525	-0.011784700751746	0.167761422509616	-0.070246786033723	0.943997236402528	0.994731562947848
ENSSSCG00000002129	0.0841175632052415	-0.518360598299771	3.06038250977364	-0.169377715577819	0.865499550639651	0.994731562947848
ENSSSCG00000002134	0.0703561851761459	0.563647170019878	3.06038250977364	0.184175399061984	0.853875858043919	0.994731562947848
ENSSSCG00000002135	1.82315673187306	0.676687072995849	0.751818209173913	0.900067416216725	0.368084374860184	0.994731562947848
ENSSSCG00000002138	9.08594623318385	0.10919299599641	0.338340401011653	0.322731177447085	0.746898838352987	0.994731562947848
ENSSSCG00000002140	0.177119214244391	0.573627556775128	2.13081519668103	0.269205681313243	0.787771408553242	0.994731562947848
ENSSSCG00000002142	5.88978665551004	0.235892816868116	0.418086724537305	0.564219820969387	0.572604540067262	0.994731562947848
ENSSSCG00000002143	27.3452593397556	0.0426829163068971	0.294710072735742	0.144830191620799	0.884844944072339	0.994731562947848
ENSSSCG00000002144	17.0359169421065	0.0511395598235216	0.273275663452801	0.187135433786456	0.851554446725685	0.994731562947848
ENSSSCG00000002145	13.2170105919672	-0.133878770177003	0.335054781832964	-0.399572778650108	0.689471209390624	0.994731562947848
ENSSSCG00000002235	0.423362702474234	-0.242841525594443	1.52301635491407	-0.159447746447965	0.873316123818774	0.994731562947848
ENSSSCG00000002243	1.64883398034522	-0.184580580965773	0.773140692276614	-0.238741257328277	0.811306222905585	0.994731562947848
ENSSSCG00000002245	8.64856526550381	0.475807929490661	0.332280729478948	1.43194560285449	0.152159389780385	0.994731562947848
ENSSSCG00000002252	37.6518401588391	0.291937789764578	0.409182564048125	0.713465859533161	0.475557531914541	0.994731562947848
ENSSSCG00000002254	101.614307825748	-0.0404992430403159	0.145515900850054	-0.278314897572933	0.780770641109766	0.994731562947848
ENSSSCG00000002257	0.140364582976952	0.935384986857853	2.61164647223309	0.358159114107834	0.720224242570762	0.994731562947848
ENSSSCG00000002259	40.1699665674511	-0.467232326703129	0.251606219763063	-1.85699831722412	0.0633113934947334	0.994731562947848
ENSSSCG00000002260	0.100633342097899	-0.157691905206694	3.06038250977364	-0.0515268613328854	0.958905698028026	0.994731562947848
ENSSSCG00000002262	0.0925196678738034	-0.518360432335184	2.99361152659243	-0.173155543974412	0.862529166491735	0.994731562947848
ENSSSCG00000002263	2.76474092967847	-0.478218546780344	0.557192211588391	-0.858264952083739	0.390746177667207	0.994731562947848
ENSSSCG00000002265	0.328038174142748	1.37415935274358	1.68148288670539	0.817230650165008	0.413796629836286	0.994731562947848
ENSSSCG00000002266	121.263107359202	0.220719090341572	0.14782502028484	1.49311050264884	0.135408263784865	0.994731562947848
ENSSSCG00000002267	2.25461834868442	-0.281564082415887	0.625576588198906	-0.450087307817155	0.652647488168346	0.994731562947848
ENSSSCG00000002268	18.8394138546223	-0.314093541669321	0.286431246515511	-1.09657568959507	0.272826919417812	0.994731562947848
ENSSSCG00000002269	151.774360243188	0.0481901565647576	0.171989917221023	0.280191753931882	0.779330392809017	0.994731562947848
ENSSSCG00000002275	0.150011922912314	0.935290787404618	2.55671546230189	0.36581731569087	0.714501398105422	0.994731562947848
ENSSSCG00000002276	10.9393797565809	-0.539913171881954	0.323609087506338	-1.66841165074321	0.0952340370274415	0.994731562947848
ENSSSCG00000002279	0.280221085922145	0.42825137133639	1.95624051504734	0.218915500441942	0.826715871713187	0.994731562947848
ENSSSCG00000002280	0.151262191665296	-0.899327575043902	2.58029687438787	-0.348536474221498	0.727437326451816	0.994731562947848
ENSSSCG00000002281	8.04374347358675	-0.450941992791686	0.348047400430076	-1.29563384824729	0.195101661901977	0.994731562947848
ENSSSCG00000002283	15.842601590267	-0.58967194792719	0.253731869648834	-2.32399638540992	0.0201256877696215	0.994731562947848
ENSSSCG00000002284	0.079655737736168	0.563647170019878	3.06038250977364	0.184175399061984	0.853875858043919	0.994731562947848
ENSSSCG00000002285	46.1582049532334	0.0591155446661777	0.258614570826815	0.228585514254591	0.819191084451947	0.994731562947848
ENSSSCG00000002287	66.0917888645157	-0.0284340860233731	0.182093585013208	-0.156150948542809	0.875914039738732	0.994731562947848
ENSSSCG00000002290	9.20459439627098	0.16545652237315	0.370860488374565	0.446142222101699	0.655494515446112	0.994731562947848
ENSSSCG00000002292	0.445605264213165	-0.579871309183108	1.35881819244092	-0.426746795420404	0.669563762486245	0.994731562947848
ENSSSCG00000002294	0.211339208097452	0.893226767718223	1.82058352023476	0.490626635795893	0.623690543940916	0.994731562947848
ENSSSCG00000002295	103.54311385485	0.036424727784829	0.180266435535732	0.202060509359819	0.839869420004003	0.994731562947848
ENSSSCG00000002296	167.922473136384	0.11264910412622	0.244495870122028	0.460740314631886	0.644984927551484	0.994731562947848
ENSSSCG00000002298	0.0488244180679678	-0.157691905206694	3.06038250977364	-0.0515268613328854	0.958905698028026	0.994731562947848
ENSSSCG00000002307	198.836529723462	-0.212645231234054	0.184997939290214	-1.14944648599825	0.250371921052895	0.994731562947848
ENSSSCG00000002309	0.285793743480782	-0.1652190261321	1.94512760121091	-0.0849399422584133	0.932309137181742	0.994731562947848
ENSSSCG00000002311	31.5560070851267	-0.262099259217336	0.650344681523115	-0.403015918579508	0.686936513967747	0.994731562947848
ENSSSCG00000002313	14.5270802912609	-0.122032509259159	0.302487008712834	-0.403430579641885	0.686631494495984	0.994731562947848
ENSSSCG00000002316	10.0146700439618	0.0453943717671995	0.380010272406791	0.119455643869032	0.904914379405281	0.994731562947848
ENSSSCG00000002330	12.4799421941022	0.195910639340209	0.27988067919075	0.699979147923565	0.483940326826957	0.994731562947848
ENSSSCG00000002332	11.3140093309796	-0.157047886002448	0.293365487072853	-0.535331840051955	0.592420412951146	0.994731562947848
ENSSSCG00000002333	9.98189320659416	0.256312872020107	0.320310790880917	0.800200553079079	0.423594609422767	0.994731562947848
ENSSSCG00000002337	8.72563935851528	-0.258346458200912	0.31123184657275	-0.830077195010066	0.40649513984759	0.994731562947848
ENSSSCG00000002340	46.9887468927924	-0.337237516780105	0.169890235490574	-1.98503178129279	0.0471409356881794	0.994731562947848
ENSSSCG00000002344	10.7218238738189	0.245037664800463	0.312689341950623	0.783645720931405	0.433248020129167	0.994731562947848
ENSSSCG00000002346	0.0724844478316902	0.563647170019878	3.06038250977364	0.184175399061984	0.853875858043919	0.994731562947848
ENSSSCG00000002348	5.6854848305551	0.320179868292823	0.442101069652477	0.724223238239408	0.468928694179859	0.994731562947848
ENSSSCG00000002349	129.741807931746	0.145154885821332	0.140947178652632	1.02985307835831	0.303078979858258	0.994731562947848
ENSSSCG00000002350	2.0569754593044	0.261038742498769	0.653403182191459	0.39950638382762	0.689520120853692	0.994731562947848
ENSSSCG00000002351	95.3728831032651	-0.110183341487356	0.275663790453666	-0.39970190247339	0.689376090702626	0.994731562947848
ENSSSCG00000002352	2.99854318292611	0.920605669152595	0.575590290156702	1.59941139539022	0.109729221926695	0.994731562947848
ENSSSCG00000002353	2.95031567480669	-0.989058798203568	0.578347445778486	-1.71014639283527	0.0872388057268384	0.994731562947848
ENSSSCG00000002354	9.48159962464484	-0.223898267712137	0.320321333108194	-0.698980194480247	0.484564408281005	0.994731562947848
ENSSSCG00000002355	48.5750670389169	0.299210854638197	0.231460952534103	1.29270553569554	0.19611292245898	0.994731562947848
ENSSSCG00000002356	0.400525085142872	0.236699638461736	1.62714817386898	0.145469012756791	0.88434057971908	0.994731562947848
ENSSSCG00000002357	351.323514992792	0.0559624014885828	0.161455976165185	0.346610901731676	0.72888365469396	0.994731562947848
ENSSSCG00000002366	106.573477882276	0.224361644742543	0.267649190790246	0.8382675997641	0.401880428497	0.994731562947848
ENSSSCG00000002367	1.72605619565605	0.55776033475255	0.761899175319117	0.732065807157405	0.464128402564838	0.994731562947848
ENSSSCG00000002368	8.91871853606033	-0.0224798203152123	0.400355179681763	-0.0561496927130585	0.955222557289715	0.994731562947848
ENSSSCG00000002370	75.1504565705627	-0.154141808204282	0.164739949492498	-0.935667448479464	0.349444435416201	0.994731562947848
ENSSSCG00000002372	63.170266846904	0.028846723404815	0.153936118522662	0.187394119597528	0.851351632820165	0.994731562947848
ENSSSCG00000002374	0.213210555808944	0.195827054651595	1.82282390288862	0.10743059400377	0.914447384443342	0.994731562947848
ENSSSCG00000002375	0.551758630379409	-1.26273446832518	1.32947280015259	-0.949800904674586	0.342213426125045	0.994731562947848
ENSSSCG00000002377	8.58139236030402	-0.459495022631802	0.337090109828775	-1.36312223121943	0.172843991468895	0.994731562947848
ENSSSCG00000002378	4.85197797188447	0.796400789676287	0.42274061911477	1.8838993786402	0.0595785873090515	0.994731562947848
ENSSSCG00000002379	2.12582427307145	-1.29465375312377	0.700760895189161	-1.84749714490603	0.0646751215338455	0.994731562947848
ENSSSCG00000002381	48.5066891320481	0.201798004423376	0.165628035298705	1.21838071712582	0.223079329342168	0.994731562947848
ENSSSCG00000002383	26.4790022624403	0.177079270001419	0.367772681579105	0.481491091837201	0.630167509460378	0.994731562947848
ENSSSCG00000002385	2.63490612918105	-0.180959757012108	0.617917869376994	-0.292854060353616	0.76963370456561	0.994731562947848
ENSSSCG00000002386	4.38076571384418	-0.0850168347754364	0.453484912728185	-0.187474450393446	0.851288654162628	0.994731562947848
ENSSSCG00000002387	21.386557641149	0.028067813537394	0.241240093287216	0.116348046275944	0.907376708719405	0.994731562947848
ENSSSCG00000002388	0.208334538722286	-0.15768720749053	2.33771101091526	-0.067453678728575	0.946220537010564	0.994731562947848
ENSSSCG00000002389	3.24299118323272	-0.39762447460723	0.495810950367164	-0.801967916022783	0.422571517643623	0.994731562947848
ENSSSCG00000002390	0.10094398972121	-0.518360598299771	3.06038250977364	-0.169377715577819	0.865499550639651	0.994731562947848
ENSSSCG00000002392	0.241345712450191	0.573920251495362	2.23400960904396	0.256901424761987	0.797254870685935	0.994731562947848
ENSSSCG00000002396	227.417144602025	-0.284190798899268	0.162971805590376	-1.7438034626282	0.0811933664967723	0.994731562947848
ENSSSCG00000002398	0.0404223133994059	-0.157691905206694	3.06038250977364	-0.0515268613328854	0.958905698028026	0.994731562947848
ENSSSCG00000002403	6.74242788610636	-0.81840927325682	0.39297577723043	-2.0825947060267	0.0372881821801737	0.994731562947848
ENSSSCG00000002404	21.6039295212889	0.420469173161429	0.249407025302713	1.68587541850954	0.0918197974846172	0.994731562947848
ENSSSCG00000002406	96.5066860735443	-0.153379062729481	0.193070060405943	-0.794421788686399	0.42694992381903	0.994731562947848
ENSSSCG00000002408	0.234531827643392	0.21155936305264	1.77949036074367	0.118887613959441	0.905364394790069	0.994731562947848
ENSSSCG00000002409	0.0504719948606048	-0.157691905206694	3.06038250977364	-0.0515268613328854	0.958905698028026	0.994731562947848
ENSSSCG00000002410	34.1909976793378	-0.340848850840601	0.281287510769471	-1.2117454127565	0.225609849646262	0.994731562947848
ENSSSCG00000002411	49.707303387137	0.106340553142585	0.224418645808391	0.473849010003292	0.63560758250351	0.994731562947848
ENSSSCG00000002412	2.17310172236616	0.15130205407966	0.633055330062299	0.23900289105025	0.81110334096657	0.994731562947848
ENSSSCG00000002414	104.567833319878	0.0160949405179796	0.149811517396493	0.107434600474558	0.914444206136812	0.994731562947848
ENSSSCG00000002424	1.77307436137832	-0.192136034323459	0.740312247066554	-0.259533777922475	0.795223423584292	0.994731562947848
ENSSSCG00000002425	0.927828636263528	-0.316076464218357	0.989440180200685	-0.319449796504371	0.749385455092657	0.994731562947848
ENSSSCG00000002426	30.3448460646595	0.170607393799415	0.197477733563014	0.863932306297078	0.38762507843873	0.994731562947848
ENSSSCG00000002427	0.175921327627798	0.573640247230788	2.13500143560708	0.268683775881245	0.788173037807512	0.994731562947848
ENSSSCG00000002428	0.88699669470824	1.56563660124689	0.993090990437726	1.57652885417559	0.11490397443117	0.994731562947848
ENSSSCG00000002429	400.02693625121	0.119675337955392	0.130113370944459	0.91977739940715	0.357689096110963	0.994731562947848
ENSSSCG00000002430	0.441636183032655	-0.46956457749234	1.3704881241259	-0.342625790932577	0.731879996893118	0.994731562947848
ENSSSCG00000002431	1.73848542518056	-0.506262761301455	0.758440082302463	-0.667505282374514	0.504449436671645	0.994731562947848
ENSSSCG00000002433	73.068679008858	-0.445680869118376	0.270867360201765	-1.64538417912884	0.0998906100661857	0.994731562947848
ENSSSCG00000002434	10.990718668408	-0.328141063460869	0.333557510755845	-0.983761578977186	0.325232754418946	0.994731562947848
ENSSSCG00000002440	1.06915785189815	0.43703463964472	0.904612595521422	0.483118012957592	0.629011944846718	0.994731562947848
ENSSSCG00000002441	50.2754765634636	0.118572316105949	0.145015972188661	0.81765004444952	0.413557043035826	0.994731562947848
ENSSSCG00000002442	0.223211471163409	-0.149461437152352	2.05861019735567	-0.072603078205062	0.94212197713395	0.994731562947848
ENSSSCG00000002443	1.42128375347492	0.594906197540212	0.742887174550522	0.800802891637153	0.423245764730882	0.994731562947848
ENSSSCG00000002444	30.0999084467117	-0.226840822037453	0.221346203044162	-1.0248236424105	0.305446408707773	0.994731562947848
ENSSSCG00000002445	88.3959204118935	-0.0627108797979203	0.157584660056698	-0.397950408214591	0.690666741615252	0.994731562947848
ENSSSCG00000002446	21.6729666053457	0.0267891670582561	0.204926994110772	0.130725418456952	0.895992523871265	0.994731562947848
ENSSSCG00000002447	36.5225851927446	-0.0999629522738281	0.18737085061348	-0.533503220733293	0.593685282142572	0.994731562947848
ENSSSCG00000002449	60.4805879800934	-0.0737702065969513	0.155741270536935	-0.473671534479079	0.635734155217377	0.994731562947848
ENSSSCG00000002450	1.97571458444924	0.269834320520182	0.764184287023621	0.353101110690387	0.724012640242051	0.994731562947848
ENSSSCG00000002451	7.3039958520708	0.123456656979149	0.359889565750174	0.343040389964653	0.731568074866315	0.994731562947848
ENSSSCG00000002452	442.761906597486	-0.188823493036726	0.407937993560394	-0.462873024865165	0.643455383968652	0.994731562947848
ENSSSCG00000002455	23.3484375906801	-0.134102748663899	0.25907801778271	-0.517615310675922	0.604726697222102	0.994731562947848
ENSSSCG00000002457	6.14339836238973	-0.437330635256122	0.409807499105698	-1.06716113348459	0.285899079946998	0.994731562947848
ENSSSCG00000002458	10.4800841987872	0.437231307030727	0.374783005643534	1.16662522165317	0.243361753230064	0.994731562947848
ENSSSCG00000002459	20.3609900314929	0.0313335364850354	0.269853537326096	0.11611312119719	0.907562889943096	0.994731562947848
ENSSSCG00000002460	14.8140846546238	0.278002971139565	0.271215205317469	1.0250272318403	0.305350338626496	0.994731562947848
ENSSSCG00000002461	38.8102083823265	0.155766678715151	0.19972190591042	0.779917846292814	0.435439233219266	0.994731562947848
ENSSSCG00000002462	1.54260788312126	3.81772483805832	2.27658629550704	1.67695151534242	0.0935519632488724	0.994731562947848
ENSSSCG00000002464	4.6506633538552	0.208479111694027	0.634636626129517	0.328501544207253	0.742532476905204	0.994731562947848
ENSSSCG00000002467	1.23063896141765	-1.30124970890807	1.02857245395035	-1.26510262248466	0.205834542937563	0.994731562947848
ENSSSCG00000002469	1.18539076640759	-0.932479893820546	0.889293011859024	-1.04856316353059	0.294379217182761	0.994731562947848
ENSSSCG00000002470	102.538370617028	0.0665425696264805	0.194302485181817	0.34246895794572	0.731998001156685	0.994731562947848
ENSSSCG00000002472	1.60429118429774	-0.140499382056603	0.751312642062787	-0.187005214860821	0.85165654420852	0.994731562947848
ENSSSCG00000002475	352.590937847412	-0.55837729716257	0.194827622375655	-2.86600683390746	0.0041568527209636	0.994731562947848
ENSSSCG00000002476	1248.18733874374	-0.16857201188278	0.169745722039822	-0.993085480193916	0.320668299266649	0.994731562947848
ENSSSCG00000002481	2857.35074930089	-0.12286422697664	0.102154633032632	-1.20272789720063	0.229081634696742	0.994731562947848
ENSSSCG00000002483	1412.55421655324	-0.30309539286626	0.161460545314258	-1.87721026382223	0.0604892813476124	0.994731562947848
ENSSSCG00000002486	98.4266520865027	0.428952208743825	0.753185085550586	0.56951766169169	0.56900488835065	0.994731562947848
ENSSSCG00000002487	1719.56448748688	-0.198760557579488	0.229035871240542	-0.867814096119217	0.385496111979436	0.994731562947848
ENSSSCG00000002490	0.423170345528739	-2.08255186163248	1.41959442882498	-1.4670048144358	0.142374745671894	0.994731562947848
ENSSSCG00000002494	38.3270427904416	-0.181778614472294	0.335189931091157	-0.542315259532237	0.587601345231948	0.994731562947848
ENSSSCG00000002495	23.1490220658161	0.510441625332627	0.28068570489393	1.8185522683655	0.0689797655771903	0.994731562947848
ENSSSCG00000002496	218.460966373772	0.185288190691273	0.20748042412471	0.893039386597271	0.371836080701626	0.994731562947848
ENSSSCG00000002502	11.7728506782017	0.0665775365328587	0.29922016930863	0.222503505317475	0.823921944811786	0.994731562947848
ENSSSCG00000002504	2.0974280138413	0.716256696069689	0.648506939698589	1.10447036450001	0.269389152190986	0.994731562947848
ENSSSCG00000002505	123.088547844603	0.324277403591564	0.129551526840231	2.50307666378551	0.0123118871856709	0.994731562947848
ENSSSCG00000002506	4.44794218993004	-0.112816936460996	0.435576162880102	-0.259006222275874	0.795630439594193	0.994731562947848
ENSSSCG00000002508	29.5748241221979	-0.474488950836198	0.234049024948591	-2.02730582167741	0.0426311465148913	0.994731562947848
ENSSSCG00000002509	1.62486460462024	-0.401927273363984	0.833438256078283	-0.482252008991332	0.629626934658835	0.994731562947848
ENSSSCG00000002515	88.9116358948479	-0.737177371651571	0.309523260854348	-2.3816541917296	0.0172350736837669	0.994731562947848
ENSSSCG00000002516	9.86989398969716	0.0402377618711977	0.324878202068455	0.123854914287907	0.901430151182844	0.994731562947848
ENSSSCG00000002517	5.0226761941393	0.0913559346781618	0.437496903184394	0.208815043062505	0.834592627537435	0.994731562947848
ENSSSCG00000002520	12.5781021442547	-0.126409595964761	0.363991097869741	-0.347287603198468	0.728375263128162	0.994731562947848
ENSSSCG00000002523	66.328897854899	0.247362566610074	0.175830619494724	1.40682303981472	0.159479868841247	0.994731562947848
ENSSSCG00000002525	4.27708299308932	0.918471631821	0.452564896359556	2.02948049928134	0.0424093732437629	0.994731562947848
ENSSSCG00000002528	0.552877937060134	-1.84052660241713	1.53211451345337	-1.20129832741327	0.229635499020698	0.994731562947848
ENSSSCG00000002529	323.24978696897	0.0803596480902857	0.191985552588581	0.418571330013014	0.675529446164911	0.994731562947848
ENSSSCG00000002530	10.9214265444176	-0.655997060890621	0.328598077097369	-1.99635088155503	0.04589574327949	0.994731562947848
ENSSSCG00000002531	0.248429193880949	0.966951149264949	1.75980402861517	0.549465243596392	0.582686210347951	0.994731562947848
ENSSSCG00000002532	8.32378434954088	0.0679163260766309	0.381483675838411	0.178032063698052	0.858697794776997	0.994731562947848
ENSSSCG00000002533	5.8938445404475	0.0857480409953675	0.594776879054552	0.144168416787941	0.885367480119622	0.994731562947848
ENSSSCG00000002535	1253.82350264997	0.0673833685837033	0.153740138678209	0.438293923519493	0.661173230237353	0.994731562947848
ENSSSCG00000002540	52.2842698591994	0.237379687963322	0.190391943996533	1.24679481169458	0.212472743379004	0.994731562947848
ENSSSCG00000002541	0.0504719948606048	-0.157691905206694	3.06038250977364	-0.0515268613328854	0.958905698028026	0.994731562947848
ENSSSCG00000002544	0.903475694565072	0.906870394076309	1.19368866353176	0.759721040989996	0.447421348850996	0.994731562947848
ENSSSCG00000002546	0.540843849903567	-0.343735638096381	1.1933995355801	-0.288030645101009	0.773323280820547	0.994731562947848
ENSSSCG00000002547	19.3873632627827	-0.21397397743729	0.241316282672014	-0.886695149900488	0.375243050297842	0.994731562947848
ENSSSCG00000002550	117.388545258295	-0.19684118623342	0.183410426276227	-1.0732278978348	0.283168876507183	0.994731562947848
ENSSSCG00000002554	0.872406474293572	-2.0715706874568	1.19828353061345	-1.72878174032507	0.083848165369827	0.994731562947848
ENSSSCG00000002555	0.42935886281516	1.27826588559967	1.44973598971817	0.881723220410749	0.377926500815961	0.994731562947848
ENSSSCG00000002557	3.75342845634772	-0.861531634503144	0.529614120462204	-1.62671575627793	0.103797480779189	0.994731562947848
ENSSSCG00000002622	3.81643444292018	-0.0555686519650998	0.475067933137283	-0.11696990701547	0.906883900471312	0.994731562947848
ENSSSCG00000002623	2148.98366685444	0.425882686127418	0.207709650118597	2.05037505905117	0.0403278451025291	0.994731562947848
ENSSSCG00000002625	0.228535576958379	-0.535732082302257	2.0132300553406	-0.266105744289428	0.790157771152704	0.994731562947848
ENSSSCG00000002628	3.22226822421235	-0.816460104068311	0.537773231764553	-1.51822377136423	0.128957996833174	0.994731562947848
ENSSSCG00000002629	39.2500541167105	0.0162991402139866	0.181733651747915	0.0896869680283284	0.928535972210848	0.994731562947848
ENSSSCG00000002632	0.471980803104338	-1.68531834565416	1.40477997286866	-1.19970271373717	0.230254818731715	0.994731562947848
ENSSSCG00000002633	2.92342602302957	0.11765673475916	0.524406409340181	0.224361740557667	0.822475838439873	0.994731562947848
ENSSSCG00000002635	1.77078558880064	-0.306259878630063	0.753649174219663	-0.4063692883989	0.684471281869993	0.994731562947848
ENSSSCG00000002640	58.4537892699685	-0.144256799244247	0.165199261816086	-0.873229078982483	0.38253822797294	0.994731562947848
ENSSSCG00000002642	0.131316621659417	-0.847866899831501	2.69896797265556	-0.314144854041106	0.753411024006914	0.994731562947848
ENSSSCG00000002645	6.6258880466622	0.353325654177678	0.362641782885336	0.974310382456388	0.329902451088622	0.994731562947848
ENSSSCG00000002646	84.0419949508679	-0.339568133497391	0.166014538276057	-2.04541202851006	0.0408142540721319	0.994731562947848
ENSSSCG00000002651	1.89355407124115	0.542588407893268	0.809958529879718	0.6698965291147	0.502923752504703	0.994731562947848
ENSSSCG00000002652	10.8911547535166	-0.202444527596208	0.324540550154986	-0.623788082874481	0.532766767014184	0.994731562947848
ENSSSCG00000002654	28.8020413533237	-0.0713645970852138	0.239230952360309	-0.298308376826301	0.765467811408003	0.994731562947848
ENSSSCG00000002655	155.729713703094	-0.011382801619427	0.123474009912562	-0.0921878347312742	0.92654880336266	0.994731562947848
ENSSSCG00000002656	9.44037523054945	0.566363477476813	0.343954215501951	1.64662461441354	0.0996352278901078	0.994731562947848
ENSSSCG00000002660	5.82515851352521	-0.181806171164681	0.437230571608504	-0.415813035433098	0.677546819446926	0.994731562947848
ENSSSCG00000002664	23.578069724814	0.445757917843513	0.248024546509217	1.79723307276342	0.0722986261416182	0.994731562947848
ENSSSCG00000002666	15.5329413425016	0.104957796772079	0.283799533372573	0.369830758792298	0.711508595401551	0.994731562947848
ENSSSCG00000002667	9.98194691255398	0.286395979343328	0.310310189220434	0.922934500033068	0.356041340255538	0.994731562947848
ENSSSCG00000002669	7.67605028141282	-0.559803780577354	0.466423084700691	-1.20020599095473	0.230059349189152	0.994731562947848
ENSSSCG00000002670	48.0011744210391	0.102863753507801	0.185731661431498	0.553829932468134	0.57969524117423	0.994731562947848
ENSSSCG00000002672	6.05946992267108	0.499245445628522	0.441703408120335	1.13027302133134	0.258361198926221	0.994731562947848
ENSSSCG00000002675	0.138281230621444	0.20298172433234	2.62512735244581	0.0773226198505089	0.938366896735656	0.994731562947848
ENSSSCG00000002680	9.62485874466106	-0.49958692770966	0.316988478716423	-1.57604127989961	0.115016290169305	0.994731562947848
ENSSSCG00000002681	6.1028743373016	0.19950283767396	0.406869922607966	0.4903356738566	0.623896387246917	0.994731562947848
ENSSSCG00000002682	77.2548350746817	-0.060784428087645	0.158679546888145	-0.383064038684789	0.701672282621142	0.994731562947848
ENSSSCG00000002684	3.63436732298353	-0.305720740532147	0.553978654676685	-0.551863754950221	0.581041702661572	0.994731562947848
ENSSSCG00000002688	27.1592332565887	-0.231520341033892	0.239503550217773	-0.966667679136185	0.333710189441414	0.994731562947848
ENSSSCG00000002689	28.9648860883667	-0.146587490571851	0.315715806107892	-0.464302032828082	0.642431367761891	0.994731562947848
ENSSSCG00000002690	5.87172547917778	0.181059409748325	0.42099762960352	0.430072278361378	0.667143064761903	0.994731562947848
ENSSSCG00000002696	0.492777253954686	0.641401917330143	1.48344774905222	0.432372436265409	0.665470748110265	0.994731562947848
ENSSSCG00000002697	31.0478538173987	0.176870602395708	0.249675054872031	0.708403178228445	0.478694919326497	0.994731562947848
ENSSSCG00000002701	92.4128258139169	0.0532359054886131	0.15646190263559	0.340248358174469	0.733669503662044	0.994731562947848
ENSSSCG00000002703	86.7230316528047	0.185985802081795	0.17560515588815	1.05911356156454	0.289548064448433	0.994731562947848
ENSSSCG00000002704	86.7229807986505	-0.266529135503393	0.133314117632304	-1.99925664466018	0.0455805925334082	0.994731562947848
ENSSSCG00000002706	3.30446385701897	-0.132976095400367	0.518203598162633	-0.256609749279729	0.797480048134221	0.994731562947848
ENSSSCG00000002707	105.496555537193	0.372413301793081	0.154748064230656	2.40657809611103	0.0161027607125813	0.994731562947848
ENSSSCG00000002708	2.17140693821399	0.410994744258135	0.821609768165102	0.500231083152782	0.616912374121715	0.994731562947848
ENSSSCG00000002709	0.21612866023834	0.195846099110685	1.81657525929355	0.107810616768417	0.91414592101736	0.994731562947848
ENSSSCG00000002712	29.9815709248691	-0.184566636154769	0.209670699289674	-0.880269092343597	0.37871355197172	0.994731562947848
ENSSSCG00000002714	5.68902471136347	0.829777893555445	0.412216746522809	2.012965025208	0.0441183088911848	0.994731562947848
ENSSSCG00000002715	8.31527189476945	0.289153381885736	0.401033185529437	0.721021083340025	0.470896543122323	0.994731562947848
ENSSSCG00000002716	0.743211857903992	-0.651209025604979	1.20034649022271	-0.542517540484628	0.58746202732039	0.994731562947848
ENSSSCG00000002720	0.0404223133994059	-0.157691905206694	3.06038250977364	-0.0515268613328854	0.958905698028026	0.994731562947848
ENSSSCG00000002722	13.9479504264847	-0.646796682456999	0.384777553655955	-1.68096261414283	0.0927701765405034	0.994731562947848
ENSSSCG00000002723	2.09799658304176	-1.14450935356917	0.687597224500563	-1.66450548778827	0.0960114553019094	0.994731562947848
ENSSSCG00000002724	7.89636965355288	0.124168712078911	0.394619758467148	0.314654067402072	0.753024322833654	0.994731562947848
ENSSSCG00000002729	3.29494031041188	0.69688265177338	0.545252721615078	1.27809110188238	0.201217306010584	0.994731562947848
ENSSSCG00000002734	11.2341288366938	0.151269506970002	0.301931296188076	0.501006384166864	0.616366629888012	0.994731562947848
ENSSSCG00000002736	1029.58847665417	0.452582905620912	0.41793531626992	1.0829017984415	0.278852013548096	0.994731562947848
ENSSSCG00000002737	0.193788701890873	-0.15768739943305	2.39034856527503	-0.0659683703556039	0.947403007381415	0.994731562947848
ENSSSCG00000002738	0.251056273638405	-0.820533076165579	1.76890132700298	-0.463865939631463	0.642743796886506	0.994731562947848
ENSSSCG00000002740	62.7615571169357	0.114070229724728	0.170755703398332	0.668031740401839	0.504113331925194	0.994731562947848
ENSSSCG00000002741	1.39771716103081	-0.5683167547138	0.835455046852474	-0.680248155606815	0.496347345555153	0.994731562947848
ENSSSCG00000002743	83.5849031777544	0.0732961131211973	0.170748659680465	0.429263182846424	0.667731706898637	0.994731562947848
ENSSSCG00000002745	0.510146446119504	-1.10543573896387	1.42269082693434	-0.777003490875038	0.437156710764669	0.994731562947848
ENSSSCG00000002746	3.29402292232469	1.14812051452487	0.563266376714927	2.03832602475034	0.0415173388879081	0.994731562947848
ENSSSCG00000002747	0.137854241557548	0.202981706296044	2.62774389927965	0.077245619845864	0.938428150647345	0.994731562947848
ENSSSCG00000002748	13.7755886650254	0.325751672534395	0.274680167510234	1.18593080631589	0.235649626142563	0.994731562947848
ENSSSCG00000002749	35390.4274528572	-0.0623733935903846	0.16419079301627	-0.379883624681707	0.704031803363314	0.994731562947848
ENSSSCG00000002752	10.4124584756731	0.430229344324682	0.311604971948413	1.3806883171168	0.167374814987138	0.994731562947848
ENSSSCG00000002753	30.2522787489417	0.13803201729669	0.274603684059998	0.502659014824185	0.615204029873057	0.994731562947848
ENSSSCG00000002754	26.3795337802554	0.023182442175443	0.2132674112561	0.10870128745364	0.913439420667777	0.994731562947848
ENSSSCG00000002759	34.8461930184767	-0.19801438985211	0.231833339133238	-0.854123874471345	0.393036356864916	0.994731562947848
ENSSSCG00000002761	2.01574481910795	-0.107986406919571	0.63195073766511	-0.17087788728367	0.86431978430898	0.994731562947848
ENSSSCG00000002762	21.2874257899705	-0.0524718441664011	0.20828616048241	-0.25192189459382	0.801101435821999	0.994731562947848
ENSSSCG00000002763	1.36886286330986	-1.04806877466467	0.906011475797101	-1.1567941495913	0.24735647266089	0.994731562947848
ENSSSCG00000002764	12.0895193158525	0.248244949552854	0.290079742532083	0.85578174948014	0.392118511978489	0.994731562947848
ENSSSCG00000002768	0.0703561851761459	0.563647170019878	3.06038250977364	0.184175399061984	0.853875858043919	0.994731562947848
ENSSSCG00000002769	23.0726873107113	0.0253867001904284	0.221820098541551	0.114447249628613	0.908883260238093	0.994731562947848
ENSSSCG00000002771	22.692400900004	0.0451964573414463	0.227638766014603	0.198544642165856	0.842618960483181	0.994731562947848
ENSSSCG00000002774	7.70863609019033	0.298514763688633	0.377813016415044	0.790112438478568	0.429462106322303	0.994731562947848
ENSSSCG00000002775	0.0504719948606048	-0.157691905206694	3.06038250977364	-0.0515268613328854	0.958905698028026	0.994731562947848
ENSSSCG00000002776	28.2757815265642	-0.0446617404120035	0.217393746990209	-0.205441697520468	0.83722704506929	0.994731562947848
ENSSSCG00000002777	0.0436952498058356	-0.157691905206694	3.06038250977364	-0.0515268613328854	0.958905698028026	0.994731562947848
ENSSSCG00000002778	0.0404223133994059	-0.157691905206694	3.06038250977364	-0.0515268613328854	0.958905698028026	0.994731562947848
ENSSSCG00000002779	0.114841355958766	0.202980566846215	2.78807171144504	0.0728032087600111	0.941962717513999	0.994731562947848
ENSSSCG00000002781	0.0372208994596494	0.563647170019878	3.06038250977364	0.184175399061984	0.853875858043919	0.994731562947848
ENSSSCG00000002786	0.936671044742028	0.354015996751148	1.05009007891567	0.337129170020069	0.736019528764615	0.994731562947848
ENSSSCG00000002787	4.90789242734917	-0.485551025469666	0.476760075083887	-1.0184389399306	0.308469404626593	0.994731562947848
ENSSSCG00000002790	75.1243817826304	-0.120713014419167	0.146190255689051	-0.82572544832212	0.408959852924465	0.994731562947848
ENSSSCG00000002792	0.721126986316114	-1.7472606027393	1.18537327414603	-1.47401720694106	0.140476958322829	0.994731562947848
ENSSSCG00000002795	3.12572763895271	-0.851721870005539	0.707224518484946	-1.20431609445632	0.228467428346017	0.994731562947848
ENSSSCG00000002799	94.3145810528876	0.0512518798151176	0.150198823748379	0.341226905351653	0.732932769927038	0.994731562947848
ENSSSCG00000002802	3.45037470288078	-0.231624718536584	0.53293801953684	-0.434618492292746	0.663839370007766	0.994731562947848
ENSSSCG00000002803	0.589142461187819	-1.10644594286838	1.34103850256033	-0.825066499400235	0.409333837819029	0.994731562947848
ENSSSCG00000002804	68.5398780460116	0.224533201050163	0.129630001241427	1.73210829977534	0.0832542817143442	0.994731562947848
ENSSSCG00000002805	3.56965642709747	0.343513340237381	0.615294685467045	0.558290764329671	0.576645850524313	0.994731562947848
ENSSSCG00000002806	4.92803663980905	-0.317780248841694	0.485900719624273	-0.65400242479044	0.513110243414596	0.994731562947848
ENSSSCG00000002810	0.0908342549890099	0.202978862886978	3.01194709849946	0.0673912443509055	0.946270239339948	0.994731562947848
ENSSSCG00000002811	0.0536133555293605	-0.157691905206694	3.06038250977364	-0.0515268613328854	0.958905698028026	0.994731562947848
ENSSSCG00000002812	0.0703561851761459	0.563647170019878	3.06038250977364	0.184175399061984	0.853875858043919	0.994731562947848
ENSSSCG00000002813	3.73023641556696	-0.214583730997135	0.510907802749482	-0.420004802906394	0.674481945055186	0.994731562947848
ENSSSCG00000002814	0.579372343804738	-0.745360862419244	1.43673964651078	-0.518786311931605	0.603909764289984	0.994731562947848
ENSSSCG00000002815	15.205490485107	-0.0307213328757562	0.298965562924129	-0.102758767850304	0.918154430456274	0.994731562947848
ENSSSCG00000002817	0.157762017845151	0.935219786856052	2.51751675327511	0.371485030095389	0.710276303804209	0.994731562947848
ENSSSCG00000002818	2.24732147982334	-0.834902112858951	0.725973253701125	-1.150045278669	0.250125222719538	0.994731562947848
ENSSSCG00000002819	0.139718726327979	-0.868472943730815	2.28387611583429	-0.38026271990395	0.703750405865244	0.994731562947848
ENSSSCG00000002820	10.753920591145	-0.515836555506983	0.327106846595096	-1.5769665504602	0.114803221906773	0.994731562947848
ENSSSCG00000002822	45.6562304110924	-0.0247633991225745	0.345830556372353	-0.0716055844871959	0.942915795708556	0.994731562947848
ENSSSCG00000002825	18.042389435828	-0.0692296558918596	0.330344701600788	-0.209567931788783	0.834004910543868	0.994731562947848
ENSSSCG00000002828	1.89332692046939	0.161060779097938	0.65124210677427	0.24731321488978	0.804665832388273	0.994731562947848
ENSSSCG00000002829	2.38784385629587	0.133526492987886	0.597326845788879	0.223540083505773	0.823115190150821	0.994731562947848
ENSSSCG00000002831	0.340445988319186	0.182884788761896	1.53516508086334	0.119130373040433	0.90517206787823	0.994731562947848
ENSSSCG00000002834	1.04949044614165	0.440522211598498	0.928328325527815	0.474532769802141	0.63512003544459	0.994731562947848
ENSSSCG00000002835	0.67435314616051	0.568594477504243	1.43926477592526	0.395058982207572	0.692799359279591	0.994731562947848
ENSSSCG00000002836	68.7871090748957	-0.159535156746806	0.271834651746995	-0.586883076611183	0.557282236454074	0.994731562947848
ENSSSCG00000002838	1.32166165692985	0.260830618828515	0.820503333392533	0.317890992288916	0.750567625580142	0.994731562947848
ENSSSCG00000002841	39.5260368184645	0.17125772291428	0.198517998417674	0.862681088260627	0.388312833107992	0.994731562947848
ENSSSCG00000002844	25.0986693006425	0.526065958713744	0.260119229351319	2.02240318805203	0.0431347159881808	0.994731562947848
ENSSSCG00000002846	46.609092214674	0.0840226617965428	0.201263949908692	0.417474971720775	0.676331027344706	0.994731562947848
ENSSSCG00000002847	401.418492880566	0.116924475989038	0.414357180855966	0.282182815674871	0.777803334232056	0.994731562947848
ENSSSCG00000002849	0.304091126443993	0.604807405813544	1.70713787338301	0.354281523035399	0.723127913417892	0.994731562947848
ENSSSCG00000002850	62.5165230854076	-0.0941722699809101	0.157500999903098	-0.597915378561718	0.549896398003038	0.994731562947848
ENSSSCG00000002852	5.6230751192421	-0.245636095944038	0.491503776711845	-0.499764411959031	0.61724097198219	0.994731562947848
ENSSSCG00000002854	22.8268798704186	-0.241970953774751	0.241632240836604	-1.00140177046314	0.316632608496506	0.994731562947848
ENSSSCG00000002855	0.285182032729932	0.60540230796345	1.72781122754904	0.350386835269172	0.726048404906945	0.994731562947848
ENSSSCG00000002859	16.1955738320982	0.152869104914404	0.267551782203688	0.571362685964185	0.567753817345054	0.994731562947848
ENSSSCG00000002860	48.7652293813577	-0.186108902582922	0.185132516301569	-1.00527398590403	0.314764937849256	0.994731562947848
ENSSSCG00000002863	0.201266684195797	-0.518359835084159	2.73989333821571	-0.189189786278954	0.849944072479044	0.994731562947848
ENSSSCG00000002865	7.09826935230743	-0.276018928073018	0.373429496771495	-0.73914602477671	0.45981833189157	0.994731562947848
ENSSSCG00000002866	0.814466735562801	1.76531710603711	1.12516520445966	1.56894036452618	0.116661835356475	0.994731562947848
ENSSSCG00000002867	23.8804330369498	0.0355669130214986	0.294621366724078	0.120720752255582	0.903912221286338	0.994731562947848
ENSSSCG00000002868	77.3665683743869	0.10693342249159	0.214090397269166	0.499477902117895	0.617442750546452	0.994731562947848
ENSSSCG00000002869	45.1290980858082	-0.0896817127509151	0.186400150843921	-0.481124679056771	0.630427889047304	0.994731562947848
ENSSSCG00000002872	23.4778832251227	0.021061049444607	0.253672957598203	0.0830244171235862	0.933832124579373	0.994731562947848
ENSSSCG00000002873	101.459366420407	-0.220349198461226	0.153969841758395	-1.43111921103999	0.152396052303651	0.994731562947848
ENSSSCG00000002875	1.23895985517029	-0.359941156313693	0.86631554483954	-0.415485048672839	0.677786858065968	0.994731562947848
ENSSSCG00000002876	0.079655737736168	0.563647170019878	3.06038250977364	0.184175399061984	0.853875858043919	0.994731562947848
ENSSSCG00000002877	7.83001596743194	0.200620539167137	0.381592586966083	0.52574537876169	0.599065129990536	0.994731562947848
ENSSSCG00000002883	0.396664461029344	-0.81470286175696	1.50519230867435	-0.541261642822559	0.588327254666807	0.994731562947848
ENSSSCG00000002884	23.3021821824518	-0.0367865957871932	0.218776893687626	-0.168146622648907	0.866467931891608	0.994731562947848
ENSSSCG00000002893	1.47441270693424	-0.291015193069261	0.790648980703259	-0.368071293547247	0.712820075087344	0.994731562947848
ENSSSCG00000002895	7.79827695083305	0.704036129001984	0.38346339647972	1.83599304513858	0.066358685262068	0.994731562947848
ENSSSCG00000002898	0.160842652789816	0.555656247229351	2.19262140481461	0.253420971814481	0.799942923309197	0.994731562947848
ENSSSCG00000002900	0.689645454047101	-1.33047926555889	1.26238569843734	-1.05394038225072	0.29191021300366	0.994731562947848
ENSSSCG00000002902	0.0504719948606048	-0.157691905206694	3.06038250977364	-0.0515268613328854	0.958905698028026	0.994731562947848
ENSSSCG00000002903	0.0852775700134604	0.563647170019878	3.06038250977364	0.184175399061984	0.853875858043919	0.994731562947848
ENSSSCG00000002904	3.07213285504131	-0.730869896575803	0.543815143978147	-1.34396753137344	0.178958886498596	0.994731562947848
ENSSSCG00000002905	12.3966388208473	-0.162025219904861	0.297321336258584	-0.544949857765826	0.585788004301909	0.994731562947848
ENSSSCG00000002906	8.32706935734317	-0.213385218479621	0.372510225559502	-0.572830499240983	0.566759466271732	0.994731562947848
ENSSSCG00000002907	132.38685680027	-0.117341572642436	0.151999402979103	-0.771987062729244	0.440122089965405	0.994731562947848
ENSSSCG00000002908	0.579099531001919	0.539233612783647	1.27912095162056	0.421565773041616	0.673341993297099	0.994731562947848
ENSSSCG00000002913	71.9955967120723	-0.471929195497403	0.214286266924251	-2.20233056588842	0.0276419666000396	0.994731562947848
ENSSSCG00000002915	0.0684770495784786	-0.157691905206694	3.06038250977364	-0.0515268613328854	0.958905698028026	0.994731562947848
ENSSSCG00000002916	0.114841355958766	0.202980566846215	2.78807171144504	0.0728032087600111	0.941962717513999	0.994731562947848
ENSSSCG00000002917	0.486214612480247	-1.36371404833747	1.32900646652673	-1.02611543486424	0.304837175703771	0.994731562947848
ENSSSCG00000002918	3.7625440709555	-1.6466573530026	0.565019076716956	-2.9143393928759	0.00356442162816188	0.994731562947848
ENSSSCG00000002919	22.9494067302136	-0.350302257449234	0.226782189201822	-1.54466388512322	0.122427584732967	0.994731562947848
ENSSSCG00000002921	1.24048155107086	-1.50042115198933	0.931282761830706	-1.61113381830436	0.107150558789062	0.994731562947848
ENSSSCG00000002923	0.241975025361604	0.971933227143622	1.98649607628529	0.489270146941906	0.624650453231775	0.994731562947848
ENSSSCG00000002926	13.2020942633073	0.121752342278818	0.280224451481905	0.434481508073108	0.663938820258795	0.994731562947848
ENSSSCG00000002927	0.0703561851761459	0.563647170019878	3.06038250977364	0.184175399061984	0.853875858043919	0.994731562947848
ENSSSCG00000002929	0.2683973952533	0.533239886282239	1.7459195113803	0.305420658172648	0.760045790023594	0.994731562947848
ENSSSCG00000002930	7.64010755447429	-0.0982692259969712	0.324514832283414	-0.302818904471979	0.762027875752305	0.994731562947848
ENSSSCG00000002931	3.4483727728217	0.957479120662195	0.639221793316191	1.49788247314744	0.134163788143071	0.994731562947848
ENSSSCG00000002932	2.12062348971467	-1.20491602571634	0.674041021628231	-1.78760043833195	0.0738404947189754	0.994731562947848
ENSSSCG00000002933	1.39534101451159	0.317172959843168	0.787719843415897	0.402646908662054	0.687207995899908	0.994731562947848
ENSSSCG00000002935	4.90158359262595	-0.217170432582552	0.415866285052256	-0.522212163833533	0.601522617756097	0.994731562947848
ENSSSCG00000002937	3.47507519538774	0.409457976022149	0.502663501693446	0.81457669920873	0.415314652490564	0.994731562947848
ENSSSCG00000002938	0.776655637460332	0.483784936717734	1.11033394195096	0.435711202224151	0.663046277039999	0.994731562947848
ENSSSCG00000002950	0.0700083978008061	0.563647170019878	3.06038250977364	0.184175399061984	0.853875858043919	0.994731562947848
ENSSSCG00000002952	0.300224184893701	-0.121243618705722	1.90523873865132	-0.063636969082178	0.949259294315533	0.994731562947848
ENSSSCG00000002953	18.8061315185791	-0.0405542627675472	0.299188205960226	-0.135547665180821	0.892178880601676	0.994731562947848
ENSSSCG00000002954	11.3852221299064	-0.156318577013726	0.309303417503825	-0.505389103926705	0.613285570342002	0.994731562947848
ENSSSCG00000002959	2.50593946734958	0.0987501714507644	0.573990642064693	0.172041431016282	0.863404957329071	0.994731562947848
ENSSSCG00000002960	0.176569798221655	-0.157686504258099	2.133794175839	-0.0738995850881901	0.941090285999554	0.994731562947848
ENSSSCG00000002962	1.44024234987388	-0.528198208373039	0.796532784702576	-0.663121742779573	0.507252586408115	0.994731562947848
ENSSSCG00000002963	102.362654785341	-0.136156985207026	0.137209148314445	-0.992331683999612	0.321035752301684	0.994731562947848
ENSSSCG00000002965	62.8082978962461	0.169451227558764	0.172350991852045	0.983175238725807	0.325521199251527	0.994731562947848
ENSSSCG00000002972	0.114841355958766	0.202980566846215	2.78807171144504	0.0728032087600111	0.941962717513999	0.994731562947848
ENSSSCG00000002981	0.0703561851761459	0.563647170019878	3.06038250977364	0.184175399061984	0.853875858043919	0.994731562947848
ENSSSCG00000002987	0.301900026293696	-0.899115077102264	2.52324651015239	-0.356332634756309	0.721591472141053	0.994731562947848
ENSSSCG00000002988	3.28218932430122	0.143814256229044	0.555753755277469	0.258773341364544	0.795810127932873	0.994731562947848
ENSSSCG00000002989	59.10380596714	-0.0119897453931205	0.169670122062889	-0.0706650366449106	0.94366434796096	0.994731562947848
ENSSSCG00000002991	0.414118798807676	-0.914259161490514	1.50577393581247	-0.60716893801008	0.543738803913834	0.994731562947848
ENSSSCG00000002993	8371.30711638902	0.191075801620433	0.226171005271215	0.844828900111678	0.398206376268201	0.994731562947848
ENSSSCG00000002996	30.0170312008175	-0.164700171991663	0.26729014586489	-0.616184975539339	0.537772443371578	0.994731562947848
ENSSSCG00000002998	0.0404223133994059	-0.157691905206694	3.06038250977364	-0.0515268613328854	0.958905698028026	0.994731562947848
ENSSSCG00000003000	0.170952387522016	-0.157687755410782	2.4850207654699	-0.0634553069342115	0.94940394738082	0.994731562947848
ENSSSCG00000003006	9.76641145965598	0.0441305388517585	0.574951602741771	0.0767552236419783	0.938818271959928	0.994731562947848
ENSSSCG00000003013	11.1203282212975	-0.224655291547986	0.300896263564687	-0.74662040959405	0.455292725016289	0.994731562947848
ENSSSCG00000003015	12.949962226556	-0.417407121844804	0.27160590868183	-1.53681163959423	0.124339442259183	0.994731562947848
ENSSSCG00000003016	11.4298809629384	-0.41680340699532	0.361798278469778	-1.15203258776737	0.249307682435466	0.994731562947848
ENSSSCG00000003017	15.9189577592092	-0.372098617204547	0.246419700898435	-1.51001975835492	0.131038382594604	0.994731562947848
ENSSSCG00000003018	1.99160089045265	1.51056321904893	0.708302006915312	2.1326541564205	0.0329531071909402	0.994731562947848
ENSSSCG00000003021	3.80158005014192	0.230782074872327	0.489650780981158	0.471319732013677	0.637412426805691	0.994731562947848
ENSSSCG00000003022	0.201887979442419	-1.24411624119684	2.8255001496624	-0.440317174056952	0.659707403774095	0.994731562947848
ENSSSCG00000003024	0.0744417989192988	0.901547010715773	3.05987602153388	0.294635143506186	0.76827261262798	0.994731562947848
ENSSSCG00000003035	0.14496889566338	0.935957475250684	3.04372043075565	0.307504416566379	0.758459461846134	0.994731562947848
ENSSSCG00000003037	0.44957460571074	0.144925767342789	1.5005588319556	0.0965811964559325	0.923058989729163	0.994731562947848
ENSSSCG00000003040	0.691526241789079	1.05746840972065	1.29348323669786	0.817535457529599	0.413622494794003	0.994731562947848
ENSSSCG00000003042	619.797201419297	0.0333351638081484	0.217645218906047	0.153162858231857	0.878269846863065	0.994731562947848
ENSSSCG00000003044	1.19010905364168	-0.777014221867408	0.974793499152631	-0.79710648721278	0.425389189080581	0.994731562947848
ENSSSCG00000003045	0.0436952498058356	-0.157691905206694	3.06038250977364	-0.0515268613328854	0.958905698028026	0.994731562947848
ENSSSCG00000003046	54.582101740806	-0.169497309282759	0.191379639201323	-0.885660094198711	0.37580071828001	0.994731562947848
ENSSSCG00000003047	0.949401683378909	0.3637686667026	1.10018156375797	0.330644212451669	0.74091324608956	0.994731562947848
ENSSSCG00000003054	0.520064672582505	0.282564237713119	1.29316256609277	0.218506354206396	0.827034607989904	0.994731562947848
ENSSSCG00000003055	5.41799721802608	-0.109922995104417	0.411422598402045	-0.267177825261313	0.789332248623619	0.994731562947848
ENSSSCG00000003059	79.3766072845813	-0.15509598177357	0.215459627517155	-0.719837788456316	0.471624875446924	0.994731562947848
ENSSSCG00000003061	2.42535519330276	0.282565181770519	0.581223670815749	0.486155667703516	0.626856800567535	0.994731562947848
ENSSSCG00000003063	7.99068291815937	-0.216867107785978	0.346480400553753	-0.625914503213965	0.531371021156421	0.994731562947848
ENSSSCG00000003068	4.91960228272511	-0.298348171780181	0.489702785714316	-0.609243362471358	0.542363142118625	0.994731562947848
ENSSSCG00000003070	2.51202065369866	0.190212810400464	0.56975183281946	0.333852037753317	0.73849121352819	0.994731562947848
ENSSSCG00000003072	7.99902731426372	-0.0362320809133976	0.337377306207306	-0.10739335529324	0.914476925729243	0.994731562947848
ENSSSCG00000003076	1.56019432273112	0.413184099423066	0.746294621322803	0.553647430408516	0.579820159089189	0.994731562947848
ENSSSCG00000003079	5.87653540212299	-0.521471627132691	0.478512414447322	-1.0897765896732	0.275811568638332	0.994731562947848
ENSSSCG00000003080	0.108347358844704	-0.518360068314995	2.84166932255693	-0.18241392979834	0.855257894805258	0.994731562947848
ENSSSCG00000003083	0.158882600721486	-0.157687978064741	2.54244407615892	-0.0620222012131621	0.950545152023554	0.994731562947848
ENSSSCG00000003085	0.0876928943202542	0.202978580668231	3.04743931136787	0.0666062749505985	0.946895150153615	0.994731562947848
ENSSSCG00000003088	2481.22167274947	-0.134307208348454	0.127167220119108	-1.05614645207043	0.290901310677077	0.994731562947848
ENSSSCG00000003089	23.0914656267456	0.228318755662567	0.228687479466364	0.99838765198402	0.318091418940945	0.994731562947848
ENSSSCG00000003090	69.6051592744584	-0.152359730393546	0.218630317387375	-0.696882903589215	0.48587607782887	0.994731562947848
ENSSSCG00000003091	0.136517312388222	-0.157687072791948	2.30005259557859	-0.0685580291055391	0.945341428141493	0.994731562947848
ENSSSCG00000003092	106.286228484943	0.071545212787519	0.142433347307637	0.502306616673068	0.615451855603896	0.994731562947848
ENSSSCG00000003098	8.53235325204147	-0.0359318365503364	0.339224187711882	-0.105923568695682	0.91564299414654	0.994731562947848
ENSSSCG00000003100	0.101633860806112	0.202979715866139	2.90203779170938	0.0699438568463913	0.944238345866935	0.994731562947848
ENSSSCG00000003103	4.42712524598954	-0.864473504107645	0.507229867112532	-1.70430323637834	0.0883244506691904	0.994731562947848
ENSSSCG00000003104	5.48730531839824	-0.285309634887466	0.429502772809427	-0.664278912616145	0.50651181501933	0.994731562947848
ENSSSCG00000003105	9.87099189187668	-0.17325139033464	0.29637680001511	-0.584564616143395	0.558840505566661	0.994731562947848
ENSSSCG00000003106	45.3212806285087	-0.459166757554163	0.269138511865929	-1.70606114439281	0.0879966959587187	0.994731562947848
ENSSSCG00000003107	52.9845326623521	-0.0133014770228723	0.154308751509788	-0.0862004059570695	0.931307108003378	0.994731562947848
ENSSSCG00000003109	4.4056982279956	-0.517363108253036	0.515955351048595	-1.0027284477263	0.315991900247783	0.994731562947848
ENSSSCG00000003110	5.16999125772097	-0.395004202702329	0.436848339637437	-0.904213583666503	0.365882158753277	0.994731562947848
ENSSSCG00000003111	23.2149154836709	0.268515628569364	0.231433506570918	1.16022797453956	0.245956000188288	0.994731562947848
ENSSSCG00000003119	0.106763029068245	0.202980067979461	2.85543334458372	0.0710855563707976	0.94332966343484	0.994731562947848
ENSSSCG00000003120	10.6773115211228	-0.282566883490448	0.317895811658902	-0.888866330185055	0.37407492259369	0.994731562947848
ENSSSCG00000003121	2.64999861535884	-1.40268692600111	0.669267463151976	-2.09585405421478	0.036095139559541	0.994731562947848
ENSSSCG00000003123	0.0700083978008061	0.563647170019878	3.06038250977364	0.184175399061984	0.853875858043919	0.994731562947848
ENSSSCG00000003125	0.0436952498058356	-0.157691905206694	3.06038250977364	-0.0515268613328854	0.958905698028026	0.994731562947848
ENSSSCG00000003128	1.2182604462282	-0.309261451234316	0.963064965379821	-0.321122107387996	0.748117857525176	0.994731562947848
ENSSSCG00000003129	0.13284641067664	0.202981487371793	2.6592982280772	0.0763289672548529	0.939157380524838	0.994731562947848
ENSSSCG00000003131	0.0488244180679678	-0.157691905206694	3.06038250977364	-0.0515268613328854	0.958905698028026	0.994731562947848
ENSSSCG00000003132	242.570537805622	-0.115565354363459	0.119099854443646	-0.970323220824257	0.331885406248818	0.994731562947848
ENSSSCG00000003134	7.46519441819352	-0.328945061599274	0.385393900745427	-0.85352949531124	0.393365738173349	0.994731562947848
ENSSSCG00000003135	0.253619131583388	0.971546674449892	1.96547536208054	0.494306208662656	0.621089941026894	0.994731562947848
ENSSSCG00000003136	5.06240206855424	-0.444261041662715	0.46593082762024	-0.953491409726623	0.340341146557203	0.994731562947848
ENSSSCG00000003137	1.83603581170489	0.940428394462342	0.891044157766771	1.0554228836642	0.291231961567823	0.994731562947848
ENSSSCG00000003139	3.26767201029435	0.0401756668756374	0.5955789872311	0.0674564881182557	0.946218300535895	0.994731562947848
ENSSSCG00000003140	0.378460865089274	2.18674462414903	1.57827601151306	1.3855273780995	0.16589126690849	0.994731562947848
ENSSSCG00000003142	0.0488244180679678	-0.157691905206694	3.06038250977364	-0.0515268613328854	0.958905698028026	0.994731562947848
ENSSSCG00000003143	0.0992964129285726	-0.518360264141209	2.9243885868246	-0.177254235800469	0.859308696052151	0.994731562947848
ENSSSCG00000003144	5.41563194968961	0.336493435179216	0.459552070622214	0.732220474436375	0.464034009455141	0.994731562947848
ENSSSCG00000003145	0.153616092565535	-0.157686803516248	2.22285798096184	-0.0709387666089294	0.943446489786051	0.994731562947848
ENSSSCG00000003146	0.322527424087195	0.608934704100856	1.86968970530874	0.325687573917674	0.744660746660173	0.994731562947848
ENSSSCG00000003147	0.659129739848225	0.13483320775871	1.33228822210039	0.101204233079642	0.919388336462401	0.994731562947848
ENSSSCG00000003148	6.69569652992381	0.297267815031425	0.479792149920501	0.619576237503428	0.535536815217039	0.994731562947848
ENSSSCG00000003150	84.610483773427	-0.325682070290881	0.251636771049429	-1.29425468675605	0.195577462736343	0.994731562947848
ENSSSCG00000003152	3.24022730756262	0.455092850966602	0.500506315069625	0.909264952837397	0.363210285718848	0.994731562947848
ENSSSCG00000003153	0.914652486011095	-1.09591300548487	1.15778698109349	-0.946558411332126	0.343863844564115	0.994731562947848
ENSSSCG00000003154	7.09356640778597	-0.222883609171657	0.363930285937565	-0.612434902463418	0.540250055534078	0.994731562947848
ENSSSCG00000003155	6.85476709523466	0.392475408278265	0.423771578169887	0.926148492480834	0.35436881600378	0.994731562947848
ENSSSCG00000003156	0.424260674449124	-1.04182437439437	1.27862194504568	-0.814802513308304	0.415185362074428	0.994731562947848
ENSSSCG00000003157	1.36348494219896	1.20403026370467	0.864186137608242	1.39325338755953	0.163543180664502	0.994731562947848
ENSSSCG00000003158	38.7141478606542	-0.452863430447017	0.25183591694739	-1.79824798597581	0.0721377183270838	0.994731562947848
ENSSSCG00000003160	1.31682877399116	-0.6970966929915	0.843077411930517	-0.826847787791225	0.40832334017997	0.994731562947848
ENSSSCG00000003165	1015.62887389539	-0.0766580658191856	0.10178079717705	-0.753168259095449	0.451348810411767	0.994731562947848
ENSSSCG00000003167	1.15226754905838	-0.205644867486173	0.900868303174776	-0.22827406265872	0.819433187267864	0.994731562947848
ENSSSCG00000003168	33.262125347178	-0.103737086407262	0.181354155617819	-0.572013836980248	0.567312600488794	0.994731562947848
ENSSSCG00000003169	38.1990059658387	-0.0761335671395094	0.212203032644868	-0.358776998568736	0.719761921113858	0.994731562947848
ENSSSCG00000003177	6.74285089491267	-0.392561375350818	0.374657795036103	-1.04778648823519	0.294736989137257	0.994731562947848
ENSSSCG00000003178	23.9064699504525	-0.345884457516673	0.274690449639368	-1.25917904306747	0.207965669347548	0.994731562947848
ENSSSCG00000003187	620.191517568192	0.116555874716575	0.205783968625891	0.566399197638519	0.571122440074101	0.994731562947848
ENSSSCG00000003189	37.9697252281129	-0.151780713667081	0.282043134215619	-0.538147167060787	0.590475451443816	0.994731562947848
ENSSSCG00000003191	0.108899362977885	-0.518360057288616	2.83693992362047	-0.182718024083884	0.855019272669516	0.994731562947848
ENSSSCG00000003194	26.4924232145586	-0.223333709240378	0.214842550610202	-1.03952270444593	0.298561704354442	0.994731562947848
ENSSSCG00000003195	3.01436095288799	-0.403026534386845	0.635166126965562	-0.634521453957661	0.525740570191919	0.994731562947848
ENSSSCG00000003196	1.21746863584983	-0.0461389929200622	0.887982552886791	-0.0519593462394801	0.958561086632325	0.994731562947848
ENSSSCG00000003197	3.01511482786325	-0.297324932957188	0.598445268980307	-0.496828947221524	0.619309680216401	0.994731562947848
ENSSSCG00000003198	3.27377352481195	-0.315298023456617	0.565372487641259	-0.557681935978251	0.577061594915875	0.994731562947848
ENSSSCG00000003204	5.9232664950009	-1.01227340885657	0.435788976632725	-2.32285225908707	0.0201870905541383	0.994731562947848
ENSSSCG00000003211	37.1283469058668	-0.122127158800042	0.185943623829716	-0.656796701520046	0.511311645422284	0.994731562947848
ENSSSCG00000003212	0.860992188135152	-0.124966559057427	1.07529023281406	-0.116216585293802	0.907480892655368	0.994731562947848
ENSSSCG00000003214	0.665672689802857	0.125491348747874	1.14052822693433	0.110029147709205	0.912386258722373	0.994731562947848
ENSSSCG00000003216	2.38105791584986	-0.853739863475753	0.723837644078035	-1.17946319932445	0.238213782246086	0.994731562947848
ENSSSCG00000003217	4.06491177509715	-0.190113955047057	0.516205355683597	-0.368291326220927	0.712656019394746	0.994731562947848
ENSSSCG00000003218	0.913475883247632	-0.335745799911472	1.1179363138713	-0.300326410141216	0.763928190115039	0.994731562947848
ENSSSCG00000003219	1.60501193547914	-0.466543035568489	0.85089852402783	-0.548294564385953	0.583489659109484	0.994731562947848
ENSSSCG00000003222	0.330650677654935	-1.65895462265877	1.66015634294419	-0.999276140292132	0.317660940364926	0.994731562947848
ENSSSCG00000003225	0.433349585967494	0.194487944265543	1.31598186316639	0.147789228491026	0.882509110404919	0.994731562947848
ENSSSCG00000003226	31.5698324345573	-0.402372015512055	0.234442360465778	-1.71629399530291	0.0861082467942211	0.994731562947848
ENSSSCG00000003227	0.557743588953063	-0.277181782946652	1.23943033603448	-0.223636435939987	0.823040209847934	0.994731562947848
ENSSSCG00000003228	0.0703561851761459	0.563647170019878	3.06038250977364	0.184175399061984	0.853875858043919	0.994731562947848
ENSSSCG00000003229	363.075150050485	-0.0486347083342231	0.143260131897202	-0.339485296363691	0.734244171921343	0.994731562947848
ENSSSCG00000003230	0.0579386110002768	0.563647170019878	3.06038250977364	0.184175399061984	0.853875858043919	0.994731562947848
ENSSSCG00000003231	6.88943713972497	0.173553691084871	0.507257441163993	0.342141242298231	0.732244601394872	0.994731562947848
ENSSSCG00000003233	0.345355236518981	-0.469928277115275	1.41531270176701	-0.33203141364348	0.739865538647075	0.994731562947848
ENSSSCG00000003236	3.99027316800486	0.510769996508412	0.460273552996612	1.10970963502692	0.267124169656482	0.994731562947848
ENSSSCG00000003240	0.168558387543197	-0.518359248412226	2.46537728968413	-0.210255546111013	0.833468228800555	0.994731562947848
ENSSSCG00000003241	1.27003779343666	-0.839236359522998	0.852756734970713	-0.984145096845023	0.325044176219359	0.994731562947848
ENSSSCG00000003243	0.989340572100884	-0.912450365794825	1.07432347745358	-0.849325538298356	0.395700174042841	0.994731562947848
ENSSSCG00000003251	0.123621753330167	0.202981044590068	2.72200006147415	0.0745705510675631	0.940556405708198	0.994731562947848
ENSSSCG00000003253	14.3684343320511	-0.409030265819269	0.358778897979778	-1.14006221693206	0.254260381501585	0.994731562947848
ENSSSCG00000003257	0.302787549307176	0.894808181869696	1.66213008561976	0.538350270903164	0.590335251413415	0.994731562947848
ENSSSCG00000003259	0.338656706954153	-0.812392565215783	1.53074547656557	-0.53071694651582	0.595614940831928	0.994731562947848
ENSSSCG00000003262	1.90883314139994	0.977672192457309	0.68861359496895	1.41976893805211	0.155674960752253	0.994731562947848
ENSSSCG00000003263	10.2977264709353	-0.63821505088289	0.350885048561193	-1.81887217337956	0.0689309340718059	0.994731562947848
ENSSSCG00000003264	1.16874851668748	-0.129315453760279	0.905327855105416	-0.142838258020042	0.886417921334652	0.994731562947848
ENSSSCG00000003265	4.46364545568519	-0.35889729254717	0.564014841195115	-0.63632597288874	0.524563979567848	0.994731562947848
ENSSSCG00000003267	30.2048769968125	-0.25016030236746	0.206562453074732	-1.21106376615771	0.225870966874461	0.994731562947848
ENSSSCG00000003268	27.6079966967535	-0.183765886513769	0.222800310985393	-0.824800852839999	0.40948466241805	0.994731562947848
ENSSSCG00000003269	0.120480392661411	0.202980880570515	2.7448631461352	0.0739493627783646	0.941050677523841	0.994731562947848
ENSSSCG00000003271	0.50938138567022	-0.119423179337666	1.22303112961645	-0.0976452491238862	0.922213992557474	0.994731562947848
ENSSSCG00000003272	0.868485135463093	-0.938213783216175	1.05562039866312	-0.888779512412195	0.374121588643325	0.994731562947848
ENSSSCG00000003278	5.11514926896354	0.207594342326806	0.679149405389065	0.305668150011677	0.75985732591914	0.994731562947848
ENSSSCG00000003282	0.0679250454452981	-0.157691905206694	3.06038250977364	-0.0515268613328854	0.958905698028026	0.994731562947848
ENSSSCG00000003284	0.0504719948606048	-0.157691905206694	3.06038250977364	-0.0515268613328854	0.958905698028026	0.994731562947848
ENSSSCG00000003288	6.49138444108037	0.0392871586403081	0.464363413571782	0.0846043368019024	0.932575951163567	0.994731562947848
ENSSSCG00000003302	182.849846048165	-0.247623880977321	0.298595315484428	-0.8292959337811	0.406936971227504	0.994731562947848
ENSSSCG00000003317	5.61388526127248	-0.834003348517036	0.417899267685541	-1.99570425939249	0.0459661231863495	0.994731562947848
ENSSSCG00000003318	0.0404223133994059	-0.157691905206694	3.06038250977364	-0.0515268613328854	0.958905698028026	0.994731562947848
ENSSSCG00000003322	0.799392046571789	1.32425403433257	1.10709537426321	1.19615171837737	0.231637358218207	0.994731562947848
ENSSSCG00000003324	0.919583061166748	1.20142585241426	1.03405193138921	1.16186220047981	0.245291443370775	0.994731562947848
ENSSSCG00000003326	11.8379574288921	0.458404704964265	0.344313487489257	1.33135854859176	0.183071061767865	0.994731562947848
ENSSSCG00000003329	0.433785208139412	0.428077043648385	1.40221615401301	0.305286059088158	0.760148292701622	0.994731562947848
ENSSSCG00000003332	55.9495603896539	-0.369331035501915	0.165496369809022	-2.23165641595712	0.0256376798942743	0.994731562947848
ENSSSCG00000003334	29.3176865060878	-0.0918408877180928	0.216703604984992	-0.423808767392002	0.671705283594369	0.994731562947848
ENSSSCG00000003339	1.90028418248677	0.0556548994329844	0.626217994721697	0.0888746409430768	0.929181537378764	0.994731562947848
ENSSSCG00000003341	15.1154911266774	-0.640280624175999	0.340096981494727	-1.88264130237783	0.0597489950914875	0.994731562947848
ENSSSCG00000003342	0.0684770495784786	-0.157691905206694	3.06038250977364	-0.0515268613328854	0.958905698028026	0.994731562947848
ENSSSCG00000003343	0.0372208994596494	0.563647170019878	3.06038250977364	0.184175399061984	0.853875858043919	0.994731562947848
ENSSSCG00000003344	1.43739824382643	-0.271313135620181	0.878688487201377	-0.308770559273302	0.757496065838442	0.994731562947848
ENSSSCG00000003348	23.3794198322548	-0.376491071296383	0.223839280326939	-1.68197052253957	0.0925745560747579	0.994731562947848
ENSSSCG00000003350	2.29461540862367	-0.428327537077092	0.676319825968758	-0.63332098310671	0.526524053447605	0.994731562947848
ENSSSCG00000003351	2.23062082314514	-1.0121581416653	0.671574720469694	-1.50714151503112	0.131774387474537	0.994731562947848
ENSSSCG00000003352	39.1727156388502	-0.0882707245817035	0.171807635912517	-0.513776492603917	0.607408264933984	0.994731562947848
ENSSSCG00000003354	38.7501483732919	0.0105764677498052	0.202938718275013	0.0521165593224674	0.958435818465532	0.994731562947848
ENSSSCG00000003360	2.81371130991946	0.153410300515879	0.545157353526417	0.281405541947707	0.778399367938628	0.994731562947848
ENSSSCG00000003362	2.19409189827539	0.686541102295639	0.611428392778519	1.12284792529144	0.261502087153553	0.994731562947848
ENSSSCG00000003368	0.237362581791814	1.05009536167146	2.00631263059741	0.52339567904668	0.600698930496906	0.994731562947848
ENSSSCG00000003369	15.8185740779861	-0.17447433790447	0.271846300672923	-0.641812441341226	0.520994970593492	0.994731562947848
ENSSSCG00000003374	1.19335071206822	-0.405856699312245	0.890896001662214	-0.455560131098362	0.648706318232547	0.994731562947848
ENSSSCG00000003376	0.662978641558802	-1.15902169878042	1.13887264178227	-1.01769210731642	0.308824299291058	0.994731562947848
ENSSSCG00000003377	1.49682831800089	0.171557475558575	0.738144545535335	0.232417182510174	0.816214004564535	0.994731562947848
ENSSSCG00000003383	2.65311480951584	0.456649015041922	0.557892518087541	0.818525074699545	0.413057430201834	0.994731562947848
ENSSSCG00000003384	23.3039158768742	-0.100213041697058	0.247478292939068	-0.404936693666833	0.685524045462446	0.994731562947848
ENSSSCG00000003385	71.7262113899691	-0.17771724876572	0.19994752764727	-0.888819436063411	0.374100128545295	0.994731562947848
ENSSSCG00000003386	0.356521055085176	0.225676329304115	1.53026179029571	0.147475635041835	0.882756609858708	0.994731562947848
ENSSSCG00000003390	0.283396753956274	0.535336367385045	1.5685871143821	0.341285710227145	0.732888504431959	0.994731562947848
ENSSSCG00000003393	1.08295588476975	0.110184352976424	0.912067145510573	0.120807282137921	0.903843682042226	0.994731562947848
ENSSSCG00000003395	0.238914572719343	-0.157685952115691	1.95886841855399	-0.0804984911809918	0.93584079620544	0.994731562947848
ENSSSCG00000003396	25.6398235333819	0.0367328643115393	0.233674080854885	0.157196999244221	0.875089593157183	0.994731562947848
ENSSSCG00000003398	17.4685571057613	0.240855650438328	0.259350020999039	0.928689535132986	0.35305000564629	0.994731562947848
ENSSSCG00000003399	0.389037616733322	-0.806955033608829	1.38767382685803	-0.581516360682494	0.560892494908345	0.994731562947848
ENSSSCG00000003400	36.0847988768072	-0.0591199017050836	0.25065424097959	-0.23586236352529	0.813539473904809	0.994731562947848
ENSSSCG00000003401	48.7230623079287	-0.034941283264011	0.174889045210575	-0.199791148850633	0.841643923964194	0.994731562947848
ENSSSCG00000003402	0.221575171038682	0.891740620355744	2.02761287791408	0.439798262315796	0.660083226310291	0.994731562947848
ENSSSCG00000003403	1.94218897076552	0.43756103679521	0.627224579721885	0.697614619932827	0.485418236057009	0.994731562947848
ENSSSCG00000003404	15.8772015487028	-0.176513066148818	0.321139317164649	-0.5496463893218	0.582561934376514	0.994731562947848
ENSSSCG00000003405	7.72554862231715	-0.448533180146842	0.378918159474569	-1.18372046557179	0.23652373489729	0.994731562947848
ENSSSCG00000003407	0.0404223133994059	-0.157691905206694	3.06038250977364	-0.0515268613328854	0.958905698028026	0.994731562947848
ENSSSCG00000003410	21.3432773899606	0.0472110533401663	0.275354712553609	0.171455403476978	0.863865693995793	0.994731562947848
ENSSSCG00000003412	18.0698313934509	-0.113552975830182	0.266828058659541	-0.425566098260567	0.670424047974844	0.994731562947848
ENSSSCG00000003413	21.888782541433	0.0709446667502602	0.219371554177473	0.323399572092494	0.74639265356406	0.994731562947848
ENSSSCG00000003414	2.36647067248482	-1.75654357517862	0.890301293377272	-1.97297655102279	0.0484982339823883	0.994731562947848
ENSSSCG00000003417	16.6895686896727	-0.544955901297616	0.485241637968426	-1.12306088071749	0.261411638870566	0.994731562947848
ENSSSCG00000003419	5.24865375060997	0.174358059218876	0.479718075715165	0.363459431790105	0.716261712522725	0.994731562947848
ENSSSCG00000003420	5.11320838523428	-0.426380685484147	0.442937813149323	-0.962619746669508	0.33573838417221	0.994731562947848
ENSSSCG00000003421	1.16310017826744	0.859203158838248	0.92805331269045	0.925812285877626	0.354543541241099	0.994731562947848
ENSSSCG00000003423	0.0703561851761459	0.563647170019878	3.06038250977364	0.184175399061984	0.853875858043919	0.994731562947848
ENSSSCG00000003428	10.989644574404	-0.515447699981566	0.365927775258931	-1.40860501670537	0.158951994627231	0.994731562947848
ENSSSCG00000003429	5.86761619619652	0.129274281503195	0.456446994244185	0.283218606176289	0.777009266355922	0.994731562947848
ENSSSCG00000003432	10.188367789172	-0.679642517639143	0.364682858825887	-1.86365358609747	0.0623703672802221	0.994731562947848
ENSSSCG00000003433	36.4656953446081	-0.216026395122006	0.255620387389709	-0.845106281732765	0.398051501354447	0.994731562947848
ENSSSCG00000003434	24.6902238466174	-0.0735214261280823	0.24223553664216	-0.303512140073367	0.761499597109664	0.994731562947848
ENSSSCG00000003435	3.51329307934372	-0.953098189163789	0.565169857517528	-1.68639246500196	0.0917202317942626	0.994731562947848
ENSSSCG00000003438	2.37434230794391	0.26784730827674	0.59637329254406	0.449126933793654	0.65334009199122	0.994731562947848
ENSSSCG00000003439	142.705677097592	-0.098490964622905	0.198987376499629	-0.494960868148783	0.620627743338203	0.994731562947848
ENSSSCG00000003448	0.0504719948606048	-0.157691905206694	3.06038250977364	-0.0515268613328854	0.958905698028026	0.994731562947848
ENSSSCG00000003451	0.829170426596484	0.346481851290084	1.0216340963281	0.339144760864374	0.734500680132229	0.994731562947848
ENSSSCG00000003453	9.41337674204421	0.617034071835622	0.342856723881942	1.79968490875532	0.071910405344052	0.994731562947848
ENSSSCG00000003455	0.545451964834893	1.16411336385811	1.20740010546976	0.964148800869277	0.334971329051564	0.994731562947848
ENSSSCG00000003458	15.285772117341	-0.378419577651637	0.258158448487174	-1.46584231455217	0.142691250252521	0.994731562947848
ENSSSCG00000003459	0.724082894876583	1.14438579552708	1.07984859540067	1.05976504521216	0.289251502797015	0.994731562947848
ENSSSCG00000003460	0.710112202771617	0.234407655821336	1.14189198459067	0.20528006062269	0.837353321645274	0.994731562947848
ENSSSCG00000003461	119.816554430283	0.162364568553855	0.193208255798782	0.840360407388339	0.400706341149244	0.994731562947848
ENSSSCG00000003464	9.50491835431381	-0.285921590400847	0.319668574997279	-0.894431335339361	0.371091152976521	0.994731562947848
ENSSSCG00000003465	1.82226816714061	-1.56331805672525	0.743943437022724	-2.10139370673351	0.0356064199351187	0.994731562947848
ENSSSCG00000003468	20.9945504520163	-0.150212404094213	0.238391390960691	-0.630108341953434	0.528623702199038	0.994731562947848
ENSSSCG00000003470	0.902512408869161	0.370747193021206	1.04564741342848	0.354562339331568	0.722917494183039	0.994731562947848
ENSSSCG00000003471	0.706745615619993	0.579190012553	1.26843250689563	0.45661870805449	0.647945130041282	0.994731562947848
ENSSSCG00000003472	0.498622204542266	-1.23154447701325	1.44333053393963	-0.853265726771333	0.393511961762252	0.994731562947848
ENSSSCG00000003473	0.451102385374	0.744345398449728	1.36352911067877	0.545896228118803	0.585137271276209	0.994731562947848
ENSSSCG00000003477	35.2273794212628	0.303975115318462	0.235070641453897	1.29312241391947	0.195968724145469	0.994731562947848
ENSSSCG00000003479	0.775562744315573	1.07775010019032	1.08723351555702	0.991277480659862	0.321550105977611	0.994731562947848
ENSSSCG00000003483	0.0436952498058356	-0.157691905206694	3.06038250977364	-0.0515268613328854	0.958905698028026	0.994731562947848
ENSSSCG00000003485	25.7829200303644	0.32923117448641	0.212345800949315	1.55044824533636	0.121033966423941	0.994731562947848
ENSSSCG00000003486	111.772342696761	0.0781712813472075	0.215305795522786	0.363070957553182	0.716551878964196	0.994731562947848
ENSSSCG00000003488	21.4701968941035	0.252491107543723	0.277730861999084	0.909121534878453	0.363285976443627	0.994731562947848
ENSSSCG00000003492	4.65560454505384	-0.525779004960795	0.429076964497743	-1.22537224895363	0.220434997929377	0.994731562947848
ENSSSCG00000003493	163.897929596014	0.225474045027042	0.265275774137266	0.849960935031974	0.395346805547351	0.994731562947848
ENSSSCG00000003498	0.0703561851761459	0.563647170019878	3.06038250977364	0.184175399061984	0.853875858043919	0.994731562947848
ENSSSCG00000003503	0.0700083978008061	0.563647170019878	3.06038250977364	0.184175399061984	0.853875858043919	0.994731562947848
ENSSSCG00000003505	0.157746684787817	-0.15768800050222	2.54815901447179	-0.0618831083957715	0.950655919261272	0.994731562947848
ENSSSCG00000003506	245.884090010913	0.0433644034013014	0.135793716657307	0.319340279276228	0.749468491896002	0.994731562947848
ENSSSCG00000003511	98.7461432384837	0.0616532397120384	0.145494488037788	0.423749659135029	0.671748394882266	0.994731562947848
ENSSSCG00000003512	74.8669296728472	0.0444980095880926	0.167529465867742	0.265613033251249	0.790537246981817	0.994731562947848
ENSSSCG00000003513	0.652221662540923	0.653732427590136	1.32359543810732	0.493906528209967	0.621372193919179	0.994731562947848
ENSSSCG00000003514	0.364987420046979	-1.39002003668997	1.65309787497973	-0.840857675597105	0.400427671674831	0.994731562947848
ENSSSCG00000003520	88.186972116814	0.0608787103145748	0.207926514563888	0.292789548472276	0.769683017467888	0.994731562947848
ENSSSCG00000003524	513.777842789052	-0.315638350040449	0.231841901733327	-1.36143789229053	0.173375348252213	0.994731562947848
ENSSSCG00000003527	0.079655737736168	0.563647170019878	3.06038250977364	0.184175399061984	0.853875858043919	0.994731562947848
ENSSSCG00000003531	16.9161449738776	-0.1428339773507	0.254217472090439	-0.561857437162645	0.574213154868031	0.994731562947848
ENSSSCG00000003532	25.5904286772182	-0.0440990077398795	0.223673015660801	-0.197158372500129	0.843703605116881	0.994731562947848
ENSSSCG00000003539	0.136853808929851	0.935420116139949	2.63305217619855	0.355260759583753	0.722394249851703	0.994731562947848
ENSSSCG00000003541	0.0679250454452981	-0.157691905206694	3.06038250977364	-0.0515268613328854	0.958905698028026	0.994731562947848
ENSSSCG00000003543	10.3946694472126	0.0717937347084513	0.351526474166337	0.204234218428964	0.838170472422289	0.994731562947848
ENSSSCG00000003549	20.9621106449479	-0.116020067536925	0.239430305421104	-0.484567178465032	0.627983400414388	0.994731562947848
ENSSSCG00000003551	2.92196504254043	0.346464270992524	0.682591794294542	0.507571690560088	0.611753748143912	0.994731562947848
ENSSSCG00000003552	0.566370663326213	-2.53768395476028	1.25197373746064	-2.02694663540421	0.0426678704752046	0.994731562947848
ENSSSCG00000003553	9.47485926294331	-0.332097152017992	0.314476656622617	-1.056031171231	0.290953973938811	0.994731562947848
ENSSSCG00000003555	203.533534550575	-0.0737902934104517	0.136682178286558	-0.539867701374704	0.589288273585418	0.994731562947848
ENSSSCG00000003558	19.9893527447264	-0.193487717584292	0.232183289684353	-0.833340408981771	0.404652772520406	0.994731562947848
ENSSSCG00000003559	50.9542064071268	0.133270745316559	0.177421524017754	0.751153198882585	0.452560462475173	0.994731562947848
ENSSSCG00000003561	0.958477915094761	-1.41854130103953	1.02131123379025	-1.38894124935363	0.164850615898794	0.994731562947848
ENSSSCG00000003564	29.0240862577516	-0.20902471411882	0.221450355318041	-0.943889721100807	0.345226005211024	0.994731562947848
ENSSSCG00000003565	45.8530858441701	-0.219473785345194	0.363374865780875	-0.603987248467378	0.545852120013833	0.994731562947848
ENSSSCG00000003566	22.7227803788368	-0.404536320128266	0.252909609288969	-1.59952925974454	0.109703052536688	0.994731562947848
ENSSSCG00000003569	2.79389433277948	-0.718470175741275	0.584426850605161	-1.22935860150388	0.218937384634503	0.994731562947848
ENSSSCG00000003570	12.7125694692799	0.418202932798005	0.280896818214711	1.48881334952801	0.136536526009032	0.994731562947848
ENSSSCG00000003573	0.159311475472336	0.93585510612721	2.95061848357674	0.317172522078411	0.751112698543591	0.994731562947848
ENSSSCG00000003575	0.0488244180679678	-0.157691905206694	3.06038250977364	-0.0515268613328854	0.958905698028026	0.994731562947848
ENSSSCG00000003577	60.5125580606362	-0.0945846447897139	0.155057601789353	-0.609996825039303	0.541863910755232	0.994731562947848
ENSSSCG00000003578	10.7290992188938	-0.168447435317349	0.318752726700489	-0.528458021554832	0.597181475656349	0.994731562947848
ENSSSCG00000003579	14.4194990338048	0.189808861582199	0.306069557048619	0.620149430778074	0.535159411064746	0.994731562947848
ENSSSCG00000003580	18.4368505954145	-0.177843019689652	0.255954235993953	-0.694823506237474	0.487165915155607	0.994731562947848
ENSSSCG00000003582	158.83555755898	-0.0592334442146114	0.147493493963744	-0.401600386720596	0.687978145208464	0.994731562947848
ENSSSCG00000003583	14.5867734758036	0.237706937247572	0.292062001383362	0.813892037038933	0.415706802863823	0.994731562947848
ENSSSCG00000003584	3.91925034280374	0.378192577213392	0.466831287550079	0.810126885878061	0.417867253381209	0.994731562947848
ENSSSCG00000003586	173.322601990885	0.176123675748952	0.146381941143679	1.20317898760532	0.22890706432582	0.994731562947848
ENSSSCG00000003589	71.8754567239098	-0.0216657211360429	0.145516482605087	-0.148888433448745	0.881641668253385	0.994731562947848
ENSSSCG00000003590	8.08068172477815	-0.346116310951592	0.467737118392078	-0.739980423493911	0.459311873019943	0.994731562947848
ENSSSCG00000003591	236.570052253132	0.0690254314024416	0.188549673324767	0.366086189306458	0.714300762623104	0.994731562947848
ENSSSCG00000003592	16.7091177545514	0.0268893088046998	0.277336952414416	0.0969553770985408	0.922761831345987	0.994731562947848
ENSSSCG00000003596	32.7279759405433	0.282029379147525	0.240274447354873	1.17378015953141	0.240483092973002	0.994731562947848
ENSSSCG00000003600	2.98043399245157	0.195659258208938	0.564162850778812	0.346813438599928	0.728731480494031	0.994731562947848
ENSSSCG00000003603	8.25193693125055	0.0819595225716952	0.388918763804049	0.210736868980149	0.833092603313493	0.994731562947848
ENSSSCG00000003604	0.0700083978008061	0.563647170019878	3.06038250977364	0.184175399061984	0.853875858043919	0.994731562947848
ENSSSCG00000003608	2.46478614154539	-0.214434315059519	0.640267757394196	-0.334913499208891	0.737690338706807	0.994731562947848
ENSSSCG00000003610	0.208334538722286	-0.15768720749053	2.33771101091526	-0.067453678728575	0.946220537010564	0.994731562947848
ENSSSCG00000003613	30.6116600805927	-0.0104993641351242	0.186303715193742	-0.0563561715567813	0.955058071463306	0.994731562947848
ENSSSCG00000003616	6.69166899329499	-0.844690208561465	0.440725391575844	-1.91659074949418	0.0552899441382571	0.994731562947848
ENSSSCG00000003617	41.8358285207272	-0.120335404497746	0.196492164148961	-0.612418337489117	0.540261012396326	0.994731562947848
ENSSSCG00000003620	0.825128571872487	-0.417607823468357	1.03415879736822	-0.40381402211257	0.686349484431588	0.994731562947848
ENSSSCG00000003621	0.449905642549384	-0.179276675844886	1.50671796382707	-0.11898489309142	0.905287324317918	0.994731562947848
ENSSSCG00000003622	0.079655737736168	0.563647170019878	3.06038250977364	0.184175399061984	0.853875858043919	0.994731562947848
ENSSSCG00000003627	17.7002140802205	0.152680398825913	0.243413404829135	0.627247291220825	0.53049714814876	0.994731562947848
ENSSSCG00000003628	10.3417471413455	0.22316553019127	0.364609330633058	0.61206752389961	0.540493083298878	0.994731562947848
ENSSSCG00000003630	53.4860233651243	0.101191701664604	0.151928311128456	0.666049012939042	0.505379772828137	0.994731562947848
ENSSSCG00000003637	95.8497838696328	-0.0178285026615019	0.153951388472629	-0.115806053055972	0.907806253151421	0.994731562947848
ENSSSCG00000003642	6.13361624081736	0.431469998827568	0.390527675810361	1.1048384674204	0.269229588918977	0.994731562947848
ENSSSCG00000003643	19.72117164062	0.0403369422733218	0.240111749341257	0.167992371818478	0.866589280202755	0.994731562947848
ENSSSCG00000003644	7.98126455943648	-0.21026285573233	0.363721897273156	-0.57808687711321	0.563205466382534	0.994731562947848
ENSSSCG00000003645	39.6365688625216	-0.0445209024816468	0.243160651578759	-0.18309254475421	0.854725405322154	0.994731562947848
ENSSSCG00000003648	106.902002430466	-0.0604440848878529	0.137141479239983	-0.440742547206176	0.659399390726589	0.994731562947848
ENSSSCG00000003650	0.192854654649256	1.25216055233449	2.0709587490188	0.604628437397777	0.545425907189706	0.994731562947848
ENSSSCG00000003651	3.56346844613222	-0.461669966926028	0.487255560387241	-0.947490402283191	0.343388944621101	0.994731562947848
ENSSSCG00000003652	0.548434989586574	0.639353171695625	1.25020112723373	0.511400252142066	0.609070818403286	0.994731562947848
ENSSSCG00000003653	97.8360987300174	0.0554927136505777	0.121484483369699	0.456788489454274	0.647823079981847	0.994731562947848
ENSSSCG00000003654	44.716111584512	0.238495180837148	0.177059849267732	1.34697494561017	0.177988302008738	0.994731562947848
ENSSSCG00000003655	0.409633625027297	-1.4653936548697	3.03208014924939	-0.48329647724928	0.628885240985756	0.994731562947848
ENSSSCG00000003660	98.7270646373636	0.314190293696049	0.224424297346902	1.39998341271575	0.161518285669281	0.994731562947848
ENSSSCG00000003664	12.8972587007818	-0.139081724754838	0.26977325625729	-0.515550454053131	0.606168422306515	0.994731562947848
ENSSSCG00000003667	11.4754945135686	0.267885124538276	0.296363127250562	0.903908414732682	0.366043966843728	0.994731562947848
ENSSSCG00000003669	102.532268966493	0.587641543445441	0.622125339953726	0.944570982254395	0.344877947297248	0.994731562947848
ENSSSCG00000003670	30.9410676075404	0.194706975381115	0.197873841844963	0.983995527481957	0.325117711971373	0.994731562947848
ENSSSCG00000003672	3.41156268990158	-0.584059107326952	0.604251314775245	-0.966583097207156	0.333752487744359	0.994731562947848
ENSSSCG00000003673	25.1600211845348	0.206440000901264	0.236818718427958	0.87172163700423	0.383360253491239	0.994731562947848
ENSSSCG00000003680	90.8423713191226	0.174101626252326	0.135005002326045	1.2895938909868	0.197191697910854	0.994731562947848
ENSSSCG00000003682	296.749454055362	0.247414607945648	0.129511710937441	1.91036475508503	0.0560862655154814	0.994731562947848
ENSSSCG00000003684	1.21198383471373	0.614628616008423	0.873586376041284	0.703569369744128	0.481700992136293	0.994731562947848
ENSSSCG00000003687	4.56150855117309	-0.303486328405613	0.459847032773656	-0.659972353360805	0.509271571116162	0.994731562947848
ENSSSCG00000003690	0.485013865859741	-0.417054671912178	1.28581562767461	-0.324350290147289	0.745672849764417	0.994731562947848
ENSSSCG00000003691	164.681197271391	0.17029275513482	0.197623971131484	0.861700906827344	0.388852126456926	0.994731562947848
ENSSSCG00000003693	31.3866328034418	0.189074818975405	0.245041354337572	0.771603713530465	0.440349174172319	0.994731562947848
ENSSSCG00000003694	5.84780352578485	0.443804901462833	0.387406727952621	1.14557871467093	0.251969508614788	0.994731562947848
ENSSSCG00000003697	1.28362954626436	-1.32504762090129	0.940914206776573	-1.40825551507049	0.159055422965069	0.994731562947848
ENSSSCG00000003699	0.714480631193361	-0.321947027031516	1.06199752507929	-0.303152332683148	0.7617737736703	0.994731562947848
ENSSSCG00000003700	21.1023252108309	0.105892707219274	0.207673299044301	0.509900443179673	0.61012121145688	0.994731562947848
ENSSSCG00000003701	74.6883493740122	0.0688016226952116	0.176542627715759	0.389716770308784	0.696745994208361	0.994731562947848
ENSSSCG00000003702	7.95522028550801	0.301789013471802	0.351923989572909	0.857540328063597	0.391146337119772	0.994731562947848
ENSSSCG00000003703	0.0744417989192988	0.901547010715773	3.05987602153388	0.294635143506186	0.76827261262798	0.994731562947848
ENSSSCG00000003704	0.0372208994596494	0.563647170019878	3.06038250977364	0.184175399061984	0.853875858043919	0.994731562947848
ENSSSCG00000003705	7.38646223379006	0.0504680628949169	0.402345025784084	0.125434787708797	0.900179348982187	0.994731562947848
ENSSSCG00000003707	2.75049430790105	-1.18951469213045	0.601843369259915	-1.97645226796	0.0481035767362533	0.994731562947848
ENSSSCG00000003708	3.74676527044432	0.0612880112669202	0.543432284550372	0.11277948147234	0.910205385956154	0.994731562947848
ENSSSCG00000003709	1.43871535153066	-0.760118980492806	0.829169768368155	-0.916722979407168	0.359287821377221	0.994731562947848
ENSSSCG00000003710	17.9573711565493	0.110236487563321	0.290797993867372	0.379082696194934	0.704626455477848	0.994731562947848
ENSSSCG00000003711	6.23777156508227	0.747521894469462	0.454541196214135	1.64456357464529	0.100059843734239	0.994731562947848
ENSSSCG00000003712	149.873064415853	-0.219072338033884	0.134895484993491	-1.62401534821166	0.104372532929699	0.994731562947848
ENSSSCG00000003713	21.1745855057142	0.33843383916739	0.266721368655805	1.26886661114928	0.204488642572883	0.994731562947848
ENSSSCG00000003714	0.956797258303801	1.15075123056805	0.986155825955626	1.16690608145313	0.243248299712288	0.994731562947848
ENSSSCG00000003715	0.349581071521715	-0.634448033980672	1.69583068125882	-0.374122275880585	0.708313346381022	0.994731562947848
ENSSSCG00000003716	30.1298806490918	-0.0220771628334231	0.188879523203615	-0.116884892861698	0.906951269836775	0.994731562947848
ENSSSCG00000003718	3.86473688468602	0.119622441061809	0.511485450563017	0.233872617354286	0.815083871920865	0.994731562947848
ENSSSCG00000003719	0.331740442445118	0.598706612150949	1.53271805067099	0.390617577635267	0.696079930850774	0.994731562947848
ENSSSCG00000003721	0.54726534318787	0.602521559804807	1.28854751486276	0.467597471459156	0.640072473475247	0.994731562947848
ENSSSCG00000003722	151.20741437913	0.0764222376840207	0.191102541640969	0.399901733528995	0.689228895415833	0.994731562947848
ENSSSCG00000003723	0.0488244180679678	-0.157691905206694	3.06038250977364	-0.0515268613328854	0.958905698028026	0.994731562947848
ENSSSCG00000003726	0.079655737736168	0.563647170019878	3.06038250977364	0.184175399061984	0.853875858043919	0.994731562947848
ENSSSCG00000003728	30.9602219446185	0.287009241042259	0.265044650000012	1.0828712861861	0.278865558520452	0.994731562947848
ENSSSCG00000003729	309.766955216747	0.23275034194253	0.340800421437351	0.68295203674012	0.494637150662487	0.994731562947848
ENSSSCG00000003730	21.6515314489715	-0.130075018828971	0.282801750864038	-0.459951250059646	0.645551212653592	0.994731562947848
ENSSSCG00000003731	20.4074267621812	0.0484120403081802	0.25381956782751	0.190734074297534	0.848733941308876	0.994731562947848
ENSSSCG00000003732	0.21745334349507	1.34077919367027	2.71515591601493	0.493812965127302	0.621438275880653	0.994731562947848
ENSSSCG00000003737	0.286137058039146	0.533522449961573	1.71796910347017	0.310554158910016	0.756139580927836	0.994731562947848
ENSSSCG00000003738	39.4117637756869	-0.137798709787416	0.211655781445868	-0.65105100766009	0.515013560730352	0.994731562947848
ENSSSCG00000003740	0.0852775700134604	0.563647170019878	3.06038250977364	0.184175399061984	0.853875858043919	0.994731562947848
ENSSSCG00000003741	6.32594618129832	0.0631530642153074	0.361503132001985	0.174695759523767	0.861318699947457	0.994731562947848
ENSSSCG00000003743	77.4914801442722	-0.0709467968205348	0.161553811369201	-0.439152727003134	0.660550875861327	0.994731562947848
ENSSSCG00000003744	7.06245034912468	-0.0366516549087821	0.411040533064139	-0.0891679821344116	0.928948410545571	0.994731562947848
ENSSSCG00000003746	99.7433720157808	0.0171442652767424	0.19248596333848	0.0890676129281946	0.929028176207104	0.994731562947848
ENSSSCG00000003747	2.22871256950305	-0.119067951581607	0.64271953125532	-0.185256470032972	0.853027878866421	0.994731562947848
ENSSSCG00000003749	15.0584496209901	-0.0277538467955997	0.246395115013533	-0.11263959837059	0.910316289850843	0.994731562947848
ENSSSCG00000003753	0.254660459799642	0.615582272713424	2.28331936714511	0.269599724668871	0.787468212184856	0.994731562947848
ENSSSCG00000003755	45.4653492076748	-0.0899867763865012	0.313880850373343	-0.286690877380595	0.774349023310866	0.994731562947848
ENSSSCG00000003756	0.379678933532708	1.6223858248477	1.61989148266837	1.00153982054108	0.316565898602812	0.994731562947848
ENSSSCG00000003757	35.5615282451082	0.218348567564684	0.208634519534879	1.0465601188694	0.295302503694707	0.994731562947848
ENSSSCG00000003758	0.0951595104599262	0.915489869324434	2.96519642290344	0.308745101084404	0.757515433028572	0.994731562947848
ENSSSCG00000003760	2.64374515064707	-0.514907883606208	0.58045474157693	-0.88707671197129	0.375037601086163	0.994731562947848
ENSSSCG00000003761	17.7396577487505	-0.248999143044491	0.263796137391681	-0.943907463947362	0.345216937509701	0.994731562947848
ENSSSCG00000003762	24.5926017973599	0.18831883849175	0.201314115075645	0.935447762423354	0.349557592179149	0.994731562947848
ENSSSCG00000003763	1.09342061416591	-0.660267379605361	1.03083845116754	-0.640514892374778	0.521837910386552	0.994731562947848
ENSSSCG00000003766	19.0139216855923	-0.0291664565828214	0.337550810556872	-0.0864061221915133	0.931143580329474	0.994731562947848
ENSSSCG00000003768	16.1539041337374	0.128774122561315	0.313829594929775	0.410331353835926	0.681562895037833	0.994731562947848
ENSSSCG00000003770	8.52804586694821	-0.340159115837153	0.326567527474052	-1.04161953415341	0.297588108430305	0.994731562947848
ENSSSCG00000003771	53.1373668018391	-0.171135132464943	0.166335337159171	-1.02885613717294	0.303547282600626	0.994731562947848
ENSSSCG00000003772	37.4457683517271	0.100825876757274	0.200612869139003	0.502589276500565	0.615253070208643	0.994731562947848
ENSSSCG00000003773	0.780208674272493	-0.543102699618482	1.3099741319862	-0.41459040018983	0.678441776924665	0.994731562947848
ENSSSCG00000003774	0.0679250454452981	-0.157691905206694	3.06038250977364	-0.0515268613328854	0.958905698028026	0.994731562947848
ENSSSCG00000003775	37.8864762721163	0.146592296368122	0.213174085701812	0.687664712554112	0.491663946444671	0.994731562947848
ENSSSCG00000003776	515.755582697257	-0.218830542638868	0.196720781927383	-1.11239158616015	0.265969820652231	0.994731562947848
ENSSSCG00000003777	6.07360573454166	-0.0733665702420358	0.497172306594023	-0.147567692868189	0.882683953257193	0.994731562947848
ENSSSCG00000003779	12.2748769484449	0.192529167765298	0.298847743981185	0.644238317480553	0.519420907178954	0.994731562947848
ENSSSCG00000003780	353.640822405729	-0.0900405933933549	0.303924859792621	-0.296259389425376	0.767031997085415	0.994731562947848
ENSSSCG00000003781	0.100633342097899	-0.157691905206694	3.06038250977364	-0.0515268613328854	0.958905698028026	0.994731562947848
ENSSSCG00000003783	5.58740564776239	-0.206214001360973	0.418327722096498	-0.492948447995528	0.622049013528209	0.994731562947848
ENSSSCG00000003784	1.22197872252828	-0.91493694354772	0.913971173895775	-1.00105667408287	0.3167994096509	0.994731562947848
ENSSSCG00000003787	225.121277108799	0.23113889474841	0.202513484338535	1.141350638963	0.253724037039623	0.994731562947848
ENSSSCG00000003788	1.97124561026743	0.466890966446303	0.761687623777391	0.612969085845033	0.539896780825914	0.994731562947848
ENSSSCG00000003789	569.280634293561	0.257168034715156	0.263005947707307	0.977803114176533	0.328171710516614	0.994731562947848
ENSSSCG00000003790	23.2347047204079	0.29810199393658	0.331740298155552	0.898600488376002	0.368865498494538	0.994731562947848
ENSSSCG00000003791	167.492810047483	-0.0358660970990666	0.210614764621765	-0.170292415935213	0.864780175357204	0.994731562947848
ENSSSCG00000003792	4.38231135895811	-0.204122888116676	0.455869280877801	-0.447766271339069	0.654321887814182	0.994731562947848
ENSSSCG00000003794	0.301900026293696	-0.899115077102264	2.52324651015239	-0.356332634756309	0.721591472141053	0.994731562947848
ENSSSCG00000003795	7.74909883649497	-0.317264995674137	0.349678299329662	-0.907305361191524	0.364245339889063	0.994731562947848
ENSSSCG00000003798	681.591939328456	-0.0505538563859682	0.103393797448231	-0.488944768773779	0.624880799500151	0.994731562947848
ENSSSCG00000003799	0.482135549210405	0.952498479205604	1.37334620789023	0.693560351885965	0.487957965313774	0.994731562947848
ENSSSCG00000003801	0.171322887541078	0.555727972486413	2.15162352010066	0.258283090556852	0.796188435423186	0.994731562947848
ENSSSCG00000003805	10.2856177788372	0.19177595855914	0.359690785792343	0.533168949926496	0.593916633230374	0.994731562947848
ENSSSCG00000003806	44.4235924243636	-0.0153363341459327	0.223496933333983	-0.0686198862649039	0.94529218922628	0.994731562947848
ENSSSCG00000003807	0.463657041213008	-0.524135752981269	1.46255114578014	-0.358370888083842	0.720065774790231	0.994731562947848
ENSSSCG00000003809	314.421342669258	0.0172467251554423	0.180996750616391	0.0952874849780889	0.924086482962086	0.994731562947848
ENSSSCG00000003812	202.927381724301	-0.0393177444680541	0.124234925562663	-0.316478995660705	0.751638965539593	0.994731562947848
ENSSSCG00000003814	0.675665347575937	0.456798075457655	1.1402692327689	0.400605455562822	0.68871062839176	0.994731562947848
ENSSSCG00000003815	3.14938446431672	0.429293021072273	0.527677250532041	0.81355226256093	0.415901494873957	0.994731562947848
ENSSSCG00000003818	5.61289767526951	0.373643879023128	0.467815404103554	0.798699392421929	0.424464739176997	0.994731562947848
ENSSSCG00000003819	365.473870687465	-0.108344356877792	0.1616632993555	-0.670185238763071	0.5027397125722	0.994731562947848
ENSSSCG00000003820	43.9265506377186	0.411001194340791	0.165073274020934	2.4898106418406	0.0127811170959266	0.994731562947848
ENSSSCG00000003825	6.79785367756577	0.411065197632106	0.575694066350076	0.714034105368284	0.475206090418892	0.994731562947848
ENSSSCG00000003826	2.42910905477678	0.275683049614539	0.586064674591149	0.470396974202312	0.638071425552326	0.994731562947848
ENSSSCG00000003828	15.0189878055171	0.222433113580709	0.293107284462863	0.758879513992056	0.447924634689143	0.994731562947848
ENSSSCG00000003830	10.2350360517873	0.400147321479902	0.306287707150824	1.30644264244944	0.191402072495905	0.994731562947848
ENSSSCG00000003831	3.17277596404863	-0.156133665657186	0.524685780166453	-0.297575561524946	0.766027129088008	0.994731562947848
ENSSSCG00000003832	0.0809161492654849	0.202978476926801	3.06038250977364	0.066324544817051	0.947119442306996	0.994731562947848
ENSSSCG00000003833	37.9289843358493	0.0299202234567558	0.269473121304386	0.111032311170505	0.911590724527747	0.994731562947848
ENSSSCG00000003834	1016.01693096361	-0.181068627261347	0.133896517145652	-1.35230274185834	0.176278487644785	0.994731562947848
ENSSSCG00000003835	838.522264103999	-0.200532700242001	0.130516765436385	-1.53645165486225	0.124427646219579	0.994731562947848
ENSSSCG00000003839	146.376137929414	-0.0723853219360463	0.175538719972457	-0.412360999028613	0.680074844853055	0.994731562947848
ENSSSCG00000003843	1.7827386884433	0.0376969325774047	0.67846296938893	0.0555622550945664	0.955690534101491	0.994731562947848
ENSSSCG00000003844	20.2109866102279	-0.357637977330552	0.243050862808164	-1.47145323081132	0.141168586823909	0.994731562947848
ENSSSCG00000003849	61.5363577709203	0.0340642387836983	0.232645296488103	0.146421351722623	0.88358877272047	0.994731562947848
ENSSSCG00000003850	11.4714012149326	0.0475977876334906	0.316949598549065	0.150174626664253	0.880626843845269	0.994731562947848
ENSSSCG00000003851	86.1705434291059	-0.0787332677359954	0.338963979370138	-0.232276207879956	0.816323490500227	0.994731562947848
ENSSSCG00000003854	184.037853889077	-0.287304154312311	0.154815438622229	-1.85578490665504	0.0634842227623411	0.994731562947848
ENSSSCG00000003857	390.23079545188	0.217940211720995	0.163900701098248	1.32970884359032	0.183614219923604	0.994731562947848
ENSSSCG00000003859	18.4611454466579	0.416903088195577	0.231756778994731	1.79888195721367	0.0720373552588295	0.994731562947848
ENSSSCG00000003861	1.22041405052905	0.235207827679068	0.878475748730457	0.267745385138955	0.788895312490993	0.994731562947848
ENSSSCG00000003862	9.94215154286424	0.299008133333572	0.29258956932075	1.02193709101703	0.306810675964743	0.994731562947848
ENSSSCG00000003863	18.107195836342	0.384545686476899	0.243204335463069	1.58116295807273	0.113840782507877	0.994731562947848
ENSSSCG00000003867	62.424069019712	-0.113416004484291	0.17618017434812	-0.64375009789801	0.51973749783724	0.994731562947848
ENSSSCG00000003870	41.6859737971463	-0.0386149894713121	0.160389929863127	-0.240756944680163	0.809743501289491	0.994731562947848
ENSSSCG00000003871	0.365867426447633	-1.91613987663199	1.84786779182784	-1.03694641202476	0.29976083219053	0.994731562947848
ENSSSCG00000003872	63.7359852821525	0.0680104741969336	0.14539259418861	0.467771240870132	0.639948188947719	0.994731562947848
ENSSSCG00000003875	0.0679250454452981	-0.157691905206694	3.06038250977364	-0.0515268613328854	0.958905698028026	0.994731562947848
ENSSSCG00000003876	7.73399733279719	-0.482272279274404	0.433181328120221	-1.11332656319055	0.2655682020215	0.994731562947848
ENSSSCG00000003877	15.5538908839486	-0.453100121509663	0.283731493585936	-1.59693277536153	0.110280692942549	0.994731562947848
ENSSSCG00000003881	0.801594418213163	0.629610590933993	1.02657592312736	0.613311277568201	0.539670537886034	0.994731562947848
ENSSSCG00000003882	0.311769347353051	0.533901239464944	1.68275785344546	0.317277520572421	0.751033032870051	0.994731562947848
ENSSSCG00000003885	73.2992418196316	-0.103479553176105	0.261408535078441	-0.395853766385453	0.692212909899098	0.994731562947848
ENSSSCG00000003888	3.7508830332726	0.416316774999334	0.473503825879619	0.879225789202337	0.379278864041007	0.994731562947848
ENSSSCG00000003891	26.1291995761758	0.090574737656892	0.282035832662512	0.321146206146348	0.748099595835731	0.994731562947848
ENSSSCG00000003894	0.165959621655972	1.25036422784937	2.50220547137193	0.499704857236929	0.617282911850429	0.994731562947848
ENSSSCG00000003895	24.6267910164679	0.321850403262724	0.251617041783258	1.27912799936646	0.200851985225996	0.994731562947848
ENSSSCG00000003897	3.91406018887369	-0.154764105928688	0.49865798994324	-0.310361227634805	0.756286275208063	0.994731562947848
ENSSSCG00000003898	49.2671193883288	-0.0936177940726225	0.266843229124458	-0.350834437058016	0.725712560256261	0.994731562947848
ENSSSCG00000003901	15.5335059958408	-0.169134423930307	0.274386251587574	-0.61640998028039	0.537623968039762	0.994731562947848
ENSSSCG00000003903	66.9773210271392	-0.35752229953685	0.176047123242764	-2.0308329551278	0.0422719427786302	0.994731562947848
ENSSSCG00000003904	0.0643693610981611	0.563647170019878	3.06038250977364	0.184175399061984	0.853875858043919	0.994731562947848
ENSSSCG00000003905	15.3773736733277	0.0989842251055014	0.244947547831781	0.404103760097567	0.686136420074475	0.994731562947848
ENSSSCG00000003913	0.901200590367634	-0.165984359316097	0.935369988578202	-0.17745315900973	0.859152454949196	0.994731562947848
ENSSSCG00000003914	272.222658987103	-0.283831230570678	0.2254902757842	-1.2587293602067	0.208128102799566	0.994731562947848
ENSSSCG00000003917	32.1934219411402	0.362136668875112	0.183084660028129	1.97797384455625	0.0479316573807092	0.994731562947848
ENSSSCG00000003919	2.09156581828963	-0.6006052370123	0.653736819155644	-0.918726342793469	0.358238727512689	0.994731562947848
ENSSSCG00000003922	21.0037230509197	0.0634800656195133	0.212670424332304	0.298490332253834	0.765328953757383	0.994731562947848
ENSSSCG00000003923	5.7129013235346	-0.188645767426564	0.432201713154334	-0.436476213964476	0.662491253267019	0.994731562947848
ENSSSCG00000003928	0.508070479537728	-0.486767036865929	1.28362633400736	-0.37921241094072	0.70453013605501	0.994731562947848
ENSSSCG00000003929	0.0679250454452981	-0.157691905206694	3.06038250977364	-0.0515268613328854	0.958905698028026	0.994731562947848
ENSSSCG00000003930	1498.62063709003	-0.104488524205717	0.119590796335166	-0.873717103721568	0.382272334134966	0.994731562947848
ENSSSCG00000003931	1.67584516412089	0.309309845123373	0.937990621353654	0.329757929431101	0.741582878272177	0.994731562947848
ENSSSCG00000003940	198.532498349578	0.0726731719905231	0.16462370182004	0.441450235823069	0.658887080779368	0.994731562947848
ENSSSCG00000003941	0.186053818719937	0.195642197664498	1.88725011503773	0.103665219625957	0.917435028618364	0.994731562947848
ENSSSCG00000003943	52.4823609279382	-0.0687296469936802	0.185007856833256	-0.371495828177853	0.710268262633794	0.994731562947848
ENSSSCG00000003950	2.05255495681226	-1.67920773008802	0.866410002436229	-1.93812135751701	0.0526084183571356	0.994731562947848
ENSSSCG00000003951	65.6608308566184	0.0858368723186794	0.237061811656931	0.36208646056793	0.717287421071282	0.994731562947848
ENSSSCG00000003964	9.33011514578893	-0.158751577281118	0.31549933767646	-0.50317562772165	0.614840798664588	0.994731562947848
ENSSSCG00000003965	18.3577681798762	-0.400111008318685	0.273079614871719	-1.46518079903782	0.14287159676025	0.994731562947848
ENSSSCG00000003966	87.3986068276796	-0.235060430640372	0.161361025915112	-1.45673609415468	0.145189242332014	0.994731562947848
ENSSSCG00000003967	0.465692698765144	-0.741421079324986	1.64953216647366	-0.449473550376396	0.65309008409312	0.994731562947848
ENSSSCG00000003968	2.80356639569878	-0.589894929427077	0.541646141504939	-1.0890780607946	0.276119463764104	0.994731562947848
ENSSSCG00000003971	1.49115004166716	0.0412482587832981	0.777854580753544	0.0530282392157914	0.957709407721089	0.994731562947848
ENSSSCG00000003973	1.18810415256131	0.981694619530081	0.884176449922905	1.11029265664753	0.266872936441896	0.994731562947848
ENSSSCG00000003976	16.4190045311182	-0.0455929514406823	0.280816974722914	-0.162358245920388	0.87102374944947	0.994731562947848
ENSSSCG00000003979	3.58522951717321	0.793169202895066	0.482560298805029	1.64366858371731	0.100244678717594	0.994731562947848
ENSSSCG00000003980	7.0381508811492	0.0377471045898677	0.425853472765012	0.0886387149663957	0.929369039070659	0.994731562947848
ENSSSCG00000003981	5.99959546864125	-0.460932284664258	0.412278329827147	-1.1180123991904	0.26356169779488	0.994731562947848
ENSSSCG00000003983	31.9698270241936	-0.103523458396008	0.206298927597614	-0.501812877078693	0.615799154189208	0.994731562947848
ENSSSCG00000003984	5.99069797960742	0.0818736143604506	0.405050872348929	0.202131682585098	0.839813779917075	0.994731562947848
ENSSSCG00000003989	0.458076337498512	1.37247473983658	1.32831331158769	1.03324624383694	0.301488676830363	0.994731562947848
ENSSSCG00000003990	1.6526116484892	0.196135156912912	0.711175490385596	0.275790096206168	0.782709290911191	0.994731562947848
ENSSSCG00000003995	2.21045242169492	0.666338043157926	0.666345182887192	0.999989285239167	0.317315693207577	0.994731562947848
ENSSSCG00000003998	4.5239932782727	-0.105897167537747	0.495583640937551	-0.213681725525502	0.830795263124836	0.994731562947848
ENSSSCG00000004001	1393.2987903263	-0.296731489758795	0.172206574869295	-1.72311359182432	0.0848679853735075	0.994731562947848
ENSSSCG00000004002	229.453762212973	-0.201080577050473	0.145357539320627	-1.38335154812254	0.166557099306348	0.994731562947848
ENSSSCG00000004004	0.14496889566338	0.935957475250684	3.04372043075565	0.307504416566379	0.758459461846134	0.994731562947848
ENSSSCG00000004009	0.0679250454452981	-0.157691905206694	3.06038250977364	-0.0515268613328854	0.958905698028026	0.994731562947848
ENSSSCG00000004012	10.1200931157349	-0.323131796292494	0.323614486433144	-0.998508440873673	0.318032873471672	0.994731562947848
ENSSSCG00000004013	6.36284354541381	-0.53893128378336	0.37797220061664	-1.42584899869389	0.153911933757948	0.994731562947848
ENSSSCG00000004016	0.451957020607096	1.03234500315004	1.61946216798925	0.637461636063913	0.523824191455219	0.994731562947848
ENSSSCG00000004017	4.91960150537052	0.0734175536465735	0.497249495001784	0.147647316658029	0.882621111009899	0.994731562947848
ENSSSCG00000004018	86.3670777050926	0.129724385889194	0.136772251856326	0.948470059741832	0.342890207890433	0.994731562947848
ENSSSCG00000004020	7.21485359936062	0.767830503728261	0.399704772403953	1.92099408548535	0.0547324531405136	0.994731562947848
ENSSSCG00000004022	25.8852751081956	0.159260973555865	0.223418498026535	0.712837007511122	0.475946622477286	0.994731562947848
ENSSSCG00000004023	7.22286565600526	-0.266015281324575	0.361814961800121	-0.735224657380341	0.462202684536663	0.994731562947848
ENSSSCG00000004024	11.5791443969635	-0.686931635680896	0.315575943453702	-2.1767553894097	0.0294988231507358	0.994731562947848
ENSSSCG00000004027	0.244398377206277	0.211464297775013	1.76131630807748	0.120060375757169	0.904435320846744	0.994731562947848
ENSSSCG00000004028	0.0579386110002768	0.563647170019878	3.06038250977364	0.184175399061984	0.853875858043919	0.994731562947848
ENSSSCG00000004029	152.02515143866	0.0695924037479663	0.130723271313006	0.532364307050832	0.594473701073854	0.994731562947848
ENSSSCG00000004033	0.230856549711126	0.212551158145039	2.00874810245521	0.105812748689219	0.915730921587084	0.994731562947848
ENSSSCG00000004037	2.04341868276722	0.27643006154453	0.65499979066486	0.422030763191449	0.673002563218185	0.994731562947848
ENSSSCG00000004038	39.23323212454	0.372066231068345	0.237959889097851	1.56356700483815	0.117919288607629	0.994731562947848
ENSSSCG00000004039	6.99467776770884	-0.646436560756234	0.421237907435506	-1.53461155642837	0.124879272276081	0.994731562947848
ENSSSCG00000004040	1.19489118452224	-0.94354693669053	1.27210661196961	-0.741720016083898	0.458256989863598	0.994731562947848
ENSSSCG00000004041	272.06550622613	-0.0116834477501676	0.163587272856127	-0.0714202733879127	0.943063274979055	0.994731562947848
ENSSSCG00000004044	116.221346868635	0.0891551196126249	0.178858958183775	0.498466056819023	0.618155587750199	0.994731562947848
ENSSSCG00000004047	48.2085568170394	0.068598976698335	0.196265268225346	0.349521733104461	0.726697657749619	0.994731562947848
ENSSSCG00000004048	4.0745099222815	-0.122958330907958	0.506182760088324	-0.242912917236657	0.808072858724036	0.994731562947848
ENSSSCG00000004049	2.25865234639883	-0.883750168171625	0.644536128123168	-1.37114139861334	0.170330881854585	0.994731562947848
ENSSSCG00000004050	83.719726003563	-0.0419421666796647	0.127982451646445	-0.327718106194207	0.743124812015284	0.994731562947848
ENSSSCG00000004052	0.403191454176887	-0.754071965909789	1.3762527180817	-0.547916785923489	0.583749042353152	0.994731562947848
ENSSSCG00000004053	5.64723056236347	-0.138633140781381	0.434743261208559	-0.318885082648526	0.749813656584957	0.994731562947848
ENSSSCG00000004054	103.964335946169	0.230653036637223	0.328992184656846	0.70108971396328	0.483247029128164	0.994731562947848
ENSSSCG00000004055	0.113193779166129	0.202980470109747	2.80126057570044	0.0724604029594759	0.942235516459501	0.994731562947848
ENSSSCG00000004057	9.48976603358458	-0.0785697661166819	0.329393881464454	-0.238528310748724	0.811471360114831	0.994731562947848
ENSSSCG00000004058	25.4892006497252	0.291403812597254	0.275388844618872	1.05815401854983	0.289985230474827	0.994731562947848
ENSSSCG00000004063	22.5104133664088	-0.0173813076681754	0.233574068423325	-0.0744145434700991	0.940680536872639	0.994731562947848
ENSSSCG00000004064	99.9004330622273	-0.0916979379535706	0.170687275747902	-0.537227731544585	0.591110317878783	0.994731562947848
ENSSSCG00000004065	0.0488244180679678	-0.157691905206694	3.06038250977364	-0.0515268613328854	0.958905698028026	0.994731562947848
ENSSSCG00000004067	0.079655737736168	0.563647170019878	3.06038250977364	0.184175399061984	0.853875858043919	0.994731562947848
ENSSSCG00000004070	42.4072622769131	0.273530756470042	0.179139148826324	1.52691780809582	0.126781450757078	0.994731562947848
ENSSSCG00000004071	0.562927799466904	-0.19889998019718	1.28610380615864	-0.154653130831841	0.877094781495697	0.994731562947848
ENSSSCG00000004072	0.079655737736168	0.563647170019878	3.06038250977364	0.184175399061984	0.853875858043919	0.994731562947848
ENSSSCG00000004074	0.181134683751698	0.574398515637013	2.43984057831632	0.235424609600268	0.813879187077186	0.994731562947848
ENSSSCG00000004075	0.10094398972121	-0.518360598299771	3.06038250977364	-0.169377715577819	0.865499550639651	0.994731562947848
ENSSSCG00000004076	5.44637468185004	0.704354847857275	0.427524824031636	1.64751801127027	0.0994516172112673	0.994731562947848
ENSSSCG00000004077	0.929847937681377	-0.954305288168247	0.945085520640995	-1.00975548490151	0.312612452228454	0.994731562947848
ENSSSCG00000004081	1.83377341808905	-0.0669668929163054	0.733214469321272	-0.091333294306502	0.927227763505554	0.994731562947848
ENSSSCG00000004082	21.0716383887637	-0.0142616272579611	0.234649184344714	-0.0607785077019911	0.951535607040557	0.994731562947848
ENSSSCG00000004087	1.46039086338199	1.28140398039217	0.917057461227864	1.39729955271993	0.162323510289617	0.994731562947848
ENSSSCG00000004088	5.00867826780705	-0.296716441148127	0.482088097367706	-0.615481781791038	0.538236597056737	0.994731562947848
ENSSSCG00000004089	12.1092810162601	0.103930868746612	0.358278821198179	0.29008376325187	0.771752157051972	0.994731562947848
ENSSSCG00000004090	3.99597419504756	-0.840212862228028	0.470658932942272	-1.78518413955416	0.0742314537181834	0.994731562947848
ENSSSCG00000004092	0.149457760165867	-0.51835944446916	2.56039303812005	-0.202453075270726	0.83956253926949	0.994731562947848
ENSSSCG00000004093	289.553607825168	0.137828487678354	0.268748738222057	0.512852594546774	0.608054436111027	0.994731562947848
ENSSSCG00000004101	4.17493815163483	0.123253258107027	0.432585581146797	0.284922252332773	0.775703707378846	0.994731562947848
ENSSSCG00000004103	45.2319564864209	0.296880377122777	0.151860411022878	1.95495570651427	0.0505882985227991	0.994731562947848
ENSSSCG00000004104	18.2880701730509	-0.0190645662538161	0.24847536942886	-0.0767261813419876	0.93884137623035	0.994731562947848
ENSSSCG00000004105	6.34119356941101	0.123284788490594	0.451651891113713	0.272964180857497	0.784880749846214	0.994731562947848
ENSSSCG00000004106	31.770959269818	0.312946231152386	0.192656811693042	1.62437148420685	0.104296549202903	0.994731562947848
ENSSSCG00000004109	1.513058396678	-0.207476012942961	0.826602121576164	-0.250998645572487	0.801815156354088	0.994731562947848
ENSSSCG00000004110	38.3040616782235	-0.152637394540149	0.191703905890844	-0.796214317234933	0.425907477255369	0.994731562947848
ENSSSCG00000004112	0.0436952498058356	-0.157691905206694	3.06038250977364	-0.0515268613328854	0.958905698028026	0.994731562947848
ENSSSCG00000004113	6.20766060155136	0.135188783288632	0.387327992967247	0.349029209722169	0.7270673806833	0.994731562947848
ENSSSCG00000004114	38.6132343609955	0.142964154750727	0.227601955012726	0.628132367064835	0.52991723131247	0.994731562947848
ENSSSCG00000004120	18.2400417086656	-0.0396805531829492	0.247428645971976	-0.160371702423832	0.872588279281239	0.994731562947848
ENSSSCG00000004121	20.0394710982391	0.284292339739144	0.210444755163271	1.35091197458724	0.17672363188102	0.994731562947848
ENSSSCG00000004123	51.1242307467456	0.0627459776165271	0.159567333491492	0.393225707565468	0.694152784019834	0.994731562947848
ENSSSCG00000004125	5.6112438731902	0.200458657160259	0.43926579346206	0.456349345074994	0.648138785316754	0.994731562947848
ENSSSCG00000004130	20.4742184180265	0.35627710338387	0.262896612348646	1.35519853299359	0.175354311974235	0.994731562947848
ENSSSCG00000004132	42.0720841215127	-0.0920394289824904	0.180241947117598	-0.510643778844887	0.609600514857373	0.994731562947848
ENSSSCG00000004133	26.0918509347835	-0.109557533116644	0.261749261710163	-0.418559091249541	0.675538392272023	0.994731562947848
ENSSSCG00000004134	48.0031950521144	-0.193090585614104	0.204204157515518	-0.945576172215936	0.344364802311385	0.994731562947848
ENSSSCG00000004136	67.662883799282	-0.325093657717036	0.231506565829569	-1.40425243038837	0.160243694092451	0.994731562947848
ENSSSCG00000004138	6.70245284783064	-0.146165305379567	0.344061449868395	-0.424823255948831	0.670965523118238	0.994731562947848
ENSSSCG00000004139	45.3243119094428	-0.0648850364676431	0.280678052804731	-0.231172461898131	0.817180822830805	0.994731562947848
ENSSSCG00000004140	20.0379114975862	0.304248343666065	0.232107224120908	1.31080945377029	0.189922147786476	0.994731562947848
ENSSSCG00000004142	15.1837627162177	0.268801874481247	0.389928628028624	0.68936173227454	0.490595658876941	0.994731562947848
ENSSSCG00000004143	0.262824300971268	0.534959875661061	1.59596683980579	0.335194856383206	0.737478101841837	0.994731562947848
ENSSSCG00000004144	5.00373611712936	-0.0798297321741422	0.419592125616444	-0.190255553668602	0.849108880487587	0.994731562947848
ENSSSCG00000004145	6.14988949560405	-0.0923119258157718	0.368585193451301	-0.250449360028263	0.802239861772761	0.994731562947848
ENSSSCG00000004146	8.32389434282755	-0.282166380733431	0.410899137611579	-0.686704728497535	0.492268816641078	0.994731562947848
ENSSSCG00000004147	0.0744417989192988	0.901547010715773	3.05987602153388	0.294635143506186	0.76827261262798	0.994731562947848
ENSSSCG00000004148	40.9972779571375	-0.189849096918219	0.184284291446504	-1.03019685198362	0.302917607204823	0.994731562947848
ENSSSCG00000004149	13.8721423134848	-0.11363888039031	0.294145862475757	-0.386335131263918	0.699248485343626	0.994731562947848
ENSSSCG00000004150	6.03827841548929	0.285911736850577	0.466821891629435	0.612464286652466	0.540230619706668	0.994731562947848
ENSSSCG00000004151	0.100633342097899	-0.157691905206694	3.06038250977364	-0.0515268613328854	0.958905698028026	0.994731562947848
ENSSSCG00000004154	27.9086778611638	-0.181958346952739	0.251064974270292	-0.724746044252455	0.468607842125337	0.994731562947848
ENSSSCG00000004156	23.5265688718497	0.27977788586399	0.215608760092951	1.29761836088374	0.19441850963623	0.994731562947848
ENSSSCG00000004157	2.77104797854096	0.764084422246415	0.876021251503369	0.872221331314902	0.383087644625106	0.994731562947848
ENSSSCG00000004158	0.0436952498058356	-0.157691905206694	3.06038250977364	-0.0515268613328854	0.958905698028026	0.994731562947848
ENSSSCG00000004159	0.0852775700134604	0.563647170019878	3.06038250977364	0.184175399061984	0.853875858043919	0.994731562947848
ENSSSCG00000004160	3.02331811573431	-1.03022753531031	0.551407184336322	-1.86836074062092	0.0617118054309776	0.994731562947848
ENSSSCG00000004164	0.657485042859455	0.714614049932086	1.21676399796507	0.587307030062705	0.556997520506898	0.994731562947848
ENSSSCG00000004165	10.6341658659902	0.0655381841925449	0.30267403927462	0.216530576423441	0.828574193892738	0.994731562947848
ENSSSCG00000004166	11.5012992008695	-0.0663207035740038	0.325194036512321	-0.203941942740672	0.838398868240022	0.994731562947848
ENSSSCG00000004167	0.628832778109589	1.20905683638264	1.24215569226234	0.973353697860997	0.330377542858398	0.994731562947848
ENSSSCG00000004169	11.5853380390618	-0.453207906482534	0.289945870045139	-1.56307764070576	0.118034334047393	0.994731562947848
ENSSSCG00000004170	0.752657042909952	-0.449517037874866	1.15608604779567	-0.388826626471247	0.697404402640724	0.994731562947848
ENSSSCG00000004172	0.303553970392416	1.88951315633278	1.6607526295687	1.13774509381538	0.255226937856293	0.994731562947848
ENSSSCG00000004175	14.1856224318104	0.0614745013512618	0.284655372406634	0.215961149201304	0.829018031381907	0.994731562947848
ENSSSCG00000004177	2576.6010048813	0.154276702500649	0.151160905688863	1.02061245133183	0.307438087911409	0.994731562947848
ENSSSCG00000004178	14.1583842559401	-0.135421804236832	0.335581427458781	-0.40354379937628	0.686548220346261	0.994731562947848
ENSSSCG00000004179	0.34030826414817	-0.163825982059582	1.66022104338083	-0.0986772109128136	0.921394563596186	0.994731562947848
ENSSSCG00000004180	108.223871338806	-0.281148591777104	0.221594601577575	-1.26875199023601	0.204529533180901	0.994731562947848
ENSSSCG00000004181	7.20937531175036	0.146427953637284	0.434156965585035	0.337269617314489	0.735913661168425	0.994731562947848
ENSSSCG00000004190	12.5981582641918	-0.149871953884111	0.314894872066419	-0.475942821490277	0.634115113909438	0.994731562947848
ENSSSCG00000004191	9.65756373937654	-1.1283488335495	0.476352572089437	-2.36872623275696	0.0178494602426412	0.994731562947848
ENSSSCG00000004192	46.203316820138	0.366844255107728	0.481456871101115	0.761946245088864	0.446092087669143	0.994731562947848
ENSSSCG00000004193	53.2067812456764	0.0294920642451017	0.192667022866519	0.153072714812924	0.878340932696211	0.994731562947848
ENSSSCG00000004195	1636.93713022579	0.250722812929492	0.234694447340321	1.06829460931357	0.285387639374085	0.994731562947848
ENSSSCG00000004196	70.8482780746597	-0.140450214387234	0.228773699449406	-0.613926402926818	0.539263961965001	0.994731562947848
ENSSSCG00000004197	1.33640532620314	0.652262015614032	0.866610672735566	0.752658646073541	0.451655066293169	0.994731562947848
ENSSSCG00000004199	86.4717352535542	-0.0167325478080641	0.156775606591231	-0.106729281243936	0.91500375220671	0.994731562947848
ENSSSCG00000004202	0.576446370217259	0.690330897484123	1.32359934716506	0.521555785716201	0.601979654693746	0.994731562947848
ENSSSCG00000004203	10.7217278947191	-0.257700943999428	0.324151639497495	-0.795001204988259	0.426612801212664	0.994731562947848
ENSSSCG00000004205	13.5372178101385	0.0977159672236102	0.32062393210854	0.304768164313232	0.760542729906919	0.994731562947848
ENSSSCG00000004207	4.59630883906533	0.336973415260917	0.484577621342906	0.695396156196949	0.486807068756014	0.994731562947848
ENSSSCG00000004215	0.983432258373599	-0.387079546960794	1.00624715480184	-0.384676413854828	0.700477172022282	0.994731562947848
ENSSSCG00000004216	211.042589550153	-0.108797881156496	0.203873427801469	-0.533654053545627	0.593580903238579	0.994731562947848
ENSSSCG00000004217	0.136214917679639	-0.885658788678328	2.66728215088132	-0.332045407489302	0.739854972010514	0.994731562947848
ENSSSCG00000004220	11.504581811667	0.0557055113182753	0.273396878304167	0.203753282275229	0.838546302243513	0.994731562947848
ENSSSCG00000004221	17.803076575232	0.171261104615798	0.271065591442406	0.631806876352237	0.527513079793816	0.994731562947848
ENSSSCG00000004222	14.7214184239015	-0.0209254414065153	0.2869150574185	-0.0729325313031343	0.941859806630864	0.994731562947848
ENSSSCG00000004223	0.619030014278621	0.94368838147112	1.21951760616181	0.7738210393216	0.439036628874307	0.994731562947848
ENSSSCG00000004224	8.70566068445835	0.829439427748992	0.383493786147918	2.16284971936695	0.0305527400814939	0.994731562947848
ENSSSCG00000004225	4.6353636119365	-1.07887732189847	0.612142566778726	-1.76246087177999	0.0779914617588424	0.994731562947848
ENSSSCG00000004233	6.47784162459906	-0.0846389429354885	0.456103185640389	-0.185569725448534	0.85278219674354	0.994731562947848
ENSSSCG00000004234	0.079655737736168	0.563647170019878	3.06038250977364	0.184175399061984	0.853875858043919	0.994731562947848
ENSSSCG00000004235	0.0404223133994059	-0.157691905206694	3.06038250977364	-0.0515268613328854	0.958905698028026	0.994731562947848
ENSSSCG00000004236	0.697715584377311	-1.81375516048255	1.11266341658552	-1.63010226942529	0.103079884173248	0.994731562947848
ENSSSCG00000004237	64.1496068987977	-0.344424513349389	0.219453758524977	-1.56946281378083	0.11654013770415	0.994731562947848
ENSSSCG00000004238	25.1455887985519	0.331770682932778	0.230450824177221	1.43965934648877	0.14996380037696	0.994731562947848
ENSSSCG00000004241	5.99400230056222	0.153486746520851	0.379836274731386	0.404086593965768	0.68614904282209	0.994731562947848
ENSSSCG00000004242	1.22930796448331	0.432814739486643	0.830137917352025	0.521376906703932	0.602104235523407	0.994731562947848
ENSSSCG00000004244	243.782963538953	-0.145769198581695	0.218818823223349	-0.666163890447886	0.505306350641166	0.994731562947848
ENSSSCG00000004246	0.138833234754625	0.202981747508434	2.62176133520445	0.0774219013694491	0.938287918299597	0.994731562947848
ENSSSCG00000004247	8.21957122362175	0.302542446423981	0.399944949875165	0.75646022413438	0.449373311764422	0.994731562947848
ENSSSCG00000004249	3.59139236744452	-0.100714791365965	0.500004550245355	-0.201427749640565	0.840364118780052	0.994731562947848
ENSSSCG00000004252	0.307063032949451	0.60957907521227	1.89983596442557	0.320858793404609	0.748317402247534	0.994731562947848
ENSSSCG00000004253	52.8487397319193	0.191997721228714	0.180491720958339	1.06374807780259	0.287442838310609	0.994731562947848
ENSSSCG00000004254	33.0117941276687	-0.0160955386721184	0.216198689015537	-0.0744479013513433	0.940653994757885	0.994731562947848
ENSSSCG00000004261	1.82385167783773	1.15236956368342	0.839827010549596	1.37215110874952	0.170016401837028	0.994731562947848
ENSSSCG00000004263	4.97184078665093	0.172426587989332	0.411037353607947	0.419491285830422	0.67485712197873	0.994731562947848
ENSSSCG00000004272	50.2559227238726	0.107950364245585	0.234592580848014	0.460161032609652	0.645400638701821	0.994731562947848
ENSSSCG00000004275	7.87984968201887	-0.420069805402272	0.368444091726227	-1.1401181748747	0.25423707094794	0.994731562947848
ENSSSCG00000004276	23.5813689772024	0.0593573158235756	0.257208874917131	0.230774757841072	0.817489792276374	0.994731562947848
ENSSSCG00000004279	22.1860898334824	-0.604179833384944	0.257223537165414	-2.34885127559852	0.0188314268977839	0.994731562947848
ENSSSCG00000004280	11.8502037349988	-0.025521455451261	0.329505139097921	-0.0774538919821723	0.938262469900409	0.994731562947848
ENSSSCG00000004281	6.2094517105389	0.229661839536288	0.430108788255615	0.533962210973935	0.593367679108419	0.994731562947848
ENSSSCG00000004283	0.107226711058721	-0.518360598299771	3.06038250977364	-0.169377715577819	0.865499550639651	0.994731562947848
ENSSSCG00000004289	15.7893840798887	0.350305345789703	0.237594449774484	1.4743835393554	0.140378353868046	0.994731562947848
ENSSSCG00000004290	0.0679250454452981	-0.157691905206694	3.06038250977364	-0.0515268613328854	0.958905698028026	0.994731562947848
ENSSSCG00000004291	4.91161424392391	0.426572339999849	0.464460896858415	0.918424657242747	0.358396586701293	0.994731562947848
ENSSSCG00000004293	7.34246387715772	-0.179116513384783	0.335641579609988	-0.533654124715163	0.593580853990017	0.994731562947848
ENSSSCG00000004294	155.782438654885	0.0841241711542177	0.16176705429942	0.520032781202217	0.603040727281608	0.994731562947848
ENSSSCG00000004300	6.16757528601463	0.258720531822623	0.416291071129011	0.621489505217958	0.534277597514836	0.994731562947848
ENSSSCG00000004301	0.0724844478316902	0.563647170019878	3.06038250977364	0.184175399061984	0.853875858043919	0.994731562947848
ENSSSCG00000004302	0.149457760165867	-0.51835944446916	2.56039303812005	-0.202453075270726	0.83956253926949	0.994731562947848
ENSSSCG00000004303	10.7184653324513	0.413438346516422	0.337098579391055	1.2264612543407	0.220025147289252	0.994731562947848
ENSSSCG00000004304	22.1236149856277	0.281407583491183	0.251931516523216	1.11700031569988	0.263994190204179	0.994731562947848
ENSSSCG00000004306	4.93369327992603	-0.0860043230250522	0.441666723685935	-0.194726743974058	0.845606874005591	0.994731562947848
ENSSSCG00000004307	10.8212320204476	0.406085158276804	0.322984194169547	1.25729111704963	0.208648239381804	0.994731562947848
ENSSSCG00000004308	0.815466635689196	-0.50256743393256	1.08153076938178	-0.464681586655028	0.642159496474752	0.994731562947848
ENSSSCG00000004311	29.3900836567725	-0.122523130556975	0.214562433366532	-0.571037197120484	0.567974428604252	0.994731562947848
ENSSSCG00000004314	25.1657817338731	0.338066081705326	0.236008371845349	1.43243258305622	0.152020059208105	0.994731562947848
ENSSSCG00000004317	53.2792013543745	-0.222038842800477	0.179744491716574	-1.23530262696781	0.216717896429874	0.994731562947848
ENSSSCG00000004318	4.22563350677272	-0.696024779034219	0.665547845043492	-1.04579225102702	0.295656959610706	0.994731562947848
ENSSSCG00000004324	7.22985808618587	-0.244826895740433	0.384169875574964	-0.637288114727931	0.523937191232359	0.994731562947848
ENSSSCG00000004328	78.7806876395625	0.101899244115963	0.264105434037796	0.385827896677735	0.699624133428914	0.994731562947848
ENSSSCG00000004330	0.245089205530997	-1.46027555872844	1.96928269387546	-0.74152662960475	0.458374191605468	0.994731562947848
ENSSSCG00000004331	18.4514717765495	-0.119009863925495	0.273516772102751	-0.435109931323651	0.663482635052886	0.994731562947848
ENSSSCG00000004332	6.93803592412662	0.734597100664436	0.52694051701321	1.39407974324742	0.163293525475431	0.994731562947848
ENSSSCG00000004334	28.4358890850094	0.0152421190392196	0.211550544401173	0.0720495382432831	0.942562484441785	0.994731562947848
ENSSSCG00000004336	3.18442929687658	0.224596916709798	0.533892517189965	0.420678150523477	0.673990118134061	0.994731562947848
ENSSSCG00000004339	53.9178748953614	-0.0840676189273464	0.1671575259556	-0.502924522523001	0.615017339272984	0.994731562947848
ENSSSCG00000004340	0.819381312984938	0.579211566790038	1.19370322356952	0.485222419906035	0.627518580090597	0.994731562947848
ENSSSCG00000004342	2.60423632346549	0.187364694637381	0.564809743538681	0.331730634573497	0.740092666285984	0.994731562947848
ENSSSCG00000004344	1.37679736157159	-0.242298539684627	0.837085312042917	-0.289455012767211	0.772233201645284	0.994731562947848
ENSSSCG00000004347	6.20374324836309	-0.593195651466581	0.494130216922878	-1.20048446978333	0.229951240581328	0.994731562947848
ENSSSCG00000004349	8.86050565828423	-0.247724964310497	0.321664214396596	-0.770135293959261	0.441219641908335	0.994731562947848
ENSSSCG00000004351	3.08548639005654	-0.0427799570419508	0.540628467185662	-0.0791300488941129	0.936929182882545	0.994731562947848
ENSSSCG00000004353	42.760952261252	0.281725668318133	0.269241308204355	1.04636866533237	0.29539085402509	0.994731562947848
ENSSSCG00000004358	17.9788777397585	0.205084820009922	0.255080186583357	0.804001372105404	0.421396182581682	0.994731562947848
ENSSSCG00000004361	0.150924547066291	0.555588859531959	2.23343811634763	0.248759459895186	0.803546851780438	0.994731562947848
ENSSSCG00000004364	3.46249626251647	-1.19849250434444	0.682319555141201	-1.75649737035079	0.0790035200415639	0.994731562947848
ENSSSCG00000004366	0.363846791866253	-0.520780420119901	1.85357477133782	-0.280960028250723	0.778741058232071	0.994731562947848
ENSSSCG00000004367	0.0679250454452981	-0.157691905206694	3.06038250977364	-0.0515268613328854	0.958905698028026	0.994731562947848
ENSSSCG00000004368	75.0873382298772	-0.203130842062235	0.194507312386418	-1.04433524668052	0.296330311005487	0.994731562947848
ENSSSCG00000004369	5.81644394685642	0.0896255733206223	0.444663486719373	0.201558202994943	0.840262123691358	0.994731562947848
ENSSSCG00000004370	14.1438170976671	0.291698091699437	0.274469994857897	1.06276859825956	0.287886903270558	0.994731562947848
ENSSSCG00000004371	3.44905921816363	0.327125820737559	0.54357682502753	0.601802368452685	0.547305698386564	0.994731562947848
ENSSSCG00000004373	3.66753529019094	0.390264004253776	0.514010552494908	0.75925290319335	0.447701284878247	0.994731562947848
ENSSSCG00000004374	3.20041555246611	0.554477242238212	0.51652836634349	1.07346910328152	0.283060694053006	0.994731562947848
ENSSSCG00000004379	0.189362920403426	-0.157686365555786	2.09122815300359	-0.0754037120862705	0.93989350580256	0.994731562947848
ENSSSCG00000004382	218.285348832017	-0.0156523337731374	0.160221141349815	-0.0976920626159015	0.922176818523118	0.994731562947848
ENSSSCG00000004383	42.509538074088	-0.197038330701846	0.165030916025826	-1.19394799136309	0.232498312978264	0.994731562947848
ENSSSCG00000004384	0.0579386110002768	0.563647170019878	3.06038250977364	0.184175399061984	0.853875858043919	0.994731562947848
ENSSSCG00000004385	50.948818985213	0.219339748179819	0.301596466857665	0.727262326595271	0.467065271849544	0.994731562947848
ENSSSCG00000004387	120.272072160242	0.182283749521065	0.185762341163698	0.981273967474562	0.326457656693926	0.994731562947848
ENSSSCG00000004388	3.81423729485256	0.723158894180334	0.489466050843985	1.47744443753227	0.139556541808876	0.994731562947848
ENSSSCG00000004389	1.82834135072237	0.0980786846283336	0.712958103999469	0.137565845844438	0.89058354990024	0.994731562947848
ENSSSCG00000004391	0.608558493935344	2.29714825356056	1.1837544579984	1.94056143826042	0.0523114952481906	0.994731562947848
ENSSSCG00000004392	117.291995413714	0.230286588638885	0.264888566007037	0.869371570507001	0.384643927802499	0.994731562947848
ENSSSCG00000004393	8.57864358277262	0.101564542578721	0.404511859994642	0.251079270160499	0.801752822665148	0.994731562947848
ENSSSCG00000004394	20.6247318165595	0.189817931263561	0.297099591156009	0.638903374201839	0.522885792817154	0.994731562947848
ENSSSCG00000004396	0.533461004047913	2.02691644225267	1.40755512569894	1.44002633022716	0.14985994986384	0.994731562947848
ENSSSCG00000004399	0.0488244180679678	-0.157691905206694	3.06038250977364	-0.0515268613328854	0.958905698028026	0.994731562947848
ENSSSCG00000004401	53.0003697956234	0.246501396882157	0.262782884689403	0.938042053893694	0.348222798751044	0.994731562947848
ENSSSCG00000004402	3.2639345658056	0.464096035918435	0.550090299128041	0.843672460056254	0.398852461009406	0.994731562947848
ENSSSCG00000004403	45.8391634863488	0.197592438146446	0.160951810532527	1.22764967658761	0.219578505019462	0.994731562947848
ENSSSCG00000004405	4.67279822987367	-0.108014166871085	0.441397551681232	-0.244709483456968	0.80668138452805	0.994731562947848
ENSSSCG00000004411	9.89197660683071	0.0265307207710152	0.348139483907794	0.0762071583297974	0.939254287729432	0.994731562947848
ENSSSCG00000004414	135.516178946308	0.053665724961573	0.140807178122757	0.381129184442476	0.703107392763515	0.994731562947848
ENSSSCG00000004415	0.447089248016755	1.2698786896247	1.46543844232519	0.866552052237553	0.386187494470202	0.994731562947848
ENSSSCG00000004419	19.8357888799463	0.615695258953441	0.332263678431779	1.85303209143835	0.0638777590805519	0.994731562947848
ENSSSCG00000004420	5.16014369246561	-0.258269717390227	0.448465884119441	-0.5758960191528	0.564685466516343	0.994731562947848
ENSSSCG00000004421	29.2904249346542	0.0424126761423857	0.216129963567613	0.196236909692152	0.844424739892337	0.994731562947848
ENSSSCG00000004422	0.3532145187651	1.3721797780271	1.65282630435955	0.830202045071397	0.406424559181135	0.994731562947848
ENSSSCG00000004423	0.0700083978008061	0.563647170019878	3.06038250977364	0.184175399061984	0.853875858043919	0.994731562947848
ENSSSCG00000004425	1.80282216258269	1.12523882044543	0.782669086036009	1.4376942190785	0.150520834075887	0.994731562947848
ENSSSCG00000004427	0.231071722317982	-0.537534319183803	2.31427844884723	-0.232268644877869	0.816329364299266	0.994731562947848
ENSSSCG00000004432	37.5271258729017	0.0488289473724383	0.202685757437675	0.240909612938407	0.809625171490471	0.994731562947848
ENSSSCG00000004434	0.798411212052586	0.468173645053827	1.05434910740294	0.444040443309166	0.657013344050566	0.994731562947848
ENSSSCG00000004435	4.99843814943018	0.843924561951418	0.633982958514904	1.33114707677364	0.183140621327944	0.994731562947848
ENSSSCG00000004436	0.079655737736168	0.563647170019878	3.06038250977364	0.184175399061984	0.853875858043919	0.994731562947848
ENSSSCG00000004438	0.0488244180679678	-0.157691905206694	3.06038250977364	-0.0515268613328854	0.958905698028026	0.994731562947848
ENSSSCG00000004439	0.299432543326152	-0.164076687198654	1.70377005221354	-0.0963021312562015	0.923280618458654	0.994731562947848
ENSSSCG00000004441	28.840783590871	-0.0446925216057979	0.273732929345449	-0.163270534212551	0.870305432862539	0.994731562947848
ENSSSCG00000004445	0.0703561851761459	0.563647170019878	3.06038250977364	0.184175399061984	0.853875858043919	0.994731562947848
ENSSSCG00000004446	233.530652521533	0.195587978753531	0.140810564237938	1.38901494935445	0.164828204238382	0.994731562947848
ENSSSCG00000004450	0.0808446267988119	-0.518360598299771	3.06038250977364	-0.169377715577819	0.865499550639651	0.994731562947848
ENSSSCG00000004452	4.73925398084222	-0.380806918668714	0.641879082434605	-0.593268933494979	0.553001186152362	0.994731562947848
ENSSSCG00000004453	0.0488244180679678	-0.157691905206694	3.06038250977364	-0.0515268613328854	0.958905698028026	0.994731562947848
ENSSSCG00000004454	8.12277330424949	0.762564693336618	0.381100155802486	2.00095613115371	0.0453971176746249	0.994731562947848
ENSSSCG00000004456	1.74477527632199	-1.28244731889354	0.770368716962877	-1.66471884262058	0.0959688619373569	0.994731562947848
ENSSSCG00000004457	16.9410353804492	-0.105835942795596	0.279875715237308	-0.378153362487551	0.705316668788827	0.994731562947848
ENSSSCG00000004458	0.0808446267988119	-0.518360598299771	3.06038250977364	-0.169377715577819	0.865499550639651	0.994731562947848
ENSSSCG00000004460	104.23741279867	0.225189066578689	0.187653351137856	1.20002688581489	0.2301288989112	0.994731562947848
ENSSSCG00000004463	3.78068664359051	0.542489402780629	0.482020316929139	1.12544924711209	0.260398712436218	0.994731562947848
ENSSSCG00000004464	58.4363631347274	0.255408423881422	0.236023324178981	1.08213213575342	0.279193818244572	0.994731562947848
ENSSSCG00000004465	64.8286865661208	-0.0265918148422673	0.183461435667155	-0.144944983917555	0.884754309401473	0.994731562947848
ENSSSCG00000004466	0.906898993061686	0.717521546916583	1.21036730654461	0.592813060165171	0.553306266389685	0.994731562947848
ENSSSCG00000004469	0.349441972485071	-0.858899886783369	1.52915537148092	-0.561682548943055	0.574332326281809	0.994731562947848
ENSSSCG00000004470	61.4473294290807	-0.0982974160087785	0.173684617547356	-0.565953493158236	0.571425395882144	0.994731562947848
ENSSSCG00000004472	1.02341899908455	-0.0678737982328691	0.99387419586119	-0.0682921425221797	0.945553078886667	0.994731562947848
ENSSSCG00000004473	40.1043781511511	0.407799490831717	0.182731512552232	2.2316867251627	0.0256356752209258	0.994731562947848
ENSSSCG00000004475	0.135850090890596	-0.518360598299771	3.06038250977364	-0.169377715577819	0.865499550639651	0.994731562947848
ENSSSCG00000004478	11.1236232654491	-0.0250739594013925	0.341621152876834	-0.0733969755392532	0.941490224275992	0.994731562947848
ENSSSCG00000004479	6.2439871033262	0.389407298251456	0.384690665749636	1.01226084467797	0.31141335106453	0.994731562947848
ENSSSCG00000004480	93.893062996071	0.0247145017590913	0.158880588068354	0.155553941860151	0.876384631960389	0.994731562947848
ENSSSCG00000004484	0.994991837454312	-0.0665939658528515	1.02916415484466	-0.0647068453942636	0.948407412410921	0.994731562947848
ENSSSCG00000004485	1.2252797304656	0.289356682004469	0.879127523394713	0.329140738179974	0.742049313492156	0.994731562947848
ENSSSCG00000004486	5.68525657646382	-0.295291104427385	0.466733232308577	-0.632676406963359	0.526944979816106	0.994731562947848
ENSSSCG00000004487	7.25365808059574	0.080547451567808	0.389827263403834	0.206623443584977	0.836303950007842	0.994731562947848
ENSSSCG00000004489	483.860650396581	-0.0452713746783445	0.16206206450805	-0.279345908715706	0.779979377873719	0.994731562947848
ENSSSCG00000004490	1.16042865329771	-1.40931702616083	1.04815265046764	-1.34457230588699	0.178763391746362	0.994731562947848
ENSSSCG00000004492	0.108347358844704	-0.518360068314995	2.84166932255693	-0.18241392979834	0.855257894805258	0.994731562947848
ENSSSCG00000004497	7.61996533569214	0.167106636754198	0.370666802606687	0.450827092091962	0.65211417361426	0.994731562947848
ENSSSCG00000004498	3.56567792360686	-0.464814618021091	0.48893129557047	-0.95067471080729	0.341769529710978	0.994731562947848
ENSSSCG00000004499	210.024811823598	-0.0906652791753976	0.125919860109608	-0.720023665023747	0.471510425067857	0.994731562947848
ENSSSCG00000004500	8.27275286784484	-0.424841863590865	0.344433362721792	-1.2334515455578	0.217407343976492	0.994731562947848
ENSSSCG00000004502	0.10094398972121	-0.518360598299771	3.06038250977364	-0.169377715577819	0.865499550639651	0.994731562947848
ENSSSCG00000004503	0.0404223133994059	-0.157691905206694	3.06038250977364	-0.0515268613328854	0.958905698028026	0.994731562947848
ENSSSCG00000004505	24.0424976571094	-0.166905305835144	0.212761649100707	-0.784470822352677	0.432763896036619	0.994731562947848
ENSSSCG00000004506	4.67935664691024	-0.0706428399026362	0.479562746833145	-0.147306771364405	0.882889888010309	0.994731562947848
ENSSSCG00000004507	6.99247439438575	-0.390698716263842	0.373805659958721	-1.04519208271749	0.295934201908474	0.994731562947848
ENSSSCG00000004508	25.0608535541421	-0.261186429674616	0.204951277030553	-1.27438303122005	0.202527703065722	0.994731562947848
ENSSSCG00000004509	56.0428775086869	-0.617799204969282	0.581557548371291	-1.06231826360003	0.288091225922458	0.994731562947848
ENSSSCG00000004510	486.52079139843	-0.180217043512449	0.19931516719038	-0.904181282603102	0.365899283460724	0.994731562947848
ENSSSCG00000004511	27.1135565637951	0.0601514394367858	0.252296408931414	0.238415757447969	0.811558647075142	0.994731562947848
ENSSSCG00000004516	37.0704390801051	-0.156905013477556	0.204360003126995	-0.767787292408932	0.442613565335464	0.994731562947848
ENSSSCG00000004517	16.6753990140091	-0.353092338043405	0.262073850124315	-1.34730091489828	0.17788333758008	0.994731562947848
ENSSSCG00000004518	1.56231285009068	-0.274193366266192	0.817307930280054	-0.335483550455994	0.737260351320625	0.994731562947848
ENSSSCG00000004521	0.0684770495784786	-0.157691905206694	3.06038250977364	-0.0515268613328854	0.958905698028026	0.994731562947848
ENSSSCG00000004524	44.2100605283496	0.113687824886569	0.162877278001401	0.69799683713766	0.485179172063132	0.994731562947848
ENSSSCG00000004528	12.4264826339019	0.323885120229661	0.280630238884205	1.15413478432488	0.248444914481991	0.994731562947848
ENSSSCG00000004529	3.2742324320181	-0.245425081849282	0.525362827198809	-0.467153496865905	0.640390061828546	0.994731562947848
ENSSSCG00000004530	0.228428603725455	0.893547582048586	1.7843257681292	0.500776034291898	0.616528753971993	0.994731562947848
ENSSSCG00000004531	2.43650984258913	0.322102645550631	0.582056643184213	0.553387113303147	0.579998361222102	0.994731562947848
ENSSSCG00000004534	0.84007566260803	-0.335208651977984	1.24929843153659	-0.268317516068351	0.788454924529901	0.994731562947848
ENSSSCG00000004535	134.073847962995	-0.124949820026607	0.177301458106662	-0.704730921904987	0.480977704222091	0.994731562947848
ENSSSCG00000004537	96.4727462311929	0.0984556613833711	0.178703046170761	0.55094562456026	0.581670950044201	0.994731562947848
ENSSSCG00000004538	17.0126622321143	-0.197729106485769	0.261153374146485	-0.757137858670204	0.448967274737585	0.994731562947848
ENSSSCG00000004540	31.4409395865417	0.382335251311885	0.184901393443581	2.06777917781646	0.0386607925395631	0.994731562947848
ENSSSCG00000004541	18.7896529493038	-0.1515387526085	0.255747595441433	-0.592532462903265	0.553494089112408	0.994731562947848
ENSSSCG00000004542	204.598822843992	0.14234416280038	0.189057229879946	0.752915732927912	0.451500553275063	0.994731562947848
ENSSSCG00000004543	7.48270846321737	-0.256147125718391	0.349086630728517	-0.733763780021685	0.463092719006877	0.994731562947848
ENSSSCG00000004544	21.7266872354485	-0.0599772640638757	0.318719318246118	-0.188182079435677	0.85073392006065	0.994731562947848
ENSSSCG00000004547	9.64471889827539	-0.314446860806766	0.347736387149674	-0.904267923711477	0.365853351004415	0.994731562947848
ENSSSCG00000004549	13.384341046724	0.506547538039327	0.29370529089214	1.72467964911586	0.0845852205526817	0.994731562947848
ENSSSCG00000004550	38.8721233527564	-0.167226553216736	0.2195641399963	-0.761629623214218	0.446281089453248	0.994731562947848
ENSSSCG00000004551	24.1886177754229	-0.141624241363738	0.224358061684334	-0.631242043635588	0.527882275428247	0.994731562947848
ENSSSCG00000004552	8.0106562945687	0.0887028497223406	0.378756240215553	0.234195084606023	0.814833530840961	0.994731562947848
ENSSSCG00000004554	8.97603400135936	-0.238250258715071	0.408900262266616	-0.582661056254653	0.560121494437863	0.994731562947848
ENSSSCG00000004556	105.84908051856	0.289100250890003	0.250461809815089	1.15426879292871	0.248389986562623	0.994731562947848
ENSSSCG00000004558	6.70996736320968	-0.0383532564630845	0.370584079978327	-0.103494074719366	0.917570851932335	0.994731562947848
ENSSSCG00000004561	43.4025295628732	0.104253134800393	0.15956527317391	0.653357292139423	0.513525965060087	0.994731562947848
ENSSSCG00000004569	113.785501677063	0.0902336166777417	0.168311293637538	0.536111479673264	0.591881506729569	0.994731562947848
ENSSSCG00000004570	59.0056820399866	0.0890667830613392	0.178881630011748	0.497909053352709	0.618548145900825	0.994731562947848
ENSSSCG00000004572	0.113193779166129	0.202980470109747	2.80126057570044	0.0724604029594759	0.942235516459501	0.994731562947848
ENSSSCG00000004573	2.46962556808405	-0.329358200312642	0.592000792322941	-0.556347566732604	0.577973275656408	0.994731562947848
ENSSSCG00000004575	438.005785372526	-0.203957478989386	0.154667772357937	-1.31868116983919	0.187275724562458	0.994731562947848
ENSSSCG00000004576	227.582261263538	0.204231744062143	0.251643744628519	0.811590784279709	0.417026481071384	0.994731562947848
ENSSSCG00000004578	70.0960986618415	0.204335217776401	0.217318242382861	0.940258008420724	0.347085233218646	0.994731562947848
ENSSSCG00000004582	23.8327145901991	0.146126728165869	0.23321092817061	0.626586109459535	0.530930575910621	0.994731562947848
ENSSSCG00000004583	14.2657449693661	0.0876207303970241	0.263698793379894	0.33227581087485	0.739681003391375	0.994731562947848
ENSSSCG00000004584	1.16760600332092	-0.766392495502061	0.828387100527063	-0.925162276204497	0.354881502927651	0.994731562947848
ENSSSCG00000004586	18.0750981419374	-0.32054104855335	0.398818458615925	-0.803726712313586	0.421554823481806	0.994731562947848
ENSSSCG00000004587	3.35678395704779	-1.4177703602754	0.577667168983631	-2.45430316348058	0.0141157920457754	0.994731562947848
ENSSSCG00000004588	2.95175961093108	-0.987703692619448	0.661239934420829	-1.49371452207369	0.135250251219453	0.994731562947848
ENSSSCG00000004589	14.6125865959091	-0.319009995599916	0.29257440059346	-1.09035511976726	0.275556743537107	0.994731562947848
ENSSSCG00000004592	92.1395135984262	0.177292107783899	0.178832450900387	0.991386668869478	0.321496807269487	0.994731562947848
ENSSSCG00000004594	0.249448790903054	0.211420048244895	1.75303883977926	0.120602033136651	0.904006258389504	0.994731562947848
ENSSSCG00000004595	24.5117474515939	0.109108155858512	0.224225454515613	0.486600221612728	0.626541666481972	0.994731562947848
ENSSSCG00000004596	154.49400078074	-0.158904386042331	0.140125598491942	-1.13401396855742	0.256788688698892	0.994731562947848
ENSSSCG00000004597	648.139720649652	-0.116101318991925	0.126846876004592	-0.915287176546009	0.360040889309288	0.994731562947848
ENSSSCG00000004598	3.16492878691038	0.0568773562894616	0.531826118249013	0.106947279078216	0.914830804968836	0.994731562947848
ENSSSCG00000004601	7.95824425776333	0.282422192049312	0.450402424335107	0.627044120524506	0.530630314521908	0.994731562947848
ENSSSCG00000004602	1.65474047175348	0.243435825288659	0.770394885462294	0.315988371525312	0.752011334463323	0.994731562947848
ENSSSCG00000004603	6.81481669619792	0.461976342616539	0.418775939340965	1.10315875201321	0.269958230436473	0.994731562947848
ENSSSCG00000004607	0.853361643536419	0.368872145678532	1.04351300801859	0.353490701930917	0.723720598211723	0.994731562947848
ENSSSCG00000004608	0.848921804408894	1.24375036538717	1.09874312213878	1.13197556401183	0.257644707912427	0.994731562947848
ENSSSCG00000004610	273.66462878175	0.115780677961319	0.132981954570775	0.870649542902447	0.38394553654865	0.994731562947848
ENSSSCG00000004612	5.91732863813242	-0.259377147791041	0.393854434357174	-0.658560943243868	0.51017775016322	0.994731562947848
ENSSSCG00000004614	0.313032652602084	0.604514671936637	1.69725262325714	0.356172477598845	0.721711401905102	0.994731562947848
ENSSSCG00000004616	86.3838486500588	-0.0837648874164552	0.22314839641694	-0.375377501077558	0.707379735135011	0.994731562947848
ENSSSCG00000004617	28.0984941018833	0.301900246098578	0.276987733005092	1.0899408534205	0.275739199062892	0.994731562947848
ENSSSCG00000004620	60.289107542759	-0.0303619638323724	0.206864744409897	-0.14677205591017	0.883311941933221	0.994731562947848
ENSSSCG00000004621	1.37766332461931	0.328979542594528	0.969709574507508	0.339255743413288	0.73441707932187	0.994731562947848
ENSSSCG00000004622	8.83144852059394	-0.073725606543558	0.378616779312341	-0.194723558415613	0.845609367979323	0.994731562947848
ENSSSCG00000004624	77.1945956423053	-0.0635091121647217	0.156752899880434	-0.405154304725236	0.685364091338137	0.994731562947848
ENSSSCG00000004625	27.697200354544	-0.0341595536334622	0.246131919852922	-0.138785549041646	0.889619613659586	0.994731562947848
[truncated: 23,881 more rows]
