# Supplementary material for: 3′quant mRNA-Seq of Porcine Liver Reveals Alterations in UPR, Acute Phase Response, and Cholesterol and Bile Acid Metabolism in Response to Different Dietary Fats
Source: Genes (Basel). 2020 Sep 18;11(9):1087. doi: 10.3390/genes11091087 (PMC7565913; doi:10.3390/genes11091087)
Supplement: Supplementary file 1 [file genes-11-01087-s001.zip › Supplementary table 4.xlsx]

## Sheet: RvsB
Upregulated genes
#term ID	REACTOME pathways; term description	observed gene count	background gene count	false discovery rate	matching proteins in your network (IDs)	matching proteins in your network (labels)
SSC-3371453	Regulation of HSF1-mediated heat shock response	5	61	0.0012	ENSSSCP00000009963,ENSSSCP00000011385,ENSSSCP00000012792,ENSSSCP00000015252,ENSSSCP00000016063	BAG3,ENSSSCG00000015140,HSPA13,HSPA9,HSPH1
SSC-6791226	Major pathway of rRNA processing in the nucleolus and cytosol	5	94	0.0028	ENSSSCP00000001066,ENSSSCP00000002971,ENSSSCP00000012201,ENSSSCP00000022063,ENSSSCP00000023124	GNL3,NOB1,NOP58,RPP40,UTP3
SSC-70635	Urea cycle	2	8	0.0206	ENSSSCP00000010003,ENSSSCP00000017119	ENSSSCG00000016159,SLC25A15
SSC-2262752	Cellular responses to stress	6	279	0.0245	ENSSSCP00000008461,ENSSSCP00000009963,ENSSSCP00000011385,ENSSSCP00000012792,ENSSSCP00000015252,ENSSSCP00000016063	BAG3,ENSSSCG00000015140,HSPA13,HSPA9,HSPH1,UBN1
SSC-8953854	Metabolism of RNA	7	409	0.0299	ENSSSCP00000001066,ENSSSCP00000002971,ENSSSCP00000007842,ENSSSCP00000012201,ENSSSCP00000016063,ENSSSCP00000022063,ENSSSCP00000023124	ENSSSCG00000015140,GNL3,NOB1,NOP58,RPP40,SRSF6,UTP3
SSC-351202	Metabolism of polyamines	3	65	0.0467	ENSSSCP00000004741,ENSSSCP00000010003,ENSSSCP00000017119	AMD1,ENSSSCG00000016159,SLC25A15
Downregulated genes
#term ID	CELLULAR COMPONENTS; term description	observed gene count	background gene count	false discovery rate	matching proteins in your network (IDs)	matching proteins in your network (labels)
GO:0005737	cytoplasm	10	737	0.0016	ENSSSCP00000006551,ENSSSCP00000006650,ENSSSCP00000007165,ENSSSCP00000008769,ENSSSCP00000009448,ENSSSCP00000011056,ENSSSCP00000013022,ENSSSCP00000014135,ENSSSCP00000014973,ENSSSCP00000029051	ANPEP,CA3,CAT,CYP7A1,FABP1,GLUD1,HMGCR,HSD3B1,MSMO1,OTC
GO:0005789	endoplasmic reticulum membrane	4	91	0.0016	ENSSSCP00000006650,ENSSSCP00000007165,ENSSSCP00000009448,ENSSSCP00000014973	CYP7A1,HMGCR,HSD3B1,MSMO1
GO:0031090	organelle membrane	6	230	0.0016	ENSSSCP00000006650,ENSSSCP00000007165,ENSSSCP00000009448,ENSSSCP00000011056,ENSSSCP00000013022,ENSSSCP00000014973	CYP7A1,GLUD1,HMGCR,HSD3B1,MSMO1,OTC
GO:0044444	cytoplasmic part	8	544	0.0016	ENSSSCP00000006551,ENSSSCP00000006650,ENSSSCP00000007165,ENSSSCP00000009448,ENSSSCP00000011056,ENSSSCP00000013022,ENSSSCP00000014135,ENSSSCP00000014973	CA3,CAT,CYP7A1,GLUD1,HMGCR,HSD3B1,MSMO1,OTC
GO:0098827	endoplasmic reticulum subcompartment	4	91	0.0016	ENSSSCP00000006650,ENSSSCP00000007165,ENSSSCP00000009448,ENSSSCP00000014973	CYP7A1,HMGCR,HSD3B1,MSMO1
GO:0005777	peroxisome	2	10	0.0018	ENSSSCP00000014135,ENSSSCP00000014973	CAT,HMGCR
GO:0005739	mitochondrion	4	145	0.0021	ENSSSCP00000007165,ENSSSCP00000011056,ENSSSCP00000013022,ENSSSCP00000014135	CAT,GLUD1,HSD3B1,OTC
GO:0016020	membrane	7	537	0.0021	ENSSSCP00000006650,ENSSSCP00000007165,ENSSSCP00000009448,ENSSSCP00000011056,ENSSSCP00000013022,ENSSSCP00000014973,ENSSSCP00000029051	ANPEP,CYP7A1,GLUD1,HMGCR,HSD3B1,MSMO1,OTC
GO:0043231	intracellular membrane-bounded organelle	7	552	0.0022	ENSSSCP00000006650,ENSSSCP00000007165,ENSSSCP00000009448,ENSSSCP00000011056,ENSSSCP00000013022,ENSSSCP00000014135,ENSSSCP00000014973	CAT,CYP7A1,GLUD1,HMGCR,HSD3B1,MSMO1,OTC
GO:0031966	mitochondrial membrane	3	75	0.0031	ENSSSCP00000007165,ENSSSCP00000011056,ENSSSCP00000013022	GLUD1,HSD3B1,OTC
GO:0044446	intracellular organelle part	6	429	0.0031	ENSSSCP00000006650,ENSSSCP00000007165,ENSSSCP00000009448,ENSSSCP00000011056,ENSSSCP00000013022,ENSSSCP00000014973	CYP7A1,GLUD1,HMGCR,HSD3B1,MSMO1,OTC
GO:0044425	membrane part	5	444	0.0123	ENSSSCP00000006650,ENSSSCP00000007165,ENSSSCP00000009448,ENSSSCP00000014973,ENSSSCP00000029051	ANPEP,CYP7A1,HMGCR,HSD3B1,MSMO1
GO:0016021	integral component of membrane	4	328	0.0200	ENSSSCP00000007165,ENSSSCP00000009448,ENSSSCP00000014973,ENSSSCP00000029051	ANPEP,HMGCR,HSD3B1,MSMO1
#term ID	MOLECULAR FUNCTION; term description	observed gene count	background gene count	false discovery rate	matching proteins in your network (IDs)	matching proteins in your network (labels)
GO:0016491	oxidoreductase activity	6	122	9.93e-05	ENSSSCP00000006650,ENSSSCP00000007165,ENSSSCP00000009448,ENSSSCP00000011056,ENSSSCP00000014135,ENSSSCP00000014973	CAT,CYP7A1,GLUD1,HMGCR,HSD3B1,MSMO1
GO:0003824	catalytic activity	9	453	0.00016	ENSSSCP00000006551,ENSSSCP00000006650,ENSSSCP00000007165,ENSSSCP00000009448,ENSSSCP00000011056,ENSSSCP00000013022,ENSSSCP00000014135,ENSSSCP00000014973,ENSSSCP00000029051	ANPEP,CA3,CAT,CYP7A1,GLUD1,HMGCR,HSD3B1,MSMO1,OTC
GO:0046914	transition metal ion binding	4	88	0.0028	ENSSSCP00000006551,ENSSSCP00000006650,ENSSSCP00000009448,ENSSSCP00000029051	ANPEP,CA3,CYP7A1,MSMO1
GO:0016709	oxidoreductase activity, acting on paired donors, with incorporation or reduction of molecular oxygen, NAD(P)H as one donor, and incorporation of one atom of oxygen	2	7	0.0037	ENSSSCP00000006650,ENSSSCP00000009448	CYP7A1,MSMO1
GO:0043167	ion binding	7	436	0.0037	ENSSSCP00000006551,ENSSSCP00000006650,ENSSSCP00000008769,ENSSSCP00000009448,ENSSSCP00000013022,ENSSSCP00000014135,ENSSSCP00000029051	ANPEP,CA3,CAT,CYP7A1,FABP1,MSMO1,OTC
GO:0005488	binding	9	834	0.0055	ENSSSCP00000006551,ENSSSCP00000006650,ENSSSCP00000008769,ENSSSCP00000009448,ENSSSCP00000013022,ENSSSCP00000014135,ENSSSCP00000014973,ENSSSCP00000022931,ENSSSCP00000029051	ANPEP,CA3,CAT,CYP7A1,FABP1,HMGCR,MSMO1,OTC,TTR
GO:0031406	carboxylic acid binding	2	14	0.0086	ENSSSCP00000008769,ENSSSCP00000013022	FABP1,OTC
GO:0046872	metal ion binding	5	285	0.0094	ENSSSCP00000006551,ENSSSCP00000006650,ENSSSCP00000009448,ENSSSCP00000014135,ENSSSCP00000029051	ANPEP,CA3,CAT,CYP7A1,MSMO1
GO:0048037	cofactor binding	3	77	0.0094	ENSSSCP00000006650,ENSSSCP00000014135,ENSSSCP00000014973	CAT,CYP7A1,HMGCR
GO:0005506	iron ion binding	2	25	0.0123	ENSSSCP00000006650,ENSSSCP00000009448	CYP7A1,MSMO1
GO:0016616	oxidoreductase activity, acting on the CH-OH group of donors, NAD or NADP as acceptor	2	27	0.0132	ENSSSCP00000007165,ENSSSCP00000014973	HMGCR,HSD3B1
GO:0036094	small molecule binding	4	215	0.0133	ENSSSCP00000008769,ENSSSCP00000013022,ENSSSCP00000014973,ENSSSCP00000022931	FABP1,HMGCR,OTC,TTR
GO:0020037	heme binding	2	31	0.0142	ENSSSCP00000006650,ENSSSCP00000014135	CAT,CYP7A1
GO:0008270	zinc ion binding	2	51	0.0323	ENSSSCP00000006551,ENSSSCP00000029051	ANPEP,CA3
#term ID	KEGG PATHWAYS: term description	observed gene count	background gene count	false discovery rate	matching proteins in your network (IDs)	matching proteins in your network (labels)
ssc01100	Metabolic pathways	21	1082	5.70e-11	ENSSSCP00000001618,ENSSSCP00000005663,ENSSSCP00000006453,ENSSSCP00000006650,ENSSSCP00000007165,ENSSSCP00000008387,ENSSSCP00000009448,ENSSSCP00000009794,ENSSSCP00000010598,ENSSSCP00000010733,ENSSSCP00000011056,ENSSSCP00000011886,ENSSSCP00000013022,ENSSSCP00000014973,ENSSSCP00000015005,ENSSSCP00000017835,ENSSSCP00000017880,ENSSSCP00000022970,ENSSSCP00000023603,ENSSSCP00000026814,ENSSSCP00000029051	ACSM3,ADH4,ALDH1A1,ANPEP,BHMT2,CYP7A1,DPYS,FDFT1,GCLC,GLUD1,HMGCR,HMGCS1,HSD17B6,HSD3B1,LOC733634,MSMO1,MVK,NADK2,NMRK1,OTC,UPB1
ssc00140	Steroid hormone biosynthesis	4	38	0.00023	ENSSSCP00000006650,ENSSSCP00000007165,ENSSSCP00000011886,ENSSSCP00000023603	CYP7A1,HSD17B6,HSD3B1,LOC733634
ssc00900	Terpenoid backbone biosynthesis	3	20	0.00094	ENSSSCP00000010598,ENSSSCP00000014973,ENSSSCP00000017880	HMGCR,HMGCS1,MVK
ssc00830	Retinol metabolism	3	41	0.0051	ENSSSCP00000009794,ENSSSCP00000023603,ENSSSCP00000026814	ADH4,ALDH1A1,HSD17B6
ssc04979	Cholesterol metabolism	3	43	0.0051	ENSSSCP00000004131,ENSSSCP00000006650,ENSSSCP00000016879	ABCB11,ANGPTL3,CYP7A1
ssc04976	Bile secretion	3	56	0.0080	ENSSSCP00000006650,ENSSSCP00000014973,ENSSSCP00000016879	ABCB11,CYP7A1,HMGCR
ssc00910	Nitrogen metabolism	2	14	0.0103	ENSSSCP00000006551,ENSSSCP00000011056	CA3,GLUD1
ssc00100	Steroid biosynthesis	2	18	0.0142	ENSSSCP00000009448,ENSSSCP00000022970	FDFT1,MSMO1
ssc00220	Arginine biosynthesis	2	18	0.0142	ENSSSCP00000011056,ENSSSCP00000013022	GLUD1,OTC
ssc00770	Pantothenate and CoA biosynthesis	2	19	0.0142	ENSSSCP00000006453,ENSSSCP00000010733	DPYS,UPB1
ssc00650	Butanoate metabolism	2	24	0.0175	ENSSSCP00000008387,ENSSSCP00000017880	ACSM3,HMGCS1
ssc00760	Nicotinate and nicotinamide metabolism	2	25	0.0175	ENSSSCP00000005663,ENSSSCP00000017835	NADK2,NMRK1
ssc00410	beta-Alanine metabolism	2	30	0.0224	ENSSSCP00000006453,ENSSSCP00000010733	DPYS,UPB1
ssc00270	Cysteine and methionine metabolism	2	42	0.0388	ENSSSCP00000001618,ENSSSCP00000015005	BHMT2,GCLC
ssc00480	Glutathione metabolism	2	43	0.0388	ENSSSCP00000001618,ENSSSCP00000029051	ANPEP,GCLC
ssc00983	Drug metabolism - other enzymes	2	46	0.0388	ENSSSCP00000006453,ENSSSCP00000010733	DPYS,UPB1
ssc04913	Ovarian steroidogenesis	2	42	0.0388	ENSSSCP00000007165,ENSSSCP00000011886	HSD3B1,LOC733634
#term ID	BIOLOGICAL PROCESSES: term description	observed gene count	background gene count	false discovery rate	matching proteins in your network (IDs)	matching proteins in your network (labels)
GO:0006694	steroid biosynthetic process	4	21	0.00015	ENSSSCP00000006650,ENSSSCP00000007165,ENSSSCP00000009448,ENSSSCP00000014973	CYP7A1,HMGCR,HSD3B1,MSMO1
GO:0055114	oxidation-reduction process	6	142	0.00038	ENSSSCP00000006650,ENSSSCP00000007165,ENSSSCP00000009448,ENSSSCP00000011056,ENSSSCP00000014135,ENSSSCP00000014973	CAT,CYP7A1,GLUD1,HMGCR,HSD3B1,MSMO1
GO:0006629	lipid metabolic process	5	93	0.00043	ENSSSCP00000006650,ENSSSCP00000007165,ENSSSCP00000009448,ENSSSCP00000014973,ENSSSCP00000022931	CYP7A1,HMGCR,HSD3B1,MSMO1,TTR
GO:1901615	organic hydroxy compound metabolic process	4	49	0.00053	ENSSSCP00000006650,ENSSSCP00000009448,ENSSSCP00000014973,ENSSSCP00000022931	CYP7A1,HMGCR,MSMO1,TTR
GO:0016125	sterol metabolic process	3	23	0.0016	ENSSSCP00000006650,ENSSSCP00000009448,ENSSSCP00000014973	CYP7A1,HMGCR,MSMO1
GO:1901617	organic hydroxy compound biosynthetic process	3	25	0.0018	ENSSSCP00000006650,ENSSSCP00000009448,ENSSSCP00000014973	CYP7A1,HMGCR,MSMO1
GO:0008152	metabolic process	9	654	0.0021	ENSSSCP00000006650,ENSSSCP00000007165,ENSSSCP00000009448,ENSSSCP00000011056,ENSSSCP00000013022,ENSSSCP00000014135,ENSSSCP00000014973,ENSSSCP00000022931,ENSSSCP00000029051	ANPEP,CAT,CYP7A1,GLUD1,HMGCR,HSD3B1,MSMO1,OTC,TTR
GO:0006066	alcohol metabolic process	3	30	0.0023	ENSSSCP00000006650,ENSSSCP00000014973,ENSSSCP00000022931	CYP7A1,HMGCR,TTR
GO:0044238	primary metabolic process	8	543	0.0027	ENSSSCP00000006650,ENSSSCP00000007165,ENSSSCP00000009448,ENSSSCP00000011056,ENSSSCP00000013022,ENSSSCP00000014973,ENSSSCP00000022931,ENSSSCP00000029051	ANPEP,CYP7A1,GLUD1,HMGCR,HSD3B1,MSMO1,OTC,TTR
GO:0006720	isoprenoid metabolic process	2	5	0.0030	ENSSSCP00000014973,ENSSSCP00000022931	HMGCR,TTR
GO:0044281	small molecule metabolic process	5	197	0.0042	ENSSSCP00000006650,ENSSSCP00000011056,ENSSSCP00000013022,ENSSSCP00000014973,ENSSSCP00000022931	CYP7A1,GLUD1,HMGCR,OTC,TTR
GO:0071704	organic substance metabolic process	8	593	0.0042	ENSSSCP00000006650,ENSSSCP00000007165,ENSSSCP00000009448,ENSSSCP00000011056,ENSSSCP00000013022,ENSSSCP00000014973,ENSSSCP00000022931,ENSSSCP00000029051	ANPEP,CYP7A1,GLUD1,HMGCR,HSD3B1,MSMO1,OTC,TTR
GO:0009064	glutamine family amino acid metabolic process	2	8	0.0050	ENSSSCP00000011056,ENSSSCP00000013022	GLUD1,OTC
GO:0044283	small molecule biosynthetic process	3	53	0.0071	ENSSSCP00000006650,ENSSSCP00000013022,ENSSSCP00000014973	CYP7A1,HMGCR,OTC
GO:0016126	sterol biosynthetic process	2	11	0.0077	ENSSSCP00000009448,ENSSSCP00000014973	HMGCR,MSMO1
GO:0044237	cellular metabolic process	7	545	0.0101	ENSSSCP00000006650,ENSSSCP00000011056,ENSSSCP00000013022,ENSSSCP00000014135,ENSSSCP00000014973,ENSSSCP00000022931,ENSSSCP00000029051	ANPEP,CAT,CYP7A1,GLUD1,HMGCR,OTC,TTR
GO:1901576	organic substance biosynthetic process	5	272	0.0115	ENSSSCP00000006650,ENSSSCP00000007165,ENSSSCP00000009448,ENSSSCP00000013022,ENSSSCP00000014973	CYP7A1,HMGCR,HSD3B1,MSMO1,OTC
GO:0008203	cholesterol metabolic process	2	22	0.0206	ENSSSCP00000006650,ENSSSCP00000014973	CYP7A1,HMGCR
GO:0019752	carboxylic acid metabolic process	3	109	0.0336	ENSSSCP00000006650,ENSSSCP00000011056,ENSSSCP00000013022	CYP7A1,GLUD1,OTC
GO:0009056	catabolic process	3	124	0.0408	ENSSSCP00000006650,ENSSSCP00000014135,ENSSSCP00000029051	ANPEP,CAT,CYP7A1
GO:0046394	carboxylic acid biosynthetic process	2	37	0.0408	ENSSSCP00000006650,ENSSSCP00000013022	CYP7A1,OTC
GO:0051186	cofactor metabolic process	2	43	0.0474	ENSSSCP00000014135,ENSSSCP00000014973	CAT,HMGCR
#term ID	RAECTOME PATHWAYS; term description	observed gene count	background gene count	false discovery rate	matching proteins in your network (IDs)	matching proteins in your network (labels)
SSC-1430728	Metabolism	20	1350	5.95e-08	ENSSSCP00000001618,ENSSSCP00000005663,ENSSSCP00000006453,ENSSSCP00000006491,ENSSSCP00000006551,ENSSSCP00000007165,ENSSSCP00000007326,ENSSSCP00000009794,ENSSSCP00000010598,ENSSSCP00000010733,ENSSSCP00000011800,ENSSSCP00000011886,ENSSSCP00000014170,ENSSSCP00000015005,ENSSSCP00000016879,ENSSSCP00000017835,ENSSSCP00000017880,ENSSSCP00000022931,ENSSSCP00000022970,ENSSSCP00000026814	ABCB11,ACBD5,ADH4,AGL,ALDH1A1,BHMT2,CA3,DPYS,ENSSSCG00000013337,FDFT1,GCLC,HMGCS1,HRSP12,HSD3B1,LOC733634,MVK,NADK2,NMRK1,TTR,UPB1
SSC-8957322	Metabolism of steroids	6	86	1.84e-05	ENSSSCP00000007165,ENSSSCP00000010598,ENSSSCP00000011886,ENSSSCP00000016879,ENSSSCP00000017880,ENSSSCP00000022970	ABCB11,FDFT1,HMGCS1,HSD3B1,LOC733634,MVK
SSC-191273	Cholesterol biosynthesis	3	20	0.0020	ENSSSCP00000010598,ENSSSCP00000017880,ENSSSCP00000022970	FDFT1,HMGCS1,MVK
SSC-352238	Breakdown of the nuclear lamina	2	2	0.0020	ENSSSCP00000009746,ENSSSCP00000015156	CASP6,LMNB1
SSC-5365859	RA biosynthesis pathway	3	23	0.0020	ENSSSCP00000009794,ENSSSCP00000011886,ENSSSCP00000026814	ADH4,ALDH1A1,LOC733634
SSC-71384	Ethanol oxidation	2	7	0.0068	ENSSSCP00000009794,ENSSSCP00000026814	ADH4,ALDH1A1
SSC-73621	Pyrimidine catabolism	2	7	0.0068	ENSSSCP00000006453,ENSSSCP00000010733	DPYS,UPB1
SSC-556833	Metabolism of lipids	7	496	0.0092	ENSSSCP00000007165,ENSSSCP00000010598,ENSSSCP00000011800,ENSSSCP00000011886,ENSSSCP00000016879,ENSSSCP00000017880,ENSSSCP00000022970	ABCB11,ACBD5,FDFT1,HMGCS1,HSD3B1,LOC733634,MVK
SSC-196854	Metabolism of vitamins and cofactors	4	136	0.0109	ENSSSCP00000005663,ENSSSCP00000011886,ENSSSCP00000017835,ENSSSCP00000022931	LOC733634,NADK2,NMRK1,TTR
SSC-2187338	Visual phototransduction	3	62	0.0126	ENSSSCP00000011886,ENSSSCP00000022931,ENSSSCP00000023603	HSD17B6,LOC733634,TTR
SSC-193368	Synthesis of bile acids and bile salts via 7alpha-hydroxycholesterol	2	17	0.0185	ENSSSCP00000011886,ENSSSCP00000016879	ABCB11,LOC733634
SSC-2453902	The canonical retinoid cycle in rods (twilight vision)	2	18	0.0189	ENSSSCP00000022931,ENSSSCP00000023603	HSD17B6,TTR
SSC-196807	Nicotinate metabolism	2	23	0.0275	ENSSSCP00000005663,ENSSSCP00000017835	NADK2,NMRK1
SSC-975634	Retinoid metabolism and transport	2	29	0.0347	ENSSSCP00000011886,ENSSSCP00000022931	LOC733634,TTR

## Sheet: RvsC
Upregulated genes
#term ID	REACTOME PATHWAYS; term description	observed gene count	background gene count	false discovery rate	matching proteins in your network (IDs)	matching proteins in your network (labels)
SSC-3371453	Regulation of HSF1-mediated heat shock response	3	61	0.0183	ENSSSCP00000011385,ENSSSCP00000015252,ENSSSCP00000016063	BAG3,ENSSSCG00000015140,HSPA9
SSC-9013507	NOTCH3 Activation and Transmission of Signal to the Nucleus	2	13	0.0183	ENSSSCP00000011578,ENSSSCP00000025452	EGFR,PSEN2
SSC-1236394	Signaling by ERBB4	2	32	0.0270	ENSSSCP00000011578,ENSSSCP00000025452	EGFR,PSEN2
SSC-2262752	Cellular responses to stress	4	279	0.0270	ENSSSCP00000011385,ENSSSCP00000011734,ENSSSCP00000015252,ENSSSCP00000016063	BAG3,DNAJA1,ENSSSCG00000015140,HSPA9
SSC-3371497	HSP90 chaperone cycle for steroid hormone receptors (SHR)	2	40	0.0308	ENSSSCP00000011734,ENSSSCP00000016063	DNAJA1,ENSSSCG00000015140
Downregulated genes
#term ID	CELLULAR COMPONENT; term description	observed gene count	background gene count	false discovery rate	matching proteins in your network (IDs)	matching proteins in your network (labels)
GO:0005737	cytoplasm	10	737	1.50e-05	ENSSSCP00000002505,ENSSSCP00000003581,ENSSSCP00000004583,ENSSSCP00000007165,ENSSSCP00000014135,ENSSSCP00000015774,ENSSSCP00000015958,ENSSSCP00000022108,ENSSSCP00000024781,ENSSSCP00000029051	ANPEP,CAT,ERH,FTCD,HSD3B1,MAN1A1,RPS3,SDHD,TMEM86B,UOX
GO:0044444	cytoplasmic part	8	544	4.63e-05	ENSSSCP00000002505,ENSSSCP00000004583,ENSSSCP00000007165,ENSSSCP00000014135,ENSSSCP00000015774,ENSSSCP00000015958,ENSSSCP00000022108,ENSSSCP00000024781	CAT,ERH,FTCD,HSD3B1,MAN1A1,RPS3,SDHD,UOX
GO:0043231	intracellular membrane-bounded organelle	7	552	0.00033	ENSSSCP00000004583,ENSSSCP00000007165,ENSSSCP00000014135,ENSSSCP00000015774,ENSSSCP00000015958,ENSSSCP00000022108,ENSSSCP00000024781	CAT,FTCD,HSD3B1,MAN1A1,RPS3,SDHD,UOX
GO:0044425	membrane part	6	444	0.00076	ENSSSCP00000003581,ENSSSCP00000004583,ENSSSCP00000007165,ENSSSCP00000015774,ENSSSCP00000015958,ENSSSCP00000029051	ANPEP,HSD3B1,MAN1A1,RPS3,SDHD,TMEM86B
GO:0005739	mitochondrion	4	145	0.00079	ENSSSCP00000007165,ENSSSCP00000014135,ENSSSCP00000015774,ENSSSCP00000015958	CAT,HSD3B1,RPS3,SDHD
GO:0005777	peroxisome	2	10	0.0013	ENSSSCP00000014135,ENSSSCP00000024781	CAT,UOX
GO:0016021	integral component of membrane	5	328	0.0013	ENSSSCP00000003581,ENSSSCP00000004583,ENSSSCP00000007165,ENSSSCP00000015958,ENSSSCP00000029051	ANPEP,HSD3B1,MAN1A1,SDHD,TMEM86B
GO:0031966	mitochondrial membrane	3	75	0.0015	ENSSSCP00000007165,ENSSSCP00000015774,ENSSSCP00000015958	HSD3B1,RPS3,SDHD
GO:0005789	endoplasmic reticulum membrane	3	91	0.0023	ENSSSCP00000004583,ENSSSCP00000007165,ENSSSCP00000015774	HSD3B1,MAN1A1,RPS3
GO:0031090	organelle membrane	4	230	0.0023	ENSSSCP00000004583,ENSSSCP00000007165,ENSSSCP00000015774,ENSSSCP00000015958	HSD3B1,MAN1A1,RPS3,SDHD
GO:0098827	endoplasmic reticulum subcompartment	3	91	0.0023	ENSSSCP00000004583,ENSSSCP00000007165,ENSSSCP00000015774	HSD3B1,MAN1A1,RPS3
GO:0044446	intracellular organelle part	5	429	0.0024	ENSSSCP00000004583,ENSSSCP00000007165,ENSSSCP00000015774,ENSSSCP00000015958,ENSSSCP00000022108	FTCD,HSD3B1,MAN1A1,RPS3,SDHD
GO:0012505	endomembrane system	4	254	0.0025	ENSSSCP00000004583,ENSSSCP00000007165,ENSSSCP00000015774,ENSSSCP00000022108	FTCD,HSD3B1,MAN1A1,RPS3
GO:0032991	protein-containing complex	4	301	0.0042	ENSSSCP00000002505,ENSSSCP00000003825,ENSSSCP00000015774,ENSSSCP00000015958	C1QA,ERH,RPS3,SDHD
GO:0015630	microtubule cytoskeleton	2	38	0.0057	ENSSSCP00000015774,ENSSSCP00000022108	FTCD,RPS3
GO:0005743	mitochondrial inner membrane	2	42	0.0067	ENSSSCP00000015774,ENSSSCP00000015958	RPS3,SDHD
GO:1902494	catalytic complex	2	66	0.0148	ENSSSCP00000002505,ENSSSCP00000015958	ERH,SDHD
GO:0044430	cytoskeletal part	2	68	0.0153	ENSSSCP00000015774,ENSSSCP00000022108	FTCD,RPS3
GO:0005794	Golgi apparatus	2	70	0.0157	ENSSSCP00000004583,ENSSSCP00000022108	FTCD,MAN1A1
GO:0098588	bounding membrane of organelle	2	126	0.0450	ENSSSCP00000004583,ENSSSCP00000015774	MAN1A1,RPS3
#term ID	MOLECULAR FUNCTION; term description	observed gene count	background gene count	false discovery rate	matching proteins in your network (IDs)	matching proteins in your network (labels)
GO:0003824	catalytic activity	8	453	4.74e-05	ENSSSCP00000003581,ENSSSCP00000004583,ENSSSCP00000007165,ENSSSCP00000014135,ENSSSCP00000015774,ENSSSCP00000022108,ENSSSCP00000024781,ENSSSCP00000029051	ANPEP,CAT,FTCD,HSD3B1,MAN1A1,RPS3,TMEM86B,UOX
GO:0097159	organic cyclic compound binding	6	356	0.0010	ENSSSCP00000002505,ENSSSCP00000002680,ENSSSCP00000014135,ENSSSCP00000015774,ENSSSCP00000015958,ENSSSCP00000022108	CAT,ERH,FTCD,RPS3,SDHD,SERPINA6
GO:0005488	binding	8	834	0.0013	ENSSSCP00000002505,ENSSSCP00000002680,ENSSSCP00000004583,ENSSSCP00000014135,ENSSSCP00000015774,ENSSSCP00000015958,ENSSSCP00000022108,ENSSSCP00000029051	ANPEP,CAT,ERH,FTCD,MAN1A1,RPS3,SDHD,SERPINA6
GO:0016787	hydrolase activity	4	189	0.0051	ENSSSCP00000003581,ENSSSCP00000004583,ENSSSCP00000015774,ENSSSCP00000029051	ANPEP,MAN1A1,RPS3,TMEM86B
GO:1901363	heterocyclic compound binding	5	340	0.0051	ENSSSCP00000002505,ENSSSCP00000014135,ENSSSCP00000015774,ENSSSCP00000015958,ENSSSCP00000022108	CAT,ERH,FTCD,RPS3,SDHD
GO:0016798	hydrolase activity, acting on glycosyl bonds	2	16	0.0064	ENSSSCP00000004583,ENSSSCP00000015774	MAN1A1,RPS3
GO:0016829	lyase activity	2	18	0.0068	ENSSSCP00000015774,ENSSSCP00000022108	FTCD,RPS3
GO:0043167	ion binding	5	436	0.0078	ENSSSCP00000004583,ENSSSCP00000014135,ENSSSCP00000015958,ENSSSCP00000022108,ENSSSCP00000029051	ANPEP,CAT,FTCD,MAN1A1,SDHD
GO:0016491	oxidoreductase activity	3	122	0.0116	ENSSSCP00000007165,ENSSSCP00000014135,ENSSSCP00000024781	CAT,HSD3B1,UOX
GO:0020037	heme binding	2	31	0.0116	ENSSSCP00000014135,ENSSSCP00000015958	CAT,SDHD
GO:0033218	amide binding	2	28	0.0116	ENSSSCP00000022108,ENSSSCP00000029051	ANPEP,FTCD
GO:0046872	metal ion binding	4	285	0.0116	ENSSSCP00000004583,ENSSSCP00000014135,ENSSSCP00000015958,ENSSSCP00000029051	ANPEP,CAT,MAN1A1,SDHD
GO:0043565	sequence-specific DNA binding	2	46	0.0183	ENSSSCP00000002505,ENSSSCP00000015774	ERH,RPS3
#term ID	KEGG PATHWAYS; term description	observed gene count	background gene count	false discovery rate	matching proteins in your network (IDs)	matching proteins in your network (labels)
ssc01100	Metabolic pathways	8	1082	0.0130	ENSSSCP00000004583,ENSSSCP00000007165,ENSSSCP00000015005,ENSSSCP00000015100,ENSSSCP00000015958,ENSSSCP00000022108,ENSSSCP00000024781,ENSSSCP00000029051	ANPEP,BHMT2,FTCD,HSD3B1,MAN1A1,MAN2A1,SDHD,UOX
#term ID	BIOLOGICAL PROCESSES; term description	observed gene count	background gene count	false discovery rate	matching proteins in your network (IDs)	matching proteins in your network (labels)
GO:0008152	metabolic process	11	654	1.48e-06	ENSSSCP00000002505,ENSSSCP00000003581,ENSSSCP00000003825,ENSSSCP00000004583,ENSSSCP00000007165,ENSSSCP00000014135,ENSSSCP00000015774,ENSSSCP00000015958,ENSSSCP00000022108,ENSSSCP00000024781,ENSSSCP00000029051	ANPEP,C1QA,CAT,ERH,FTCD,HSD3B1,MAN1A1,RPS3,SDHD,TMEM86B,UOX
GO:0044238	primary metabolic process	10	543	1.91e-06	ENSSSCP00000002505,ENSSSCP00000003581,ENSSSCP00000003825,ENSSSCP00000004583,ENSSSCP00000007165,ENSSSCP00000015774,ENSSSCP00000015958,ENSSSCP00000022108,ENSSSCP00000024781,ENSSSCP00000029051	ANPEP,C1QA,ERH,FTCD,HSD3B1,MAN1A1,RPS3,SDHD,TMEM86B,UOX
GO:0071704	organic substance metabolic process	10	593	2.90e-06	ENSSSCP00000002505,ENSSSCP00000003581,ENSSSCP00000003825,ENSSSCP00000004583,ENSSSCP00000007165,ENSSSCP00000015774,ENSSSCP00000015958,ENSSSCP00000022108,ENSSSCP00000024781,ENSSSCP00000029051	ANPEP,C1QA,ERH,FTCD,HSD3B1,MAN1A1,RPS3,SDHD,TMEM86B,UOX
GO:0044237	cellular metabolic process	9	545	1.26e-05	ENSSSCP00000002505,ENSSSCP00000003581,ENSSSCP00000004583,ENSSSCP00000014135,ENSSSCP00000015774,ENSSSCP00000015958,ENSSSCP00000022108,ENSSSCP00000024781,ENSSSCP00000029051	ANPEP,CAT,ERH,FTCD,MAN1A1,RPS3,SDHD,TMEM86B,UOX
GO:1901564	organonitrogen compound metabolic process	8	375	1.26e-05	ENSSSCP00000002505,ENSSSCP00000003825,ENSSSCP00000004583,ENSSSCP00000015774,ENSSSCP00000015958,ENSSSCP00000022108,ENSSSCP00000024781,ENSSSCP00000029051	ANPEP,C1QA,ERH,FTCD,MAN1A1,RPS3,SDHD,UOX
GO:1901360	organic cyclic compound metabolic process	6	248	0.00017	ENSSSCP00000002505,ENSSSCP00000007165,ENSSSCP00000015774,ENSSSCP00000015958,ENSSSCP00000022108,ENSSSCP00000024781	ERH,FTCD,HSD3B1,RPS3,SDHD,UOX
GO:0034641	cellular nitrogen compound metabolic process	6	275	0.00026	ENSSSCP00000002505,ENSSSCP00000015774,ENSSSCP00000015958,ENSSSCP00000022108,ENSSSCP00000024781,ENSSSCP00000029051	ANPEP,ERH,FTCD,RPS3,SDHD,UOX
GO:0044281	small molecule metabolic process	5	197	0.00070	ENSSSCP00000002505,ENSSSCP00000003581,ENSSSCP00000015958,ENSSSCP00000022108,ENSSSCP00000024781	ERH,FTCD,SDHD,TMEM86B,UOX
GO:0016999	antibiotic metabolic process	3	29	0.00071	ENSSSCP00000014135,ENSSSCP00000015958,ENSSSCP00000022108	CAT,FTCD,SDHD
GO:0046483	heterocycle metabolic process	5	208	0.00075	ENSSSCP00000002505,ENSSSCP00000015774,ENSSSCP00000015958,ENSSSCP00000022108,ENSSSCP00000024781	ERH,FTCD,RPS3,SDHD,UOX
GO:0006725	cellular aromatic compound metabolic process	5	224	0.00085	ENSSSCP00000002505,ENSSSCP00000015774,ENSSSCP00000015958,ENSSSCP00000022108,ENSSSCP00000024781	ERH,FTCD,RPS3,SDHD,UOX
GO:0042542	response to hydrogen peroxide	2	3	0.00085	ENSSSCP00000014135,ENSSSCP00000015774	CAT,RPS3
GO:0044248	cellular catabolic process	4	105	0.00085	ENSSSCP00000014135,ENSSSCP00000022108,ENSSSCP00000024781,ENSSSCP00000029051	ANPEP,CAT,FTCD,UOX
GO:0055114	oxidation-reduction process	4	142	0.0021	ENSSSCP00000007165,ENSSSCP00000014135,ENSSSCP00000015958,ENSSSCP00000024781	CAT,HSD3B1,SDHD,UOX
GO:1901565	organonitrogen compound catabolic process	3	50	0.0021	ENSSSCP00000022108,ENSSSCP00000024781,ENSSSCP00000029051	ANPEP,FTCD,UOX
GO:0055086	nucleobase-containing small molecule metabolic process	3	69	0.0045	ENSSSCP00000002505,ENSSSCP00000015958,ENSSSCP00000024781	ERH,SDHD,UOX
GO:0006139	nucleobase-containing compound metabolic process	4	202	0.0062	ENSSSCP00000002505,ENSSSCP00000015774,ENSSSCP00000015958,ENSSSCP00000024781	ERH,RPS3,SDHD,UOX
GO:0043603	cellular amide metabolic process	3	79	0.0062	ENSSSCP00000015774,ENSSSCP00000022108,ENSSSCP00000029051	ANPEP,FTCD,RPS3
GO:0006950	response to stress	4	224	0.0080	ENSSSCP00000002505,ENSSSCP00000003825,ENSSSCP00000014135,ENSSSCP00000015774	C1QA,CAT,ERH,RPS3
GO:0050789	regulation of biological process	6	648	0.0086	ENSSSCP00000002505,ENSSSCP00000002680,ENSSSCP00000003825,ENSSSCP00000014135,ENSSSCP00000015774,ENSSSCP00000029051	ANPEP,C1QA,CAT,ERH,RPS3,SERPINA6
GO:0046700	heterocycle catabolic process	2	21	0.0101	ENSSSCP00000022108,ENSSSCP00000024781	FTCD,UOX
GO:0044270	cellular nitrogen compound catabolic process	2	22	0.0103	ENSSSCP00000022108,ENSSSCP00000024781	FTCD,UOX
GO:0097237	cellular response to toxic substance	2	23	0.0108	ENSSSCP00000014135,ENSSSCP00000015774	CAT,RPS3
GO:0006082	organic acid metabolic process	3	112	0.0113	ENSSSCP00000015958,ENSSSCP00000022108,ENSSSCP00000024781	FTCD,SDHD,UOX
GO:0019439	aromatic compound catabolic process	2	24	0.0113	ENSSSCP00000022108,ENSSSCP00000024781	FTCD,UOX
GO:0019538	protein metabolic process	4	263	0.0113	ENSSSCP00000003825,ENSSSCP00000004583,ENSSSCP00000015774,ENSSSCP00000029051	ANPEP,C1QA,MAN1A1,RPS3
GO:1901576	organic substance biosynthetic process	4	272	0.0113	ENSSSCP00000002505,ENSSSCP00000004583,ENSSSCP00000007165,ENSSSCP00000015774	ERH,HSD3B1,MAN1A1,RPS3
GO:1901361	organic cyclic compound catabolic process	2	27	0.0115	ENSSSCP00000022108,ENSSSCP00000024781	FTCD,UOX
GO:0050896	response to stimulus	5	519	0.0143	ENSSSCP00000002505,ENSSSCP00000003825,ENSSSCP00000014135,ENSSSCP00000015774,ENSSSCP00000029051	ANPEP,C1QA,CAT,ERH,RPS3
GO:1901566	organonitrogen compound biosynthetic process	3	138	0.0154	ENSSSCP00000002505,ENSSSCP00000004583,ENSSSCP00000015774	ERH,MAN1A1,RPS3
GO:0048518	positive regulation of biological process	4	315	0.0159	ENSSSCP00000002505,ENSSSCP00000003825,ENSSSCP00000014135,ENSSSCP00000015774	C1QA,CAT,ERH,RPS3
GO:0048584	positive regulation of response to stimulus	3	141	0.0159	ENSSSCP00000002505,ENSSSCP00000003825,ENSSSCP00000015774	C1QA,ERH,RPS3
GO:1901362	organic cyclic compound biosynthetic process	3	152	0.0188	ENSSSCP00000002505,ENSSSCP00000007165,ENSSSCP00000015774	ERH,HSD3B1,RPS3
GO:0044282	small molecule catabolic process	2	39	0.0190	ENSSSCP00000022108,ENSSSCP00000024781	FTCD,UOX
GO:0050778	positive regulation of immune response	2	43	0.0223	ENSSSCP00000003825,ENSSSCP00000015774	C1QA,RPS3
GO:0051186	cofactor metabolic process	2	43	0.0223	ENSSSCP00000014135,ENSSSCP00000022108	CAT,FTCD
GO:0050794	regulation of cellular process	5	605	0.0233	ENSSSCP00000002505,ENSSSCP00000002680,ENSSSCP00000014135,ENSSSCP00000015774,ENSSSCP00000029051	ANPEP,CAT,ERH,RPS3,SERPINA6
GO:0052548	regulation of endopeptidase activity	2	46	0.0238	ENSSSCP00000002680,ENSSSCP00000015774	RPS3,SERPINA6
GO:0072521	purine-containing compound metabolic process	2	53	0.0294	ENSSSCP00000015958,ENSSSCP00000024781	SDHD,UOX
GO:0007049	cell cycle	2	55	0.0310	ENSSSCP00000002505,ENSSSCP00000015774	ERH,RPS3
GO:0009117	nucleotide metabolic process	2	61	0.0363	ENSSSCP00000002505,ENSSSCP00000015958	ERH,SDHD
GO:0006518	peptide metabolic process	2	67	0.0412	ENSSSCP00000015774,ENSSSCP00000029051	ANPEP,RPS3
GO:0032269	negative regulation of cellular protein metabolic process	2	76	0.0497	ENSSSCP00000002680,ENSSSCP00000015774	RPS3,SERPINA6

## Sheet: BvsC
Downregulated genes
#term ID	KEGG PATHWAYS; term description	observed gene count	background gene count	false discovery rate	matching proteins in your network (IDs)	matching proteins in your network (labels)
ssc04141	Protein processing in endoplasmic reticulum	3	146	0.0244	ENSSSCP00000005064,ENSSSCP00000006000,ENSSSCP00000016029	HSPA5,HYOU1,PDIA3
ssc04151	PI3K-Akt signaling pathway	4	284	0.0244	ENSSSCP00000008346,ENSSSCP00000017132,ENSSSCP00000025452,ENSSSCP00000026969	EGFR,FN1,IL4R,SGK1
ssc05020	Prion diseases	2	29	0.0244	ENSSSCP00000003825,ENSSSCP00000006000	C1QA,HSPA5
ssc04520	Adherens junction	2	59	0.0439	ENSSSCP00000011181,ENSSSCP00000025452	EGFR,SORBS1
#term ID	BIOLOGICAL PROCESSES; term description	observed gene count	background gene count	false discovery rate	matching proteins in your network (IDs)	matching proteins in your network (labels)
GO:0006952	defense response	4	130	0.0023	ENSSSCP00000002967,ENSSSCP00000003825,ENSSSCP00000008346,ENSSSCP00000012206	C1QA,HP,IL4R,ITIH4
GO:0006953	acute-phase response	2	10	0.0041	ENSSSCP00000002967,ENSSSCP00000012206	HP,ITIH4
GO:0006954	inflammatory response	3	62	0.0041	ENSSSCP00000002967,ENSSSCP00000008346,ENSSSCP00000012206	HP,IL4R,ITIH4
GO:0050789	regulation of biological process	5	648	0.0192	ENSSSCP00000002967,ENSSSCP00000003825,ENSSSCP00000006000,ENSSSCP00000008346,ENSSSCP00000012206	C1QA,HP,HSPA5,IL4R,ITIH4
Upregulated genes
#term ID	CELLULAR COMPONENT; term description	observed gene count	background gene count	false discovery rate	matching proteins in your network (IDs)	matching proteins in your network (labels)
GO:0031090	organelle membrane	3	230	0.0459	ENSSSCP00000002737,ENSSSCP00000006650,ENSSSCP00000023669	ATPIF1,CYP7A1,RPS21
#term ID	MOLECULAR FUNCTION; term description	observed gene count	background gene count	false discovery rate	matching proteins in your network (IDs)	matching proteins in your network (labels)
GO:0005488	binding	5	834	0.0179	ENSSSCP00000002737,ENSSSCP00000006650,ENSSSCP00000008769,ENSSSCP00000022931,ENSSSCP00000023669	ATPIF1,CYP7A1,FABP1,RPS21,TTR
#term ID	KEGG PATHWAYS; term description	observed gene count	background gene count	false discovery rate	matching proteins in your network (IDs)	matching proteins in your network (labels)
ssc03320	PPAR signaling pathway	2	63	0.0102	ENSSSCP00000006650,ENSSSCP00000008769	CYP7A1,FABP1
ssc04976	Bile secretion	2	56	0.0102	ENSSSCP00000006650,ENSSSCP00000016879	ABCB11,CYP7A1
ssc04979	Cholesterol metabolism	2	43	0.0102	ENSSSCP00000006650,ENSSSCP00000016879	ABCB11,CYP7A1
ssc01100	Metabolic pathways	4	1082	0.0401	ENSSSCP00000006650,ENSSSCP00000010733,ENSSSCP00000014070,ENSSSCP00000022970	ACP2,CYP7A1,FDFT1,UPB1
#term ID	REACTOME PATHWAYS; term description	observed gene count	background gene count	false discovery rate	matching proteins in your network (IDs)	matching proteins in your network (labels)
SSC-6798695	Neutrophil degranulation	4	382	0.0083	ENSSSCP00000005884,ENSSSCP00000007326,ENSSSCP00000018540,ENSSSCP00000022931	AGL,ORM1,ORMDL3,TTR
SSC-1430728	Metabolism	6	1350	0.0086	ENSSSCP00000007326,ENSSSCP00000010733,ENSSSCP00000016879,ENSSSCP00000018540,ENSSSCP00000022931,ENSSSCP00000022970	ABCB11,AGL,FDFT1,ORMDL3,TTR,UPB1
SSC-8957322	Metabolism of steroids	2	86	0.0275	ENSSSCP00000016879,ENSSSCP00000022970	ABCB11,FDFT1
