# Supplementary material for: 3′quant mRNA-Seq of Porcine Liver Reveals Alterations in UPR, Acute Phase Response, and Cholesterol and Bile Acid Metabolism in Response to Different Dietary Fats
Source: Genes (Basel). 2020 Sep 18;11(9):1087. doi: 10.3390/genes11091087 (PMC7565913; doi:10.3390/genes11091087)
Supplement: Supplementary file 1 [file genes-11-01087-s001.zip › Supplementary table1..xlsx]

## Sheet: r vs b
							Rapeseed oil					Beef tallow
Ensemble gene ID	baseMean	log2FoldChange	lfcSE	stat	pvalue	padj	a17wcount	a19wcount	a20wcount	a21wcount	a22wcount	z41wcount	z42wcount	z43wcount	z46wcount	z48wcount	gene symbol
ENSSSCG00000006238	99.8425	-2.62766	0.394635	-6.65846	2.76714e-11	4.01789e-08	216.663	149.354	248.343	99.4434	144.927	34.4691	63.3533	12.1343	16.2537	13.4849	CYP7A1
ENSSSCG00000037821	13.8131	-2.45441	0.6239	-3.93398	8.35513e-05	0.00693237	13.5886	32.8367	RGS5	16.9265	8.99546	0.783388	9.83068	8.0895	2.16716	0	RGS5			genes downregulated in beef tallow group
ENSSSCG00000028821	27.2988	-2.13757	0.383205	-5.57813	2.43114e-08	1.56889e-05	37.7462	27.5404	64.7276	27.5056	63.9677	5.48371	14.1999	7.41538	8.66866	15.7324	SASS6			genes upregulated in beef tallow group
ENSSSCG00000004586	18.7032	-2.01916	0.381822	-5.28822	1.2351e-07	6.52133e-05	37.7462	22.2442	22.4565	27.5056	39.9798	12.5342	7.64608	4.71888	4.33433	7.86622	FAM81A		bolded- annotated with Uniprot or Reactome database
ENSSSCG00000033822	110.317	-1.91454	0.36526	-5.24158	1.59209e-07	6.6049e-05	90.5908	158.887	166.442	112.138	342.827	43.8697	61.1687	24.9426	29.2567	73.0435	THRSP
ENSSSCG00000034905	20.4759	-1.81584	0.388189	-4.67771	2.90098e-06	0.000648033	43.0307	16.9479	31.7033	21.1582	45.9768	10.184	14.1999	6.06713	6.50149	8.98996	MVD
ENSSSCG00000026044	252.018	-1.79932	0.324134	-5.55118	2.83745e-08	1.64799e-05	241.576	290.234	641.992	193.597	589.703	101.057	155.106	74.8279	105.107	126.983	FDFT1
ENSSSCG00000000373	13.2746	-1.71006	0.41978	-4.07372	4.62679e-05	0.00433425	18.1182	12.711	23.7775	28.5635	17.9909	6.2671	4.36919	3.37063	10.8358	6.74247
ENSSSCG00000014080	63.4865	-1.69375	0.399613	-4.23847	2.25049e-05	0.00266926	39.256	50.8438	174.368	66.6483	153.922	40.7362	29.492	15.5049	29.2567	34.8361	HMGCR
ENSSSCG00000009140	38.0896	-1.65692	0.425531	-3.89377	9.86973e-05	0.0077464	67.1882	54.0216	67.3696	58.185	41.9788	32.1189	17.4768	2.02238	28.1731	12.3612	CASP6
ENSSSCG00000007857	42.0733	-1.56608	0.349367	-4.48261	7.37354e-06	0.00125957	80.0219	75.2065	38.3082	48.6638	70.9642	24.285	39.3227	8.76363	20.5881	14.6087	ACSM3
ENSSSCG00000009852	14.2402	-1.55264	0.44789	-3.46657	0.000527135	0.0237333	18.8731	13.7702	31.7033	16.9265	24.9874	13.3176	6.55378	2.02238	9.75224	4.49498	VSIG10
ENSSSCG00000032674	21.9485	-1.53852	0.397568	-3.86983	0.000108911	0.00821498	49.07	22.2442	39.6292	33.8531	18.9904	7.05049	14.1999	18.8755	4.33433	11.2375	TCEA3
ENSSSCG00000010212	29.7536	-1.41608	0.295199	-4.79704	1.61027e-06	0.000389686	45.2954	49.7846	34.3453	43.3743	41.9788	10.9674	16.3845	11.4601	27.0896	16.8562	ANK3
ENSSSCG00000006719	94.3533	-1.40721	0.219168	-6.42069	1.35662e-10	1.57585e-07	175.142	127.11	125.492	143.876	112.943	65.0212	65.5378	41.1216	40.0925	47.1973	HSD3B1
ENSSSCG00000005994	87.2393	-1.39696	0.324356	-4.30686	1.65585e-05	0.0020462	219.683	106.984	103.036	112.138	89.9546	70.5049	21.8459	33.7063	62.8478	51.6923	SNTB1
ENSSSCG00000006141	429.316	-1.37935	0.374241	-3.68572	0.000228053	0.0139424	512.593	880.234	748.991	354.399	604.695	51.7036	301.474	332.344	184.209	322.515	CA3
ENSSSCG00000001488	24.6674	-1.3464	0.318174	-4.23163	2.31999e-05	0.0026949	44.5405	24.3627	44.913	24.3319	38.9803	10.184	12.0153	17.5273	14.0866	15.7324	GCLC
ENSSSCG00000014047	19.146	-1.33441	0.365896	-3.64696	0.000265362	0.0151948	25.6674	42.3699	14.5307	26.4477	27.9859	13.3176	9.83068	9.43775	16.2537	5.61873	FGFR4
ENSSSCG00000016872	200.47	-1.33352	0.394295	-3.38203	0.000719533	0.0282854	192.506	141.939	577.265	124.833	399.798	202.897	116.876	89.6586	78.0179	80.9097	HMGCS1
ENSSSCG00000034993	28.5245	-1.32669	0.367992	-3.60521	0.000311897	0.0166362	35.4814	31.7774	50.1969	44.4322	42.9783	17.2345	29.492	21.572	7.58508	4.49498	NREP
ENSSSCG00000007153	49.1427	-1.26209	0.363346	-3.47351	0.000513697	0.023309	94.3655	50.8438	64.7276	57.1271	77.9607	28.202	40.415	6.06713	35.7582	35.9599	ATRN
ENSSSCG00000014111	82.1757	-1.25648	0.273242	-4.59839	4.25764e-06	0.000852702	126.827	95.3322	106.999	138.586	109.945	58.7541	62.261	19.5496	57.4299	46.0736
ENSSSCG00000013337	36.8256	-1.24928	0.284476	-4.39153	1.12556e-05	0.00164417	52.8447	36.0144	60.7647	60.3008	48.9753	21.1515	31.6766	18.2014	27.0896	11.2375	BBOX1
ENSSSCG00000035195	15.0868	-1.24906	0.365147	-3.4207	0.000624603	0.026793	21.8928	27.5404	17.1726	16.9265	22.9884	10.184	6.55378	10.1119	13.003	4.49498	HNMT
ENSSSCG00000004262	31.3445	-1.22203	0.360411	-3.39065	0.000697269	0.0279292	54.3545	36.0144	35.6662	19.0424	72.9632	13.3176	26.2151	12.8084	20.5881	22.4749	KPNA5
ENSSSCG00000001968	22.5432	-1.20851	0.341281	-3.54111	0.000398451	0.0194471	49.07	30.7182	23.7775	20.1003	32.9834	15.6678	19.6614	11.4601	13.003	8.98996	NUBPL
ENSSSCG00000006040	186.415	-1.20371	0.202303	-5.95003	2.68085e-09	2.59507e-06	277.812	228.797	282.688	287.751	222.888	137.093	109.23	93.0293	148.451	76.4147	DPYS
ENSSSCG00000007850	20.3734	-1.19841	0.317111	-3.77914	0.00015737	0.0106279	24.1576	28.5997	27.7404	29.6214	30.9844	8.61727	19.6614	10.1119	13.003	11.2375	ANKS4B
ENSSSCG00000025910	43.915	-1.15444	0.307841	-3.75012	0.000176749	0.0115344	52.8447	68.851	58.1228	59.2429	61.9688	18.0179	40.415	11.4601	39.009	29.2174	ZNF277
ENSSSCG00000035628	33.4475	-1.13919	0.325661	-3.49809	0.000468602	0.0221272	46.0503	46.6069	40.9501	52.8954	42.9783	32.9023	22.9382	7.41538	26.006	15.7324	CCDC115
ENSSSCG00000035706	185.763	-1.12881	0.2326	-4.85301	1.21602e-06	0.000336318	237.801	206.553	269.478	263.419	296.85	161.378	141.999	64.716	99.6896	115.746
ENSSSCG00000036941	26.2708	-1.12804	0.298026	-3.78506	0.000153672	0.0106253	37.7462	32.8367	46.234	29.6214	33.9829	24.285	17.4768	10.786	16.2537	13.4849	AKR1E2
ENSSSCG00000011064	101.219	-1.07473	0.222848	-4.82271	1.41623e-06	0.000365743	157.024	139.821	117.567	123.775	145.926	67.3713	69.907	39.0993	91.0209	60.6823	ACBD5
ENSSSCG00000009184	1314.95	-1.06397	0.312508	-3.40461	0.000662582	0.0272927	2227.78	897.182	2643.27	1164.76	1961.01	797.489	1449.48	506.268	823.522	678.742	ADH4
ENSSSCG00000007770	35.4824	-1.03618	0.316498	-3.2739	0.00106074	0.0377961	84.5515	43.4291	31.7033	42.3164	34.9824	18.8013	30.5843	20.8979	20.5881	26.9699	ORAI3
ENSSSCG00000008233	86.2295	-0.997869	0.263849	-3.78196	0.000155598	0.0106279	113.239	101.688	129.455	112.138	116.941	72.8551	67.7224	26.2909	44.4269	77.5384	TMEM150A
ENSSSCG00000005702	24.6826	-0.99573	0.29187	-3.41156	0.000645934	0.0271854	26.4223	34.9551	35.6662	32.7952	33.9829	14.8844	25.1228	12.1343	16.2537	14.6087	FUBP3
ENSSSCG00000014248	33.8534	-0.992407	0.285026	-3.48181	0.00049804	0.0227765	54.3545	44.4884	40.9501	33.8531	49.9748	24.285	28.3997	11.4601	24.9224	25.8461	LMNB1
ENSSSCG00000014156	48.9671	-0.991988	0.279791	-3.54546	0.000391932	0.019291	49.07	64.6141	87.1842	72.9957	52.9733	52.487	26.2151	22.2461	28.1731	33.7124	ARRDC3
ENSSSCG00000006872	62.6845	-0.961743	0.266784	-3.60495	0.000312215	0.0166362	55.8644	70.9695	79.2583	140.702	67.9657	39.1694	48.0611	46.5146	39.009	39.3311	AGL
ENSSSCG00000005272	43.4029	-0.935823	0.243733	-3.83954	0.000123264	0.0091324	65.6784	50.8438	62.0857	56.0692	50.9743	32.1189	24.0305	33.0321	40.0925	19.1037	NMRK1
ENSSSCG00000037150	33.2467	-0.923782	0.270152	-3.41949	0.000627385	0.026793	31.7068	50.8438	43.5921	38.0847	53.9728	25.0684	16.3845	22.2461	30.3403	20.2274	RPS29
ENSSSCG00000010060	381.62	-0.916719	0.235345	-3.89522	9.81109e-05	0.0077464	474.847	444.884	644.634	532.128	397.799	347.824	297.105	145.611	216.716	314.649	UPB1
ENSSSCG00000008857	901.018	-0.906332	0.279221	-3.24593	0.00117069	0.0404723	1031.98	681.096	1895.59	984.913	1283.35	997.253	621.517	528.514	412.845	573.11	MSMO1
ENSSSCG00000001849	152.51	-0.89078	0.177325	-5.02344	5.07538e-07	0.000173399	194.015	154.65	194.183	213.698	232.883	113.591	111.414	83.5915	119.194	107.88	ANPEP
ENSSSCG00000024800	45.239	-0.889194	0.261133	-3.40513	0.000661318	0.0272927	58.8841	58.2586	47.555	82.5169	45.9768	41.5196	32.7689	20.8979	31.4239	32.5886	DSC2
ENSSSCG00000001984	49.194	-0.88847	0.251248	-3.53622	0.000405893	0.0196452	78.5121	55.0808	64.7276	41.2584	78.9602	33.6857	39.3227	31.6839	26.006	42.7023	KHNYN
ENSSSCG00000016090	91.1734	-0.869561	0.240112	-3.62148	0.000292925	0.0160501	165.328	109.102	113.604	89.9223	111.944	70.5049	72.0916	82.9174	39.009	57.311	SPATS2L
ENSSSCG00000009931	202.418	-0.857382	0.256421	-3.34365	0.000826831	0.0315936	298.95	316.715	244.38	215.813	229.884	135.526	175.86	221.113	76.9343	109.003	MVK
ENSSSCG00000038370	43.548	-0.853358	0.23283	-3.66515	0.000247195	0.0146501	63.4136	54.0216	58.1228	53.9534	51.9738	28.9853	28.3997	42.4699	24.9224	29.2174	UQCC3
ENSSSCG00000001048	59.4702	-0.843845	0.202612	-4.16483	3.11579e-05	0.00335121	88.3261	64.6141	81.9003	64.5324	81.9587	40.7362	45.8765	41.7958	42.2597	42.7023	ADTRP
ENSSSCG00000039388	447.527	-0.836248	0.161269	-5.18541	2.15545e-07	8.34591e-05	484.661	560.342	565.376	522.607	735.629	371.326	321.135	275.717	297.985	340.495	RPS29
ENSSSCG00000010368	425.894	-0.812542	0.182024	-4.46392	8.04719e-06	0.00131268	560.908	561.401	517.821	503.565	568.713	311.005	293.828	248.078	447.519	246.1	GLUD1
ENSSSCG00000016836	249.809	-0.811344	0.198236	-4.09283	4.26146e-05	0.00412509	395.58	281.76	317.033	256.014	338.829	122.208	206.444	182.014	171.206	226.997	NADK2
ENSSSCG00000015926	439.566	-0.805662	0.18392	-4.3805	1.18409e-05	0.00164417	680.941	633.43	512.537	388.253	578.708	278.103	394.319	285.829	313.155	330.381	ABCB11
ENSSSCG00000023686	5283.15	-0.783796	0.161274	-4.86003	1.17365e-06	0.000336318	8320.77	5826.92	6141.2	6461.71	6669.64	4860.92	4057.88	3728.59	3665.76	3098.17	TTR
ENSSSCG00000032007	199.085	-0.782825	0.178688	-4.38097	1.18151e-05	0.00164417	219.683	229.857	274.762	314.199	220.889	170.779	152.922	119.32	161.454	126.983	RTN4
ENSSSCG00000002868	73.1699	-0.781618	0.218667	-3.57447	0.000350943	0.0177242	80.7768	66.7326	109.641	114.254	90.9541	57.9707	56.7995	41.7958	49.8448	62.9297	PEPD
ENSSSCG00000008214	1305.2	-0.775938	0.17053	-4.55015	5.36067e-06	0.00100435	1837.48	1383.38	1667.07	1768.82	1583.2	1232.27	1108.68	815.691	754.173	901.244	FABP1
ENSSSCG00000012676	200.826	-0.771578	0.215666	-3.57766	0.000346688	0.0176628	182.692	281.76	299.861	227.45	274.861	112.024	159.475	158.419	109.442	202.274	MBNL3
ENSSSCG00000028996	3104.9	-0.73558	0.169483	-4.34013	1.42398e-05	0.00183517	4538.6	2943.65	4441.11	3071.11	4403.78	2263.21	2731.84	2319.66	2165	2171.08	ALDH1A1
ENSSSCG00000004136	62.8911	-0.714673	0.225953	-3.16292	0.00156194	0.0490364	86.8162	78.3843	70.0115	89.9223	65.9667	55.6205	53.5226	49.8853	27.0896	51.6923	AIG1
ENSSSCG00000006693	204.731	-0.706395	0.213343	-3.31108	0.000929362	0.0341629	282.341	219.264	240.417	231.682	292.852	116.725	203.167	105.164	196.128	159.572	PDZK1
ENSSSCG00000032768	236.486	-0.694025	0.191045	-3.63278	0.000280388	0.0158106	371.422	224.56	261.552	289.867	313.842	220.132	167.122	178.643	135.448	202.274	EBP
ENSSSCG00000013302	5798.4	-0.675355	0.21386	-3.15793	0.00158894	0.0492425	7247.27	7185.93	7729.01	7137.71	6354.8	4603.19	5939.91	2351.35	5156.77	4278.1	CAT
ENSSSCG00000039060	118.672	-0.665905	0.210177	-3.16831	0.0015333	0.0485373	181.937	118.636	146.628	145.991	132.933	96.3567	73.1839	66.0643	114.86	110.127	RASSF3
ENSSSCG00000037562	136.187	-0.663284	0.194656	-3.40746	0.000655708	0.0272927	176.652	155.709	118.887	170.323	212.893	101.84	115.784	120.668	82.3522	106.756	SLC2A4RG
ENSSSCG00000001038	116.926	-0.662868	0.181667	-3.64881	0.000263461	0.0151948	142.681	167.361	134.739	131.181	141.928	97.9235	69.907	103.141	105.107	75.2909
ENSSSCG00000011147	1448.1	-0.662247	0.206304	-3.21005	0.00132712	0.04413	1604.21	1620.65	2671.01	1483.19	1495.25	1194.67	1394.86	881.756	1203.86	931.585	AKR1C2
ENSSSCG00000027854	431.444	-0.638341	0.19932	-3.20259	0.00136199	0.0446917	437.856	557.164	571.981	572.329	488.754	418.329	318.951	305.379	430.182	213.512	HSD17B6
ENSSSCG00000006079	683.663	-0.625593	0.150421	-4.15896	3.19696e-05	0.00337599	956.488	815.62	935.248	666.483	772.61	475.516	572.364	497.504	614.391	530.408	RIDA
ENSSSCG00000035615	426.46	-0.514392	0.147229	-3.49381	0.000476171	0.0223033	476.357	471.365	541.599	520.491	499.748	340.774	431.457	373.465	326.158	283.184	GSTK1
ENSSSCG00000012236	407.216	-0.491263	0.148059	-3.31803	0.000906558	0.0335369	447.67	460.772	479.513	533.186	456.77	360.358	346.258	256.168	366.251	365.217	OTC
ENSSSCG00000015799	225.55	-0.485239	0.151266	-3.20786	0.00133727	0.04413	276.302	253.16	262.873	239.087	283.857	212.298	217.367	167.857	183.125	159.572	KLKB1
ENSSSCG00000009851	950.474	-0.438482	0.131415	-3.33661	0.00084808	0.0319847	1213.92	1079.37	1210.01	1045.21	920.536	887.578	815.946	746.256	749.839	836.067	PEBP1
ENSSSCG00000003819	330.167	-0.415523	0.127052	-3.2705	0.00107358	0.03801	372.932	370.736	401.575	344.878	396.8	253.818	293.828	293.919	301.236	271.946	ANGPTL3
ENSSSCG00000023674	489.911	0.405304	0.125169	3.23806	0.00120346	0.0408752	394.07	432.173	402.896	470.769	407.794	542.888	527.58	556.153	529.872	634.916	SON
ENSSSCG00000032947	279.135	0.468498	0.135568	3.45582	0.000548627	0.0243239	237.801	211.849	217.96	242.261	259.869	287.503	326.597	331.67	320.74	355.104	SRRM1
ENSSSCG00000014338	364.151	0.493314	0.145201	3.39745	0.000680168	0.0276253	289.891	332.604	354.021	297.272	239.879	397.178	447.842	428.069	405.26	449.498	HSPA9
ENSSSCG00000007355	326.375	0.523417	0.145569	3.59567	0.000323552	0.0168822	272.527	271.167	285.33	225.335	283.857	316.489	393.227	380.207	436.684	398.93	TOP1
ENSSSCG00000026617	1057.73	0.530369	0.129729	4.0883	4.34555e-05	0.00413753	855.329	930.019	943.174	754.289	845.574	1149.23	1252.87	1370.5	1103.09	1373.22	EIF2S2
ENSSSCG00000022225	183.189	0.556783	0.162285	3.4309	0.000601576	0.0262703	160.799	169.479	117.567	130.123	161.918	231.883	223.921	211.675	188.543	235.987	NOP58
ENSSSCG00000008180	353.055	0.561327	0.149139	3.76379	0.00016736	0.0110458	311.784	292.352	243.059	270.825	306.845	379.16	417.258	475.258	358.666	475.344	EIF5B
ENSSSCG00000007469	97.2837	0.561445	0.176726	3.17693	0.00148841	0.0477608	84.5515	74.1473	80.5793	77.2273	76.9612	116.725	98.3068	132.129	132.197	100.013	PTPN1
ENSSSCG00000008433	910.458	0.568547	0.156641	3.62962	0.00028384	0.0158514	725.482	839.983	697.473	655.903	746.624	1214.25	1217.91	793.445	1159.43	1054.07	STPG4
ENSSSCG00000001471	208.025	0.568628	0.173665	3.27428	0.00105932	0.0377961	179.672	152.532	149.27	165.034	188.905	241.283	245.767	183.362	297.985	276.441	BRD2
ENSSSCG00000006901	151.659	0.591939	0.172365	3.43422	0.000594262	0.0261475	147.965	120.754	114.925	89.9223	129.934	180.963	174.768	184.036	205.881	167.438	EVI5
ENSSSCG00000010679	389.222	0.593241	0.15191	3.90522	9.41388e-05	0.00759386	341.226	323.07	239.096	321.604	324.836	398.744	465.319	539.974	454.021	484.334	EIF3A
ENSSSCG00000037465	304.546	0.593963	0.156271	3.80085	0.000144203	0.0100914	225.722	226.679	217.96	297.272	245.876	386.994	327.689	345.826	439.934	331.505	SERP1
ENSSSCG00000009914	147.589	0.594774	0.175888	3.38155	0.000720771	0.0282854	127.582	98.51	116.246	125.891	119.94	184.096	127.799	199.541	186.376	189.913	MLEC
ENSSSCG00000012534	533.069	0.594943	0.141352	4.20894	2.56567e-05	0.00292184	375.952	487.254	434.6	434.801	391.802	609.476	537.41	651.205	723.833	684.361	MORF4L2
ENSSSCG00000007736	99.5326	0.610874	0.174348	3.50377	0.000458729	0.0218385	67.1882	74.1473	85.8632	78.2853	88.9552	127.692	132.168	105.164	124.612	111.251	TMEM248
ENSSSCG00000011243	297.356	0.621945	0.178611	3.48212	0.000497459	0.0227765	251.39	224.56	174.368	220.045	298.849	317.272	327.689	370.769	340.245	448.374	GOLGA4
ENSSSCG00000033207	529.22	0.624731	0.17527	3.5644	0.000364694	0.0182598	298.195	476.661	521.784	385.079	402.797	571.873	652.102	704.461	564.546	714.702	SULT2A1
ENSSSCG00000008998	24435.4	0.634153	0.198953	3.18745	0.00143533	0.0465721	18768.9	20299.4	17580.8	22427.7	16673.6	24047.7	23575.1	45630.9	29190.6	26159.7	FGA
ENSSSCG00000008368	1273.87	0.642496	0.160801	3.99559	6.45329e-05	0.00543199	901.379	1082.55	981.482	1008.19	1000.5	1689.77	1476.79	1290.95	2033.88	1273.2	UGP2
ENSSSCG00000033402	183.171	0.648028	0.18963	3.41733	0.000632379	0.0268092	162.309	140.88	124.171	118.486	165.916	265.568	237.029	157.745	242.722	216.883	SARAF
ENSSSCG00000000633	149.362	0.65904	0.205418	3.20828	0.00133531	0.04413	89.081	129.228	77.9373	141.76	140.929	163.728	171.491	197.519	215.633	166.314	YBX3
ENSSSCG00000014321	88.2962	0.672027	0.205585	3.26886	0.00107983	0.03801	69.453	72.0288	56.8018	50.7796	89.9546	96.3567	126.707	95.0516	122.445	103.385	KLHL3
ENSSSCG00000040439	668.835	0.684513	0.17609	3.88728	0.000101373	0.00785031	456.729	475.602	467.624	698.22	467.764	695.648	691.424	978.83	876.618	879.893	TMED5
ENSSSCG00000004542	185.071	0.692861	0.159807	4.33562	1.45347e-05	0.00183517	150.985	119.695	125.492	136.47	173.912	251.467	215.183	231.225	208.048	238.234	NARS
ENSSSCG00000000377	133.325	0.693244	0.218863	3.16748	0.00153768	0.0485373	83.7965	120.754	110.962	111.08	84.9572	138.66	148.552	246.73	149.534	138.221	PA2G4
ENSSSCG00000007309	215.872	0.695815	0.214492	3.24402	0.00117855	0.0405032	172.123	180.072	133.418	163.976	174.912	214.648	259.967	413.239	205.881	240.482	RBM39
ENSSSCG00000002470	94.5295	0.699054	0.199417	3.50548	0.000455777	0.0218385	70.9628	75.2065	75.2954	61.3587	77.9607	89.3062	119.06	148.308	98.606	129.231	DDX24
ENSSSCG00000007924	107.063	0.721866	0.216226	3.33848	0.000842381	0.0319774	120.788	69.9103	60.7647	79.3432	70.9642	129.259	108.137	133.477	146.284	151.706	UBN1
ENSSSCG00000015504	59.3597	0.728645	0.229974	3.16837	0.00153295	0.0485373	29.442	52.9623	42.2711	56.0692	42.9783	67.3713	86.2915	62.0195	84.5194	69.6722	CACYBP
ENSSSCG00000016828	52.7042	0.730073	0.215652	3.38542	0.000710687	0.0282717	42.2757	38.1329	48.876	29.6214	38.9803	59.5375	72.0916	57.3006	67.1821	73.0435
ENSSSCG00000008536	131.989	0.751354	0.223049	3.36856	0.000755613	0.0292573	125.317	96.3915	77.9373	84.6327	106.946	125.342	150.737	243.359	146.284	162.943
ENSSSCG00000009119	85.6295	0.759714	0.204945	3.70692	0.000209797	0.0131022	64.9234	44.4884	72.6535	60.3008	75.9617	113.591	93.9376	111.231	88.8537	130.354	LARP7
ENSSSCG00000007362	221.657	0.763949	0.18982	4.0246	5.70718e-05	0.00494736	138.151	192.783	130.776	205.234	153.922	309.438	293.828	208.979	266.561	316.896	SRSF6
ENSSSCG00000008831	51.3132	0.782849	0.214309	3.65289	0.000259301	0.0151948	32.4617	44.4884	30.3824	42.3164	38.9803	68.1547	70.9993	62.0195	68.2657	55.0635	DCUN1D4
ENSSSCG00000033146	153.941	0.788829	0.177326	4.44848	8.64818e-06	0.00135753	101.16	127.11	116.246	134.354	86.9562	227.966	166.029	197.519	182.042	200.027	CD163
ENSSSCG00000028466	59.0068	0.797836	0.218854	3.64552	0.000266851	0.0151948	35.4814	47.6661	42.2711	56.0692	33.9829	69.7215	81.9223	62.0195	84.5194	76.4147	UTP3
ENSSSCG00000009334	55.0691	0.799255	0.240201	3.32745	0.000876462	0.0328419	52.8447	39.1921	36.9872	40.2005	30.9844	55.6205	53.5226	84.9398	85.603	70.796	HSPH1
ENSSSCG00000001499	153.359	0.804604	0.183831	4.37686	1.204e-05	0.00164417	113.239	88.9767	95.11	108.965	150.924	185.663	175.86	194.822	188.543	231.492	DST
ENSSSCG00000021669	31.1976	0.806951	0.255606	3.15701	0.00159394	0.0492425	21.1379	24.3627	23.7775	19.0424	24.9874	32.9023	36.0458	39.0993	41.1761	49.4448	MARK3
ENSSSCG00000033074	115.716	0.809173	0.248038	3.2623	0.00110512	0.0386657	73.9825	98.51	68.6905	124.833	54.9723	157.461	97.2145	167.857	178.791	134.849	ZCCHC24
ENSSSCG00000032607	56.2713	0.809336	0.256323	3.15748	0.00159138	0.0492425	38.5011	43.4291	42.2711	47.6059	32.9834	106.541	69.907	47.1888	75.8508	58.4348	ALPL
ENSSSCG00000016159	336.305	0.827014	0.2155	3.83765	0.000124218	0.0091324	217.418	279.641	266.836	280.346	169.914	347.824	409.612	638.396	359.749	393.311	CPS1
ENSSSCG00000028758	189.384	0.833547	0.257401	3.23833	0.00120233	0.0408752	134.376	81.562	210.035	166.092	89.9546	202.897	217.367	268.302	314.239	209.017	LBP
ENSSSCG00000011290	118.269	0.833949	0.225915	3.69143	0.000222993	0.0137782	108.709	75.2065	87.1842	103.675	49.9748	135.526	141.999	177.969	177.707	124.736	HIGD1A
ENSSSCG00000017983	106.994	0.836312	0.262906	3.18103	0.00146753	0.0473524	37.7462	102.747	80.5793	89.9223	73.9627	151.194	132.168	92.3551	175.54	133.726	PER1
ENSSSCG00000011453	1941.67	0.842505	0.233304	3.61118	0.000304801	0.0165447	1230.53	2013.63	859.953	1495.88	1350.32	2088.51	2291.64	2103.94	3651.67	2330.65	ITIH4
ENSSSCG00000016744	94.8414	0.842852	0.221755	3.80083	0.000144212	0.0100914	57.3742	87.9175	72.6535	72.9957	49.9748	128.476	117.968	138.196	141.949	80.9097	TMED4
ENSSSCG00000039658	71.5892	0.86045	0.269614	3.19142	0.00141577	0.0461954	45.2954	42.3699	31.7033	80.4011	53.9728	121.425	98.3068	65.3901	105.107	71.9197	CDNF
ENSSSCG00000010494	110.83	0.861459	0.259209	3.32342	0.000889214	0.0331061	40.011	87.9175	70.0115	123.775	72.9632	153.544	150.737	147.633	154.952	106.756	SORBS1
ENSSSCG00000029849	204.97	0.865776	0.226695	3.81913	0.000133924	0.00960287	135.131	154.65	143.986	183.018	108.945	183.313	217.367	233.921	380.337	309.03	S1PR1
ENSSSCG00000008550	301.654	0.874323	0.245856	3.55625	0.000376188	0.0186743	206.849	287.056	171.726	216.871	182.908	300.821	279.628	630.307	429.099	311.277	SLC5A6
ENSSSCG00000029886	48.286	0.876261	0.235201	3.72558	0.000194863	0.0125752	31.7068	45.5476	30.3824	30.6794	31.9839	65.8046	43.6919	60.6713	69.3493	73.0435	LYVE1
ENSSSCG00000037268	2496.69	0.881687	0.227596	3.87391	0.000107104	0.00818502	2378.01	1906.64	1490.06	1751.9	1255.37	3911.45	2170.39	2687.74	4434.02	2981.3	APCS
ENSSSCG00000011639	71.0499	0.891701	0.232801	3.83031	0.000127981	0.00929143	52.0897	39.1921	48.876	44.4322	64.9672	99.4902	66.6301	126.061	85.603	83.1572	SRPRB
ENSSSCG00000034072	649.908	0.903635	0.224484	4.0254	5.68797e-05	0.00494736	596.39	419.462	282.688	477.117	486.755	672.147	667.394	1203.99	858.197	834.943	HSP90B1
ENSSSCG00000008902	83.7853	0.911521	0.275771	3.30535	0.000948578	0.03465	63.4136	82.6213	33.0243	56.0692	54.9723	78.3388	104.861	140.892	150.618	73.0435	PPAT
ENSSSCG00000010247	81.7316	0.913198	0.242168	3.77093	0.000162641	0.0108577	40.011	62.4956	40.9501	83.5748	56.9713	87.7394	112.507	132.803	114.86	85.4047	DDX21
ENSSSCG00000023984	54.4331	0.923836	0.227972	4.0524	5.06942e-05	0.00463622	32.4617	42.3699	44.913	32.7952	36.9814	64.2378	64.4455	95.0516	71.5164	59.5585	RSL1D1
ENSSSCG00000033962	63.558	0.930127	0.278077	3.34485	0.000823257	0.0315936	25.6674	57.1993	50.1969	40.2005	46.9763	53.2704	78.6454	122.691	89.9373	70.796
ENSSSCG00000009373	398.903	0.968896	0.267458	3.62261	0.000291641	0.0160501	398.6	313.537	190.22	223.219	220.889	451.231	717.639	359.309	373.836	740.548	SLC25A15
ENSSSCG00000037299	52.1753	0.979146	0.29803	3.2854	0.00101838	0.0367376	33.9716	33.8959	43.5921	24.3319	40.9793	48.57	53.5226	122.691	61.7642	58.4348	TIMM10B
ENSSSCG00000016653	131.044	0.986074	0.290026	3.39995	0.000673984	0.0275669	57.3742	108.043	88.5051	122.717	63.9677	249.117	128.891	133.477	245.973	112.375	DNAJB9
ENSSSCG00000036537	108.494	0.987421	0.204934	4.81823	1.44836e-06	0.000365743	83.0416	78.3843	59.4437	82.5169	58.9703	134.743	110.322	134.825	152.785	189.913	NFIC
ENSSSCG00000030497	47.9485	0.989685	0.253027	3.91139	9.17666e-05	0.00750676	19.628	34.9551	31.7033	41.2584	33.9829	68.1547	64.4455	57.9748	80.1851	47.1973	YAE1
ENSSSCG00000006987	1029.91	0.994151	0.308676	3.22069	0.00127883	0.0429333	569.967	1129.16	540.278	946.828	255.871	1160.98	1366.46	1075.9	1717.48	1536.16	SLC7A2
ENSSSCG00000012686	87.7509	1.00699	0.242453	4.15336	3.2763e-05	0.00338426	46.8053	75.2065	70.0115	46.548	53.9728	79.1222	97.2145	140.218	156.036	112.375	MOSPD1
ENSSSCG00000035600	154.278	1.0085	0.299149	3.37124	0.0007483	0.0291686	87.5712	126.05	77.9373	72.9957	146.926	109.674	170.398	194.822	359.749	196.655	DNAJC12
ENSSSCG00000038494	184.416	1.01149	0.250561	4.03691	5.41595e-05	0.00483936	86.0613	174.776	92.468	160.802	97.9506	304.738	199.89	227.854	315.322	184.294	LPIN2
ENSSSCG00000032914	261.011	1.03102	0.24326	4.23832	2.25196e-05	0.00266926	195.525	148.295	113.604	242.261	156.921	468.466	243.582	285.829	442.102	313.525	MANF
ENSSSCG00000021038	19.8394	1.04402	0.320418	3.25831	0.00112076	0.0389784	9.81401	14.8295	17.1726	14.8107	8.99546	22.7182	20.7537	29.6615	28.1731	31.4649	NRIP1
ENSSSCG00000011449	41.278	1.04744	0.291436	3.59407	0.000325552	0.0168822	27.9322	33.8959	15.8517	37.0268	19.9899	72.0717	56.7995	66.7384	48.7612	33.7124	GNL3
ENSSSCG00000004392	114.392	1.05379	0.232289	4.53656	5.71795e-06	0.00103781	48.3151	90.036	59.4437	106.849	67.9657	132.393	126.707	173.924	180.958	157.324	AMD1
ENSSSCG00000016714	161.576	1.08044	0.230063	4.69628	2.64941e-06	0.000615512	84.5515	130.287	75.2954	138.586	90.9541	244.417	214.09	290.548	187.46	159.572	CYCS
ENSSSCG00000002753	26.3615	1.08222	0.290808	3.72143	0.000198095	0.0126432	17.3632	10.5925	17.1726	17.9845	20.9894	35.2524	42.5996	29.6615	28.1731	43.8261	NOB1
ENSSSCG00000010576	63.8486	1.11749	0.240684	4.64298	3.43416e-06	0.000727199	33.2166	61.4363	31.7033	37.0268	37.9809	101.057	93.9376	69.4349	100.773	71.9197	NOLC1
ENSSSCG00000003729	341.363	1.12647	0.322725	3.4905	0.000482118	0.0224011	293.665	148.295	208.714	305.736	114.942	453.582	365.92	282.458	371.669	868.655	RNF125
ENSSSCG00000000998	17.0941	1.13275	0.333669	3.39483	0.000686721	0.0276978	9.05908	12.711	9.2468	12.6949	9.99496	27.4186	27.3074	21.572	17.3373	23.5987	RPP40
ENSSSCG00000010085	84.0949	1.14061	0.252236	4.522	6.1258e-06	0.00107814	61.9037	37.0736	47.555	48.6638	66.9662	148.06	75.3685	124.713	144.116	86.5284	POMT1
ENSSSCG00000015383	32.7804	1.16804	0.288363	4.05059	5.10878e-05	0.00463622	24.9125	19.0664	19.8146	22.2161	14.9924	35.2524	33.8612	66.0643	44.4269	47.1973	RAPGEF5
ENSSSCG00000012880	178.99	1.19505	0.257624	4.63872	3.50578e-06	0.000727199	92.8556	95.3322	54.1599	172.439	128.935	320.406	228.29	252.123	232.97	212.388	CPT1A
ENSSSCG00000012007	67.219	1.21555	0.296585	4.09847	4.15893e-05	0.00409408	28.6871	61.4363	35.6662	47.6059	29.9849	124.559	76.4608	107.86	111.609	48.3211	HSPA13
ENSSSCG00000004419	20.7213	1.23042	0.373082	3.29798	0.000973846	0.0353506	9.05908	16.9479	13.2097	13.7528	8.99546	30.5521	21.8459	14.8308	47.6776	30.3411	SLC16A10
ENSSSCG00000015106	123.745	1.23105	0.243249	5.06085	4.17389e-07	0.000151512	64.1685	83.6805	60.7647	98.3855	62.9683	215.432	116.876	159.768	240.555	134.849	HYOU1
ENSSSCG00000009111	22.6757	1.2878	0.372298	3.45905	0.000542076	0.0242183	9.81401	10.5925	18.4936	9.52118	17.9909	18.0179	34.9535	38.4251	49.8448	19.1037	SYNPO2
ENSSSCG00000030268	191.264	1.29909	0.293292	4.42935	9.45166e-06	0.00144461	73.2276	110.162	118.887	170.323	80.9592	292.987	247.952	233.247	439.934	144.963	ZFAND5
ENSSSCG00000021443	108.854	1.32572	0.319858	4.14471	3.40239e-05	0.00340709	63.4136	41.3106	59.4437	111.08	34.9824	130.042	116.876	133.477	269.812	128.107	SGK1
ENSSSCG00000015067	1357.48	1.32912	0.320252	4.15024	3.32133e-05	0.00338426	1044.81	834.687	673.696	1090.7	219.889	1646.68	1951.94	1452.74	2439.14	2220.52	ZPR1
ENSSSCG00000025027	13.8289	1.33506	0.370922	3.5993	0.000319071	0.0168469	8.30416	5.29623	9.2468	10.5791	5.99698	23.5016	21.8459	18.2014	17.3373	17.9799	METTL1
ENSSSCG00000032381	217.854	1.35107	0.277477	4.86911	1.121e-06	0.000336318	113.239	187.487	77.9373	175.613	58.9703	331.373	262.151	307.401	357.582	306.783	LITAF
ENSSSCG00000011297	221.843	1.36068	0.259161	5.25034	1.51817e-07	6.6049e-05	114.748	118.636	130.776	173.497	83.9577	308.655	334.243	190.103	494.113	269.699	ABHD5
ENSSSCG00000015140	293.134	1.37507	0.198711	6.91995	4.51812e-12	8.74709e-09	160.044	197.02	191.541	151.281	115.942	414.412	419.442	298.637	491.946	491.077	HSPA8
ENSSSCG00000027294	79.1716	1.37852	0.330591	4.16988	3.04762e-05	0.00335121	31.7068	57.1993	47.555	52.8954	31.9839	93.2231	61.1687	222.461	84.5194	109.003	CDV3
ENSSSCG00000031378	55.5188	1.3815	0.428659	3.22283	0.00126932	0.0428618	36.2363	33.8959	26.4194	22.2161	34.9824	30.5521	60.0764	121.343	163.621	25.8461	KBTBD6
ENSSSCG00000000892	119.413	1.39126	0.303491	4.58418	4.55774e-06	0.000882379	117.013	72.0288	47.555	58.185	32.9834	109.674	178.044	215.72	152.785	210.14	HAL
ENSSSCG00000033185	18.3896	1.39542	0.388938	3.58777	0.000333518	0.0171423	6.03939	10.5925	17.1726	11.637	5.99698	17.2345	19.6614	22.9203	41.1761	31.4649	PPP2R3A
ENSSSCG00000034321	331.79	1.3973	0.380178	3.67537	0.000237505	0.0142209	84.5515	252.101	120.208	355.457	100.949	343.124	394.319	453.012	895.039	319.144	TP53INP1
ENSSSCG00000029438	40.3502	1.47283	0.330116	4.46156	8.13647e-06	0.00131268	15.8534	25.4219	27.7404	12.6949	25.9869	52.487	55.7072	67.4125	92.1045	28.0936	SESN2
ENSSSCG00000030095	77.6664	1.49365	0.301677	4.95117	7.37704e-07	0.000238033	24.9125	42.3699	29.0614	76.1694	30.9844	104.191	116.876	75.502	147.367	129.231	ZBTB16
ENSSSCG00000007043	77.5621	1.49767	0.374653	3.99748	6.40206e-05	0.00543199	30.9519	43.4291	33.0243	37.0268	57.9708	49.3534	88.4761	84.2656	258.976	92.1471	GPCPD1
ENSSSCG00000020754	31.6717	1.51199	0.287554	5.25811	1.45544e-07	6.6049e-05	12.8337	20.1257	18.4936	14.8107	16.9914	37.6026	45.8765	66.0643	40.0925	43.8261	CD3EAP
ENSSSCG00000036785	68.2555	1.53576	0.353802	4.34075	1.42e-05	0.00183517	36.9913	63.5548	30.3824	30.6794	12.9934	51.7036	126.707	92.3551	88.8537	148.334	MTMR7
ENSSSCG00000005601	1136.33	1.54253	0.182661	8.44477	3.0465e-17	1.76941e-13	750.394	548.69	575.944	545.881	481.757	1641.2	1240.85	1851.82	2142.24	1584.48	HSPA5
ENSSSCG00000039862	16.4975	1.69149	0.456302	3.70696	0.000209762	0.0131022	6.79431	9.53322	11.8887	6.34745	4.99748	28.202	8.73838	28.3133	14.0866	46.0736	TRIB3
ENSSSCG00000036684	17.1005	1.69634	0.495748	3.42178	0.000622134	0.026793	7.54924	9.53322	3.96292	14.8107	3.99798	18.0179	13.1076	12.1343	54.1791	33.7124	TTPAL
ENSSSCG00000022126	96.7049	1.73389	0.209753	8.26633	1.38145e-16	4.01173e-13	43.0307	54.0216	33.0243	40.2005	51.9738	155.111	162.752	109.882	147.367	169.686	EGFR
ENSSSCG00000013369	42.2264	1.75463	0.421162	4.16617	3.09765e-05	0.00335121	17.3632	27.5404	15.8517	30.6794	4.99748	86.1727	70.9993	21.572	94.2716	52.816	SAA2
ENSSSCG00000010686	368.998	1.78848	0.313312	5.70831	1.14106e-08	8.28406e-06	159.289	176.894	134.739	238.029	118.94	662.746	605.133	238.64	961.137	394.435	BAG3
ENSSSCG00000007554	41.5115	1.80872	0.413473	4.37447	1.21728e-05	0.00164417	20.3829	18.0072	15.8517	29.6214	7.99597	76.772	25.1228	31.0098	109.442	80.9097	ZFAND2A
ENSSSCG00000035058	43.2666	1.81647	0.314355	5.77841	7.54109e-09	6.25695e-06	18.1182	34.9551	6.60486	22.2161	12.9934	74.4218	69.907	52.5818	80.1851	60.6823	PID1
ENSSSCG00000028875	18.0377	2.09133	0.568127	3.6811	0.000232227	0.0140497	0	18.0072	7.92583	2.11582	6.99647	18.0179	17.4768	47.1888	37.9254	24.7224	HAVCR2

## Sheet: r vs c
							Rapeseed oil					Coconut oil
Ensemble gene ID	baseMean	log2FoldChange	lfcSE	stat	pvalue	padj	a17wcount	a19wcount	a20wcount	a21wcount	a22wcount	z49wcount	z52wcount	z53wcount	z54wcount	z55wcount	z56wcount	gene symbol
ENSSSCG00000037775	116.273	-1.44417	0.363807	-3.96961	7.19915e-05	0.00956917	326.047	289.15	85.6431	109.383	76.1434	52.2922	69.2761	86.1298	55.0632	38.5822	91.2958	IGHA2
ENSSSCG00000023331	66.77	-1.34666	0.227918	-5.90852	3.45205e-09	3.07664e-06	100.622	89.4729	88.3619	111.549	103.926	28.2892	28.6341	51.0399	67.8686	31.5088	33.1985	UBL5			genes downregulated in coconut oil group
ENSSSCG00000005994	89.505	-1.25381	0.317857	-3.94457	7.99433e-05	0.00956917	226.985	110.204	106.034	114.798	92.6069	26.5747	45.2604	116.435	47.38	51.4429	46.8336	SNTB1			genes upregulated in coconut oil group
ENSSSCG00000018093	191.406	-1.1542	0.282561	-4.08478	4.41189e-05	0.0065535	249.606	353.527	180.802	403.958	178.011	76.2952	209.676	159.5	103.724	99.6706	90.703	ND5
ENSSSCG00000007710	74.535	-1.14192	0.261803	-4.36175	1.29024e-05	0.00328551	82.6819	108.022	108.753	68.2288	160.519	47.1487	60.9629	55.8249	65.3075	32.7949	29.6415	MLXIPL
ENSSSCG00000027926	93.9186	-1.13552	0.271934	-4.17573	2.97033e-05	0.00621059	154.443	149.485	116.91	90.9717	151.258	66.0082	61.8866	105.27	66.5881	27.0075	43.2766	FTCD
ENSSSCG00000003302	192.907	-1.00827	0.204663	-4.92646	8.37326e-07	0.000426438	337.748	266.236	243.335	207.935	273.705	171.45	152.407	98.8898	145.982	78.4504	145.836	TMEM86B
ENSSSCG00000031881	48.0792	-1.00586	0.20051	-5.0165	5.2621e-07	0.000312657	60.0613	81.8349	67.9707	66.0628	56.5931	29.1465	40.642	35.0899	21.7692	34.724	34.977	CDC42SE1
ENSSSCG00000011179	47.8721	-0.971237	0.241694	-4.01846	5.85786e-05	0.00835331	63.1814	96.0196	74.7678	43.3199	48.3614	33.4327	35.0999	30.3049	46.0994	26.3645	29.6415	MRPL3
ENSSSCG00000016593	35.2081	-0.935513	0.237565	-3.93791	8.21928e-05	0.00956917	66.3015	41.463	48.9389	34.6559	47.3324	20.574	31.4051	19.14	23.0497	28.9366	25.4917	ARF5
ENSSSCG00000035790	110.421	-0.93006	0.218233	-4.26177	2.0281e-05	0.00482012	157.564	139.665	194.396	127.794	121.418	64.2937	74.8181	138.765	64.027	64.3036	67.5826	BTG1
ENSSSCG00000006719	104.691	-0.922508	0.200123	-4.60971	4.03238e-06	0.00130686	180.964	130.936	129.144	147.288	116.273	76.2952	63.734	71.7749	78.1129	106.101	50.9834	HSD3B1
ENSSSCG00000031302	45.8086	-0.910298	0.200106	-4.54909	5.38791e-06	0.00147753	56.9413	69.8325	74.7678	50.9008	55.5641	32.5755	24.0157	33.4949	37.1356	36.6531	32.0128	CTBP1
ENSSSCG00000006395	81.5013	-0.902221	0.276521	-3.26276	0.00110332	0.0446968	114.663	148.394	107.394	84.4737	89.52	94.2974	53.5735	49.4449	83.2351	27.6506	43.8694
ENSSSCG00000010627	44.6354	-0.880372	0.214502	-4.10426	4.05616e-05	0.00638521	70.9816	60.0123	66.6113	46.5688	51.4483	34.29	37.8709	43.0649	23.0497	25.0784	32.0128	PDCD4
ENSSSCG00000036136	31.9403	-0.860371	0.255964	-3.3613	0.000775767	0.0350077	53.0412	24.0049	35.3448	53.0668	44.2455	27.432	21.2447	30.3049	20.4886	23.7923	18.3777	BHLHE40
ENSSSCG00000016174	297.5	-0.810199	0.197556	-4.10111	4.11179e-05	0.00638521	429.01	413.539	296.352	406.124	395.123	316.325	181.041	205.755	288.121	147.255	193.855	FN1
ENSSSCG00000004700	217.425	-0.803244	0.217635	-3.69079	0.000223559	0.0159056	243.365	400.446	236.538	241.508	294.284	222.028	194.897	130.79	195.923	122.82	109.081	PDIA3
ENSSSCG00000014558	36.9777	-0.784803	0.234582	-3.34554	0.000821236	0.0359877	52.2612	64.3768	38.0636	42.2369	43.2165	35.1472	34.1762	17.545	29.4524	28.9366	21.3419	SIRT3
ENSSSCG00000007160	92.0912	-0.768904	0.195035	-3.94239	8.06751e-05	0.00956917	161.464	106.931	82.9243	102.885	136.852	83.1532	72.9708	76.5598	70.4297	56.5872	62.2472	DDRGK1
ENSSSCG00000015034	135.665	-0.753911	0.215444	-3.49933	0.000466423	0.0255815	193.444	154.941	163.13	185.192	170.808	51.435	97.9102	146.74	134.457	88.739	105.524	SDHD
ENSSSCG00000004244	243.495	-0.753363	0.21807	-3.45469	0.000550926	0.0272785	277.686	378.623	368.401	321.65	214.025	185.166	178.27	259.984	231.778	154.972	107.895	MAN1A1
ENSSSCG00000014111	93.4067	-0.753286	0.207073	-3.63777	0.000275005	0.0169033	131.043	98.2019	110.113	141.873	113.186	61.7219	66.505	122.815	66.5881	58.5163	56.9117
ENSSSCG00000039740	88.9242	-0.75165	0.204178	-3.68135	0.000232003	0.0159056	106.082	127.662	116.91	98.5527	117.302	46.2915	75.7418	111.65	62.7464	55.9442	59.283
ENSSSCG00000003150	80.2124	-0.73866	0.201921	-3.65817	0.00025402	0.0165965	89.702	127.662	101.956	83.3907	107.012	69.4372	69.2761	84.5348	58.9048	42.4404	48.0192	NUCB1
ENSSSCG00000013514	224.86	-0.729499	0.176057	-4.14353	3.41999e-05	0.00638521	235.565	358.983	261.007	349.808	231.517	188.595	155.178	124.41	215.131	189.053	164.214
ENSSSCG00000007669	136.821	-0.712636	0.1918	-3.71552	0.00020279	0.014754	158.344	172.399	202.553	192.773	140.968	62.5792	100.681	121.22	140.859	96.4555	116.195	GNB2
ENSSSCG00000002475	375.719	-0.71111	0.183422	-3.8769	0.000105797	0.0110931	589.693	522.652	379.277	455.941	433.194	402.907	226.302	333.354	317.574	252.07	219.94	SERPINA6
ENSSSCG00000017936	291.189	-0.700185	0.170749	-4.10067	4.11949e-05	0.00638521	507.791	382.987	280.039	275.081	393.065	247.745	250.317	232.87	230.497	199.341	203.341
ENSSSCG00000026626	72.6422	-0.696457	0.200989	-3.46515	0.000529941	0.0269891	95.9421	70.9236	85.6431	124.545	79.2303	40.2907	60.0392	70.1799	66.5881	47.5847	58.0973	RER1
ENSSSCG00000029521	86.0324	-0.675972	0.174695	-3.86943	0.000109091	0.0111117	111.542	120.025	99.2372	87.7227	120.389	73.7234	72.9708	60.6099	81.9545	48.2277	69.9539	CD82
ENSSSCG00000001849	163.004	-0.653561	0.156979	-4.16337	3.13578e-05	0.00621059	200.464	159.305	199.834	218.765	239.749	151.733	121.002	103.675	144.701	145.326	108.488	ANPEP
ENSSSCG00000003524	457.623	-0.653559	0.195481	-3.34334	0.000827768	0.0359877	667.695	728.876	633.487	410.456	413.644	424.338	448.909	406.724	303.488	271.361	324.871	C1QA
ENSSSCG00000039388	473.7	-0.646922	0.166231	-3.89171	9.95382e-05	0.0107531	500.771	577.209	581.829	535	757.319	494.633	351.922	303.049	376.479	437.265	295.229	RPS29
ENSSSCG00000008233	95.24	-0.640238	0.173854	-3.68262	0.000230849	0.0159056	117.003	104.749	133.223	114.798	120.389	65.1509	96.0628	71.7749	93.4794	75.8783	55.1332	TMEM150A
ENSSSCG00000002307	194.271	-0.636996	0.168646	-3.77713	0.000158648	0.014502	309.667	246.596	199.834	188.441	258.27	188.595	161.644	153.12	171.592	123.463	135.758	ERH
ENSSSCG00000037562	138.795	-0.625474	0.159727	-3.91589	9.00712e-05	0.0100345	182.524	160.396	122.347	174.362	219.17	127.73	105.3	100.485	106.285	120.248	107.895	SLC2A4RG
ENSSSCG00000014855	870.267	-0.620619	0.120373	-5.1558	2.52556e-07	0.000180073	1283.13	928.554	1090.25	955.203	1113.34	665.225	653.042	829.398	719.663	699.624	635.514	RPS3
ENSSSCG00000031370	159.829	-0.602067	0.158631	-3.7954	0.000147405	0.0139723	200.464	180.037	175.364	225.263	194.474	137.16	114.536	180.235	134.457	110.602	105.524
ENSSSCG00000036411	353.5	-0.587619	0.18235	-3.22247	0.00127089	0.0487174	576.433	415.721	394.23	271.832	501.106	239.173	243.852	331.759	311.171	292.582	310.643	ACOT13
ENSSSCG00000030309	729.165	-0.547325	0.168552	-3.24721	0.00116541	0.0461631	873.62	1072.58	861.868	713.695	883.881	804.957	726.013	478.499	568.56	459.128	578.009	NDRG2
ENSSSCG00000014195	127.888	-0.536127	0.156553	-3.42456	0.000615786	0.0292704	169.264	164.761	138.66	157.034	135.823	109.728	123.773	116.435	116.529	97.0985	77.6607	MAN2A1
ENSSSCG00000022206	478.795	-0.487811	0.13793	-3.53666	0.000405227	0.0233005	497.651	612.125	630.768	472.186	622.524	408.051	413.809	513.589	357.271	396.11	342.656	UOX
ENSSSCG00000013302	6341.74	-0.413653	0.115813	-3.57173	0.000354628	0.0214279	7488.17	7402.24	7953.93	7306.98	6542.16	4700.3	6146.17	6691.01	5393.63	4975.17	5159.4	CAT
ENSSSCG00000008012	332.919	-0.364845	0.108949	-3.34876	0.000811755	0.0359877	419.649	373.167	401.027	327.065	373.514	311.181	320.517	299.859	276.597	279.721	279.816
ENSSSCG00000033673	439.155	0.437839	0.106493	4.11144	3.93194e-05	0.00638521	404.049	384.079	342.572	351.974	358.08	485.203	479.39	494.449	443.067	516.358	571.488	SLC25A6
ENSSSCG00000014338	372.522	0.44356	0.121567	3.64868	0.000263594	0.0165965	299.527	342.616	364.323	304.322	246.952	384.905	445.214	430.649	458.433	414.115	406.681	HSPA9
ENSSSCG00000007355	340.133	0.522736	0.138704	3.76871	0.000164093	0.0146248	281.586	279.33	293.633	230.678	292.226	380.619	423.969	282.314	394.406	455.27	427.43	TOP1
ENSSSCG00000000045	103.749	0.529387	0.15272	3.46639	0.000527503	0.0269891	81.1218	99.293	82.9243	66.0628	88.491	125.158	117.307	121.22	120.371	103.529	135.758	NDUFA6
ENSSSCG00000002529	349.926	0.533189	0.160728	3.31734	0.000908779	0.0381152	346.328	262.963	331.697	189.524	276.792	398.621	350.999	413.104	364.954	441.123	473.078	RPS21
ENSSSCG00000016535	1557.15	0.540853	0.164067	3.29654	0.000978828	0.0401094	1472.67	1097.68	1079.37	1249.78	1340.74	1987.96	2119.85	1280.78	1384.26	1976.05	2139.52	CALD1
ENSSSCG00000033402	183.494	0.546011	0.167853	3.25292	0.00114227	0.0457549	167.704	145.121	127.785	121.296	170.808	241.744	213.37	156.31	265.072	176.835	232.389	SARAF
ENSSSCG00000010679	399.22	0.549083	0.150559	3.64696	0.000265357	0.0165965	352.568	332.795	246.054	329.231	334.414	436.34	483.085	336.544	458.433	509.285	572.674	EIF3A
ENSSSCG00000032831	134.283	0.554999	0.148026	3.74934	0.000177299	0.014754	101.402	108.022	101.956	125.628	99.8096	146.59	155.178	118.03	180.556	162.688	177.256	BRI3BP
ENSSSCG00000011038	189.25	0.555896	0.166439	3.33993	0.000837984	0.0359929	131.823	150.576	201.193	138.624	132.737	206.597	254.936	259.984	172.873	185.194	247.21	MRC1
ENSSSCG00000008180	371.94	0.580101	0.152946	3.79284	0.000148933	0.0139723	322.147	301.153	250.132	277.247	315.892	466.344	414.733	288.694	446.908	497.067	511.02	EIF5B
ENSSSCG00000002470	93.9864	0.58215	0.17122	3.40001	0.000673835	0.0311977	73.3216	77.4704	77.4866	62.8138	80.2593	124.301	82.2076	87.7248	125.493	125.392	117.38	DDX24
ENSSSCG00000008433	958.912	0.583808	0.148364	3.93496	8.32102e-05	0.00956917	749.597	865.268	717.771	671.458	768.637	1040.7	1063.16	928.288	970.649	1212.77	1559.74	STPG4
ENSSSCG00000033653	355.998	0.632072	0.187114	3.378	0.00073014	0.0333712	347.888	265.145	269.164	209.018	279.879	439.769	409.191	282.314	391.845	414.115	607.651	U2AF1
ENSSSCG00000004542	189.655	0.64327	0.176095	3.65297	0.00025922	0.0165965	156.003	123.298	129.144	139.707	179.04	223.742	190.278	151.525	261.23	256.571	275.666	NARS
ENSSSCG00000010954	158.312	0.65964	0.190766	3.45784	0.000544525	0.0272785	81.9018	126.571	130.504	135.375	129.65	246.888	177.347	189.805	138.298	156.258	228.832
ENSSSCG00000024938	69.7193	0.677753	0.192586	3.51923	0.0004328	0.024491	49.1411	43.6453	72.0489	63.8968	34.9848	70.2944	85.9023	90.9148	88.3572	82.9517	84.7747	SH3BP5
ENSSSCG00000039307	59.3265	0.683579	0.196177	3.48449	0.000493073	0.0264511	41.3409	39.2808	38.0636	45.4858	59.68	74.5807	70.1997	66.9899	60.1854	64.3036	92.4815	H2AFJ
ENSSSCG00000033385	195.56	0.699534	0.216737	3.22757	0.00124848	0.0483785	155.223	194.222	153.614	109.383	119.36	318.039	256.783	148.335	188.239	203.843	304.122
ENSSSCG00000011297	173.116	0.728746	0.212788	3.42475	0.000615355	0.0292704	118.563	122.207	134.582	177.611	86.4331	305.181	201.362	175.45	142.14	216.06	224.683	ABHD5
ENSSSCG00000029160	38.7853	0.738147	0.223344	3.30498	0.000949816	0.0393732	29.6407	28.3694	24.4695	29.2409	29.84	63.4364	37.8709	52.6349	40.9773	38.5822	51.5762	HSPA1A
ENSSSCG00000005601	824.338	0.762044	0.204044	3.73471	0.000187934	0.014754	775.337	565.207	592.705	558.826	495.961	1447.04	757.418	617.264	1197.3	1055.22	1005.44	HSPA5
ENSSSCG00000014129	30.9835	0.784043	0.235271	3.33251	0.000860653	0.0365265	16.3804	27.2783	20.3912	19.4939	28.811	37.719	39.7183	30.3049	39.6967	43.0834	37.9411	ZCCHC9
ENSSSCG00000038494	177.204	0.809837	0.217851	3.71739	0.000201289	0.014754	88.922	180.037	95.159	164.615	100.839	207.454	258.631	186.615	192.081	182.622	292.265	LPIN2
ENSSSCG00000029849	210.729	0.816071	0.218728	3.73099	0.000190728	0.014754	139.623	159.305	148.176	187.358	112.157	396.906	320.517	172.26	197.203	214.774	269.738	S1PR1
ENSSSCG00000030268	161.222	0.824018	0.220843	3.73123	0.000190544	0.014754	75.6617	113.478	122.347	174.362	83.3462	230.6	168.11	194.59	210.008	146.612	254.324	ZFAND5
ENSSSCG00000005976	44.7252	0.832594	0.242926	3.42735	0.000609496	0.0292704	39.0009	27.2783	17.6724	27.0749	45.2745	46.2915	56.3445	51.0399	44.8189	71.377	65.8041	NDUFB9
ENSSSCG00000029886	50.3995	0.858861	0.241035	3.56322	0.000366327	0.0216001	32.7607	46.9187	31.2665	31.4069	32.9269	98.5837	47.1077	59.0149	48.6605	54.0151	71.7324	LYVE1
ENSSSCG00000004054	110.258	0.860574	0.247772	3.47325	0.000514197	0.0269576	89.702	63.2857	130.504	48.7348	50.4193	101.155	121.002	169.07	121.651	161.402	155.914
ENSSSCG00000011000	252.52	0.864747	0.187243	4.61833	3.86847e-06	0.00130686	109.982	225.864	207.99	154.868	175.953	267.462	313.128	267.959	396.967	358.171	299.379	DNAJA1
ENSSSCG00000039658	75.7192	0.875142	0.221275	3.955	7.65333e-05	0.00956917	46.801	43.6453	32.6259	82.3077	55.5641	116.586	98.8338	66.9899	87.0767	102.886	99.5955	CDNF
ENSSSCG00000031838	72.4929	0.888989	0.237483	3.74337	0.000181565	0.014754	29.6407	52.3744	65.2519	44.4029	57.6221	88.2967	59.1156	118.03	70.4297	99.0276	113.231	RPS27
ENSSSCG00000012880	165.727	0.915209	0.244576	3.74202	0.000182548	0.014754	95.9421	98.2019	55.736	176.528	132.737	204.883	180.118	145.145	216.411	277.792	239.503	CPT1A
ENSSSCG00000023565	83.4084	0.941207	0.253202	3.71721	0.000201432	0.014754	45.241	52.3744	92.4402	34.6559	56.5931	97.7264	96.9865	65.3949	96.0405	139.539	140.501	IKZF5
ENSSSCG00000022126	68.5509	0.941611	0.19668	4.78753	1.68849e-06	0.000668829	44.461	55.6477	33.9854	41.1539	53.5062	107.156	92.3681	65.3949	83.2351	74.5922	102.56	EGFR
ENSSSCG00000039147	108.179	0.959641	0.209362	4.58364	4.56947e-06	0.00135751	99.8422	61.1034	70.6895	77.9757	47.3324	111.442	162.568	122.815	113.968	140.825	181.406
ENSSSCG00000010860	131.653	0.968695	0.272037	3.56089	0.000369595	0.0216001	127.143	112.387	55.736	66.0628	70.9986	229.743	143.171	108.46	137.018	132.465	264.995	PSEN2
ENSSSCG00000032061	47.6039	0.97457	0.285138	3.41789	0.000631086	0.0296029	31.9807	28.3694	38.0636	23.8259	32.9269	36.8617	30.4815	98.8898	64.027	69.4479	68.7683
ENSSSCG00000015067	1224.11	0.991863	0.28266	3.50903	0.000449741	0.025052	1079.54	859.812	693.301	1116.57	226.372	1686.21	1467.73	1355.75	1811.96	1418.54	1749.44	ZPR1
ENSSSCG00000030095	64.9199	1.02153	0.26813	3.80983	0.000139061	0.0137709	25.7406	43.6453	29.9071	77.9757	31.8979	84.8677	69.2761	66.9899	83.2351	86.1669	114.416	ZBTB16
ENSSSCG00000017262	86.3924	1.03419	0.318986	3.24213	0.00118642	0.0464789	54.6012	110.204	47.5795	37.9049	24.6952	66.0082	124.697	92.5098	147.262	91.3112	153.543	SLC16A6
ENSSSCG00000000802	47.7866	1.10988	0.31872	3.48231	0.000497117	0.0264511	9.36021	32.734	55.736	29.2409	21.6083	85.7249	48.0314	60.6099	69.1491	63.6606	49.7977	NELL2
ENSSSCG00000015140	277.66	1.13868	0.179868	6.33065	2.44129e-10	4.3516e-07	165.364	202.951	197.115	154.868	119.36	312.896	441.519	288.694	473.8	378.748	318.943	HSPA8
ENSSSCG00000004093	289.995	1.14305	0.193056	5.92081	3.20363e-09	3.07664e-06	219.185	139.665	150.895	228.512	134.794	360.045	375.014	299.859	454.592	506.07	321.314	IYD
ENSSSCG00000007554	32.2071	1.19409	0.325654	3.66676	0.000245643	0.016523	21.0605	18.5492	16.313	30.3239	8.23172	53.1494	29.5578	28.7099	62.7464	56.5872	29.0487	ZFAND2A
ENSSSCG00000010686	338.972	1.49492	0.200138	7.46947	8.05195e-14	2.87052e-10	164.584	182.219	138.66	243.674	122.447	614.648	378.709	403.534	428.981	434.693	616.543	BAG3
ENSSSCG00000011437	132.129	1.50315	0.30991	4.85027	1.23291e-06	0.000549416	31.9807	84.0172	51.6577	118.047	44.2455	112.3	187.507	240.845	282.999	157.544	142.279	ALAS1
ENSSSCG00000024596	69.2312	1.62217	0.383029	4.23511	2.28437e-05	0.00508987	21.8405	36.0074	17.6724	57.3988	28.811	38.5762	199.515	137.17	79.3935	90.0251	55.1332	NOCT

## Sheet: b vs c
							Beef tallow					Coconut oil
Ensemble gene ID	baseMean	log2FoldChange	lfcSE	stat	pvalue	padj	a41wcount	a42wcount	a43wcount	a46wcount	a48wcount	z49wcount	z52wcount	z53wcount	z54wcount	z55wcount	z56wcount	gene symbol
ENSSSCG00000021443	109.15	-1.4585	0.302392	-4.82322	1.41261e-06	0.000506983	138.804	124.744	144.455	289.089	137.033	40.2685	107.825	69.7492	63.6364	47.8022	37.2455	SGK1
ENSSSCG00000011453	1754.98	-1.4292	0.20423	-6.99797	2.59694e-12	2.7995e-09	2229.22	2445.91	2276.99	3912.57	2493.03	885.012	864.525	682.546	1190.53	1325	999.42	ITIH4			genes downregulated in coconut oil group
ENSSSCG00000032381	221.099	-1.41599	0.142678	-9.92434	3.26257e-23	7.0341e-20	353.699	279.799	332.684	383.13	328.157	101.119	142.483	117.909	137.879	128.595	126.635	LITAF			genes upregulated in coconut oil group
ENSSSCG00000004700	287.551	-1.34382	0.285022	-4.7148	2.41954e-06	0.000652066	304.365	251.819	757.294	480.654	352.198	231.768	203.135	136.177	202.841	128.595	114.219	PDIA3
ENSSSCG00000028758	176.563	-1.28086	0.203231	-6.30249	2.92901e-10	2.10498e-07	216.567	232	290.369	336.69	223.58	102.908	82.7942	86.3562	163.068	94.2579	113.599	LBP
ENSSSCG00000000892	126.999	-1.23409	0.266458	-4.63146	3.63091e-06	0.000782823	117.063	190.03	233.462	163.701	224.782	110.067	91.4587	43.1781	43.75	80.7925	98.7005	HAL
ENSSSCG00000018093	204.495	-1.20805	0.358948	-3.36553	0.000763976	0.0374348	234.963	146.894	586.574	363.393	146.649	79.6421	218.538	166.07	107.386	104.357	94.9759	ND5
ENSSSCG00000033214	460.092	-1.16353	0.292092	-3.98344	6.79244e-05	0.009763	480.796	458.171	1195.04	551.475	609.435	344.519	469.809	290.622	189.583	180.437	291.135	GNMT
ENSSSCG00000016174	360.687	-1.15902	0.308415	-3.75799	0.000171283	0.0184644	292.658	371.899	1053.5	469.044	391.865	330.202	188.694	214.23	298.296	154.179	202.988	FN1
ENSSSCG00000008998	23135.5	-1.01011	0.193909	-5.20919	1.89668e-07	8.17849e-05	25667.8	25162.1	49383.9	31276.2	27982.3	19805.8	13337.6	15610.5	17252.1	15418.6	13594	FGA
ENSSSCG00000012007	73.7816	-0.981175	0.301158	-3.25801	0.00112196	0.0465181	132.951	81.608	116.731	119.583	51.6878	70.6936	36.5835	46.4995	80.8713	46.4557	27.9341	HSPA13
ENSSSCG00000015106	136.412	-0.975503	0.270825	-3.60196	0.000315822	0.0243183	229.946	124.744	172.908	257.742	144.245	111.857	76.0551	81.3741	161.743	82.8123	57.1097	HYOU1
ENSSSCG00000003201	64.1833	-0.971872	0.270523	-3.59256	0.000327444	0.0243438	86.9614	54.794	120.379	55.728	119.002	43.8479	47.1734	36.5353	62.3107	29.6239	49.6606	ATF5
ENSSSCG00000013514	256.075	-0.944493	0.178097	-5.30326	1.1375e-07	6.13111e-05	352.026	249.487	393.238	417.96	323.349	196.868	161.737	129.534	222.727	197.942	171.95	PLIN5
ENSSSCG00000011752	122.265	-0.938431	0.260303	-3.60515	0.000311974	0.0243183	155.527	157.387	168.531	239.166	105.78	109.172	45.248	74.7313	127.273	72.7132	89.3891	FNDC3B
ENSSSCG00000032914	279.756	-0.913997	0.262059	-3.48775	0.000487102	0.0300055	500.028	259.98	309.338	473.688	335.369	269.352	147.297	164.409	311.553	186.496	119.806	MANF
ENSSSCG00000008550	316.544	-0.860564	0.220859	-3.89644	9.76165e-05	0.0123801	321.088	298.452	682.148	459.756	332.965	282.774	223.352	242.462	228.03	191.209	219.748	SLC5A6
ENSSSCG00000003524	505.987	-0.800759	0.228101	-3.51054	0.00044719	0.0292164	614.583	512.965	1087.06	470.205	608.233	442.954	467.883	423.478	314.205	284.12	340.175	C1QA
ENSSSCG00000005643	166.023	-0.791601	0.223039	-3.54915	0.000386475	0.0260387	164.725	185.367	360.408	195.048	170.69	132.439	140.558	116.249	144.508	114.456	101.804
ENSSSCG00000022126	122.316	-0.78804	0.180695	-4.36117	1.29369e-05	0.00253563	165.561	173.709	118.92	157.896	181.508	111.857	96.2723	68.0885	86.1743	78.0994	107.391	EGFR
ENSSSCG00000002487	1830.04	-0.78313	0.18077	-4.33218	1.47639e-05	0.00265258	2449.13	1844.34	2846.78	2981.45	1735.75	1047.88	1242.88	1534.48	1564.4	1543.81	1339.6	SERPINA3-2
ENSSSCG00000005601	1400.94	-0.77895	0.218595	-3.56345	0.000366017	0.0254559	1751.77	1324.38	2004.13	2295.3	1694.88	1510.52	789.433	642.689	1239.58	1104.84	1052.81	HSPA5
ENSSSCG00000029352	126.255	-0.772131	0.221226	-3.49024	0.000482583	0.0300055	163.889	170.211	100.681	192.726	188.72	96.6444	66.4279	106.285	100.758	128.595	73.8702	CCNL1
ENSSSCG00000033074	123.568	-0.729095	0.199101	-3.66193	0.000250323	0.0209832	168.07	103.759	181.663	191.565	144.245	112.752	92.4214	63.1065	112.689	98.9708	90.0099	ZCCHC24
ENSSSCG00000010494	120.672	-0.709657	0.212476	-3.33994	0.00083796	0.0392748	163.889	160.884	159.776	166.023	114.194	116.331	76.0551	68.0885	137.879	68.6736	95.5967	SORBS1
ENSSSCG00000038948	309.526	-0.661171	0.180689	-3.65916	0.000253044	0.0209832	350.354	408.04	337.791	567.729	272.863	246.085	245.494	220.873	273.106	240.358	242.096	ETS2
ENSSSCG00000021867	92.9902	-0.659121	0.184795	-3.56677	0.000361402	0.0254559	101.176	108.422	134.241	141.642	93.7592	74.273	83.7569	89.6776	62.3107	57.9013	75.7324	HPN
ENSSSCG00000007817	109.622	-0.652718	0.178307	-3.66065	0.000251581	0.0209832	163.053	125.91	125.486	109.134	159.871	62.6399	82.7942	92.999	92.8031	94.9312	96.2175	IL4R
ENSSSCG00000034072	739.297	-0.605277	0.175999	-3.43909	0.000583671	0.034669	717.431	712.321	1303.01	919.511	893.116	714.095	586.298	518.137	641.667	581.033	545.646	HSP90B1
ENSSSCG00000016159	376.105	-0.595986	0.177422	-3.35914	0.000781859	0.0374597	371.258	437.186	690.903	385.452	420.714	331.991	339.841	272.354	292.993	299.605	294.86	CPS1
ENSSSCG00000002749	37956.5	-0.589823	0.15455	-3.81638	0.000135423	0.0162206	38923.6	43000.4	63753.5	47320	39306.7	36533.4	29382.3	26820.2	30104	29716.8	32660.5	HP
ENSSSCG00000001499	173.196	-0.538968	0.156955	-3.4339	0.00059497	0.034669	198.172	187.698	210.846	202.014	247.62	118.121	123.229	129.534	148.485	165.625	173.812	DST
ENSSSCG00000015926	409.178	0.438266	0.129514	3.38392	0.000714596	0.0374348	296.839	420.864	309.338	335.529	353.4	459.956	456.331	431.781	535.607	469.27	432.047	ABCB11
ENSSSCG00000011741	340.214	0.448266	0.118931	3.76914	0.000163812	0.0184644	257.539	321.769	246.595	311.148	284.884	401.79	352.357	400.228	380.493	385.784	399.768	GOLIM4
ENSSSCG00000015799	250.865	0.536812	0.159112	3.3738	0.000741392	0.0374348	226.601	232	181.663	196.209	170.69	288.143	328.288	322.175	213.447	334.616	265.684	KLKB1
ENSSSCG00000023686	5185.61	0.538041	0.165475	3.25149	0.00114802	0.0467007	5188.42	4331.05	4035.25	3927.66	3314.03	6263.99	4961.87	8192.21	5143.94	6208.23	5475.08	TTR
ENSSSCG00000027072	172.366	0.561736	0.142746	3.9352	8.31266e-05	0.0112013	132.114	157.387	133.511	146.286	114.194	178.076	214.687	235.819	178.977	210.06	194.918	ATP5IF1
ENSSSCG00000006192	119.15	0.635014	0.188548	3.36791	0.000757407	0.0374348	86.9614	117.749	77.3344	98.6849	76.9306	101.119	171.365	157.766	152.462	122.535	147.74	LACTB2
ENSSSCG00000000385	95.3809	0.639397	0.174445	3.66533	0.000247024	0.0209832	82.7805	75.7789	78.064	76.6259	51.6878	123.49	123.229	107.945	102.083	131.288	96.2175	SLC39A5
ENSSSCG00000013242	69.3263	0.643868	0.188898	3.40854	0.000653114	0.0361055	59.3679	54.794	50.3403	58.05	40.8694	97.5393	84.7196	91.3383	86.1743	76.0796	63.3173	ACP2
ENSSSCG00000036494	475.253	0.647951	0.174808	3.70665	0.000210015	0.0209832	448.186	419.698	310.067	267.03	370.229	577.182	667.167	488.245	591.288	651.053	437.634	ERG28
ENSSSCG00000002529	355.134	0.649041	0.152888	4.2452	2.18397e-05	0.00362202	260.884	331.095	212.305	246.132	308.924	416.108	365.835	430.12	377.841	461.864	495.365	RPS21
ENSSSCG00000010060	376.935	0.686638	0.208469	3.29372	0.000988706	0.042633	371.258	317.105	157.587	232.2	336.571	376.734	430.337	494.887	527.652	485.428	416.528	UPB1
ENSSSCG00000008214	1382.59	0.701416	0.190321	3.68544	0.000228305	0.0209832	1315.29	1183.32	882.78	808.055	964.037	1210.74	2066	1632.46	1431.82	2180.05	1533.89	FABP1
ENSSSCG00000006872	62.1577	0.745942	0.225885	3.30231	0.000958928	0.042633	41.8084	51.2965	50.3403	41.796	42.0714	76.0627	108.788	79.7134	42.4243	77.4261	72.0079	AGL
ENSSSCG00000035811	193.702	0.747294	0.228387	3.27206	0.00106769	0.0451359	168.906	142.231	102.14	118.422	175.498	191.499	206.985	333.8	147.159	298.259	245.82	RPL32
ENSSSCG00000017492	119.072	0.774852	0.229408	3.37761	0.000731179	0.0374348	79.4359	113.085	88.278	56.889	92.5571	91.2753	153.073	147.802	115.341	185.823	186.227	ORMDL3
ENSSSCG00000008829	181.597	0.803133	0.197855	4.0592	4.92418e-05	0.00758324	107.029	130.573	113.083	139.32	157.467	202.237	158.849	269.033	192.235	216.12	311.62	OCIAD2
ENSSSCG00000005488	199.642	0.99187	0.289913	3.42126	0.00062331	0.0353647	192.318	162.05	94.1145	67.338	132.224	204.922	152.11	282.318	311.553	397.23	199.884	ORM1
ENSSSCG00000035297	98.384	1.33136	0.402074	3.31123	0.000928856	0.0426088	42.6445	59.4573	45.2333	67.338	55.2939	290.828	49.0989	71.4099	167.046	181.11	52.7644	ISG12(A)
ENSSSCG00000026044	220.838	1.34389	0.280406	4.79264	1.64605e-06	0.000506983	107.866	165.548	80.9823	112.617	135.831	272.036	234.904	235.819	232.008	603.924	247.682	FDFT1
ENSSSCG00000034570	1247.58	1.57901	0.478662	3.2988	0.000970999	0.042633	438.988	784.603	461.818	589.788	718.82	2183.45	672.943	860.241	1541.86	4434.83	1036.04	IFI6
ENSSSCG00000006238	83.9973	2.11322	0.451323	4.68227	2.83721e-06	0.00067967	36.7914	67.6181	13.1323	17.415	14.4245	205.817	177.141	157.766	127.273	69.3469	37.2455	CYP7A1
